# Supplementary material for: Effect of metabolic syndrome on incidence of oral potentially malignant disorder: a prospective cohort study in Taiwan
Source: PubMed Central journal article supplement — BMJ Open. 2020 Oct 14;10(10):e041971. doi: 10.1136/bmjopen-2020-041971 (PMC7559119; doi:10.1136/bmjopen-2020-041971), 2020-10-14
Supplement: bmjopen-2020-041971.draft_revisions.pdf [file bmjopen-2020-041971.draft_revisions.pdf]

# BMJ Open

BMJ Open is committed to open peer review. As part of this commitment we make the peer review history of every article we publish publicly available.

When an article is published we post the peer reviewers' comments and the authors' responses online. We also post the versions of the paper that were used during peer review. These are the versions that the peer review comments apply to.

The versions of the paper that follow are the versions that were submitted during the peer review process. They are not the versions of record or the final published versions. They should not be cited or distributed as the published version of this manuscript.

BMJ Open is an open access journal and the full, final, typeset and author-corrected version of record of the manuscript is available on our site with no access controls, subscription charges or pay-per-view fees (<http://bmjopen.bmj.com>).

If you have any questions on BMJ Open's open peer review process please email [info.bmjopen@bmj.com](mailto:info.bmjopen@bmj.com)

# BMJ Open

## The Effect of Metabolic Syndrome on Incidence of Oral Potentially Malignant Disorder

|                               |                                                                                                                                                                                                                                                                                                                                                                                                                                                                                                                                                                                                                                                                                                              |
|-------------------------------|--------------------------------------------------------------------------------------------------------------------------------------------------------------------------------------------------------------------------------------------------------------------------------------------------------------------------------------------------------------------------------------------------------------------------------------------------------------------------------------------------------------------------------------------------------------------------------------------------------------------------------------------------------------------------------------------------------------|
| Journal:                      | <i>BMJ Open</i>                                                                                                                                                                                                                                                                                                                                                                                                                                                                                                                                                                                                                                                                                              |
| Manuscript ID                 | bmjopen-2020-041971                                                                                                                                                                                                                                                                                                                                                                                                                                                                                                                                                                                                                                                                                          |
| Article Type:                 | Original research                                                                                                                                                                                                                                                                                                                                                                                                                                                                                                                                                                                                                                                                                            |
| Date Submitted by the Author: | 22-Jun-2020                                                                                                                                                                                                                                                                                                                                                                                                                                                                                                                                                                                                                                                                                                  |
| Complete List of Authors:     | Siewchaisakul, Pallop; Taipei Medical University College of Oral Medicine, School of dentistry<br>Wang, Sen-Te ; Taipei Medical University Hospital<br>Peng, Szu-Min ; National Taiwan University, Institute of Epidemiology and Preventive Medicine, College of Public Health,<br>Sarakarn, Pongdech; Khon Kaen University, Epidemiology and Biostatistics Department, Faculty of Public Health<br>Chen, Li-Sheng; Taipei Medical University College of Oral Medicine, School of Oral Hygiene<br>Chen, Tony Hsiu-Hsi; National Taiwan University, Division of Biostatistics<br>Yeh, Yen-Po; Changhua County Public Health Bureau<br>Yen, Amy Ming-Fang; Taipei Medical University College of Oral Medicine, |
| Keywords:                     | ORAL MEDICINE, ONCOLOGY, Epidemiology < ONCOLOGY                                                                                                                                                                                                                                                                                                                                                                                                                                                                                                                                                                                                                                                             |
|                               |                                                                                                                                                                                                                                                                                                                                                                                                                                                                                                                                                                                                                                                                                                              |

SCHOLARONE™  
Manuscripts

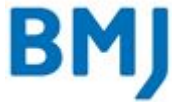

I, the Submitting Author has the right to grant and does grant on behalf of all authors of the Work (as defined in the below author licence), an exclusive licence and/or a non-exclusive licence for contributions from authors who are: i) UK Crown employees; ii) where BMJ has agreed a CC-BY licence shall apply, and/or iii) in accordance with the terms applicable for US Federal Government officers or employees acting as part of their official duties; on a worldwide, perpetual, irrevocable, royalty-free basis to BMJ Publishing Group Ltd ("BMJ") its licensees and where the relevant Journal is co-owned by BMJ to the co-owners of the Journal, to publish the Work in this journal and any other BMJ products and to exploit all rights, as set out in our [licence](#).

The Submitting Author accepts and understands that any supply made under these terms is made by BMJ to the Submitting Author unless you are acting as an employee on behalf of your employer or a postgraduate student of an affiliated institution which is paying any applicable article publishing charge ("APC") for Open Access articles. Where the Submitting Author wishes to make the Work available on an Open Access basis (and intends to pay the relevant APC), the terms of reuse of such Open Access shall be governed by a Creative Commons licence – details of these licences and which [Creative Commons](#) licence will apply to this Work are set out in our licence referred to above.

Other than as permitted in any relevant BMJ Author's Self Archiving Policies, I confirm this Work has not been accepted for publication elsewhere, is not being considered for publication elsewhere and does not duplicate material already published. I confirm all authors consent to publication of this Work and authorise the granting of this licence.

# The Effect of Metabolic Syndrome on Incidence of Oral Potentially Malignant Disorder

Pallop Siewchaisakul<sup>1,2,3\*</sup>, Sen-Te Wang<sup>4,5\*</sup>, Szu-Min Peng<sup>6</sup>, Pongdech Sarakarn<sup>7</sup>, Sam Li-Sheng Chen<sup>2,3</sup>, Hsiu-Hsi Chen<sup>6</sup>, Yen-Po Yeh<sup>6,8</sup>, Amy Ming-Fang Yen<sup>2,3</sup>

\*equally contribution

<sup>1</sup>School of Dentistry, Taipei Medical University, Taipei, Taiwan

<sup>2</sup>Oral Health Care Research Center, College of Oral Medicine, Taipei Medical University, Taipei

<sup>3</sup>School of Oral Hygiene, College of Oral Medicine, Taipei Medical University, Taipei, Taiwan

<sup>4</sup>Department of Family Medicine, School of Medicine, College of Medicine, Taipei Medical University, Taipei, Taiwan

<sup>5</sup>Department of Family Medicine, Taipei Medical University Hospital, Taipei, Taiwan

<sup>6</sup>Institute of Epidemiology and Preventive Medicine, College of Public Health, National Taiwan University

<sup>7</sup>Epidemiology and Biostatistics Department, Faculty of Public Health, Khon Kaen University, Khon Kaen, Thailand

<sup>8</sup>Changhua County Public Health Bureau

Word counts of Abstract: 204, Manuscript: 2,743

Number of references: 46, Tables: 4, Figures: 1

## Running title: Metabolic Syndrome and OPMD

**\*Corresponding author:** Dr. Yen-Po Yeh, Changhua County Public Health Bureau, No.162, Sec. 2, Jhongshan Rd., Changhua City, Changhua County 500, Taiwan, Telephone: +886 -4-711-5141, E-mail: yeh.leego@gmail.com and Professor, Amy Ming-Fang Yen, School of Oral Hygiene, College of Oral Medicine, Taipei Medical University, 250 Wu-Hsing St. Taipei, Taiwan. Telephone: +886-2-27361661 ext 5152, Fax: +886-27362295, E-mail: amyyen@tmu.edu.tw

## Abstract

**Objectives** We aimed to assess the effect of Metabolic Syndrome (MetS) on incident Oral Potentially Malignant Disorder (OPMD).

**Design** We conducted a prospective cohort study by retrieving data from Changhua community-based integrated screening program (CHCIS) and nationwide oral cancer screening program during the period from 2005 to 2014.

**Setting** Changhua community-based integrated screening program (CHCIS), Taiwan.

**Participants** We enrolled 17,638 participants aged over 30 years old.

**Main outcomes and measures** We measured impact of MetS on an interested outcome of incident OPMD.

**Results:** The incidence of OPMD among MetS and MetS-free were 8.15 ‰ and 5.66 ‰, respectively. After adjusted for confounders, subjects with MetS showed statistically the elevated risk of being OPMD as compared with those who were free of MetS by 32% (aRR=1.32, 95%CI: 1.14-1.53). The effect remained in the components of MetS, however only for central obesity (aRR=1.24, 95%CI: 1.06-1.45), hyper-triglyceride (aRR=1.27, 95%CI: 1.08-1.49), and hyperglycemia (aRR=1.23, 95%CI: 1.06-1.44). Individual components included central obesity and hyper-triglyceride were also associated with a sub-type of OPMD, leukoplakia.

**Conclusion:** The temporal influence of MetS on the risk of incident OPMD was noted in our longitudinal cohort study. Therefore, promoting MetS prevention and control program might reduce the occurrence of OPMD and oral cancer.

### Strengths and limitations of this study

- A large population-based prospective cohort study was designed to examine the impact of metabolic syndrome (MetS) on incident oral potentially malignant disorder (OPMD).
- This is the first study to investigate the effect of metabolic syndrome on incidence of OPMD as well as sub-type of OPMD, especially leukoplakia and oral submucous fibrosis.
- Investigating other subtypes of OPMD are limited, due to scanty of other OPMD cases in our population.
- The results of our study were summarized from Taiwanese aged over 30, so that external generalization of our results to other regions would be limited especially on ethnic, genetic and dietary background.

## Introduction

Oral potentially malignant disorders (OPMD) is an disorder that has potential for later progress to oral cancer [1]. Thus, knowledge of the risk factors for an occurrence of OPMD is an important issue for primary prevention of oral cancer [2]. The evidences on tobacco use, betel quid chewing, and alcohol have been well documented as major risk factors for oral potentially malignant disorders (OPMD) [3-7]. Metabolic syndrome (MetS) has been reported to be associated with increased risk of several cancers, including oral cancer [8,9]. In addition to that the presence of MetS has been noted to be associated with OPMD [10,11]. Such association due to the common share of underlying pathways (such as chronic inflammation) could be postulated to be attributed to OPMD. Several studies have proposed the possible biological linkage between OPMD and MetS, which may have pro-inflammatory markers and insulin resistance in common [12-19]. However, the true biological causes accounting for such an association between MetS and OPMD are still elusive. In spite of this, it is still very worthwhile to study how MetS is associated with OPMD by clarification of temporal relationship between MetS and OPMD. A prospective cohort study is therefore required.

In the community-based integrated screening in Changhua, a routine health check-up that embraces biomarker tests for MetS has been conducted annually since 2005 [20] and also the early detection of OPMD and oral cancer has been provided under the instruction of nationwide oral cancer screening program [21]. This screened cohort provides an opportunity to elucidate the effect of MetS on the incidence of OPMD with a normal cohort at baseline following over time until 2014.

Using empirical data from a large population-based integrated screening program in combination with oral cancer screening with oral visual inspection as conducted in Taiwanese

1  
2  
3 nationwide screening programs, the major aim of this study was to assess temporal influence of  
4  
5 MetS on OPMD.  
6  
7  
8  
9  
10  
11  
12  
13  
14  
15  
16  
17  
18  
19  
20  
21  
22  
23  
24  
25  
26  
27  
28  
29  
30  
31  
32  
33  
34  
35  
36  
37  
38  
39  
40  
41  
42  
43  
44  
45  
46  
47  
48  
49  
50  
51  
52  
53  
54  
55  
56  
57  
58  
59  
60

For peer review only



## Materials and methods

### Study design

Our study design consists of two main steps, the first step is for prevalence (cross-sectional design), and the second step is a longitudinal follow-up for incident cases of OPMD (Figure 1). We conducted cross-sectional analysis to determine the prevalence of OPMD among MetS and MetS-free group at baseline (first screening round). This would allow us to create normal cohorts by excluding those who has been diagnosed as OPMD at first screen and also participants who diagnosed as oral cancer. These cohorts retained to undergo repeated screening.

To address our initial hypothesis that whether MetS plays a role as etiology for OPMD, the prospective long-term follow-up study was adopted. We followed up the OPMD-free cohort who attended subsequence screening and linked the CHCIS and nationwide oral cancer registry iteratively to retrieve the status of OPMD in each screening round. Notably, due to the unmatched time of CHCIS and nationwide screening program, we therefore defined the status of being MetS of participants by using the first screening in CHCIS and also the subtype of OPMD at the first diagnosed outcome of the nationwide screening program.

## Study population and data collection

Changhua community-based Integrated Screening is a population based screening program that is identical to the KCIS program which provided multiple cancers screening (liver cancer, breast cancer, colorectal cancer, oral cancer, and cervical cancer), chronic diseases (hyperlipidemia, hypertension, and hyperglycemia) and also MetS and anthropometric measurement [20]. The population in this study consists of dwellers aged 18 years or older that have been invited to participate in oral cancer screening service in Changhua (the CHCIS program) from 2005 to 2014. However, we recruited only participants aged 30 years or older because of sparse numbers of participant lower than 30 years. Therefore, the screening population contained of residents aged over 30 years-old who were free of oral cancer and had been screened at first round and subsequently repeated screening round.

The anthropometric measures for body height, body weight, and circumferences of waist and hip were measured by either public health nurses or well-trained volunteer social workers in the community settings. All participants in the CHCIS program were interviewed to obtain information on education level, oral habits (including betel nut chewing, cigarette smoking, and alcohol drinking), dietary habits, personal disease history, and family disease history, etc. For oral habits, we classified the habit as ex-, ever-, current betel nut chewing, cigarette smoking, or alcohol drinking. In addition to that information which based on questionnaire, the CHCIS program also documented the information of MetS's components, comprised of waist circumference, weight, height, blood pressure and other biochemistry indicator such as fasting glucose, triglyceride and high-density lipoprotein cholesterol levels. Full description of KCIS program [22] and additional information of CHCIS have been described elsewhere [20]. This study was approved by the Institutional Review Board of Taipei Medical University (TMU-JIRB: N201611014)

## **Patient and Public Involvement**

Our study was recruited subjects through the screening programme in Changhua where patient and public involvement was accomplished. In the programme, the Changhua personnel in the local and County Public Health Bureau were responsible. In addition, the staffs also help preparing and advising to facilitate screening service in the community.

The results of our study will be disseminated to the public in community through the personnel of the Changhua County Public Health Bureau.

## **OPMD detection**

Since 2005, the oral visual inspection for all eligible participants has been performed in Changhua County. In each on-site screening center, trained dentists or physicians examined all participants, for those who were clinically diagnosed with oral leukoplakia, erythroleukoplakia, erythroplakia, oral submucous fibrosis (OSF), verrucous hyperplasia and epithelial dysplasia were recorded as positive for OPMD. Instruction on informed consent was first given and approved by those who expressed the willingness of participating in the study.

## **Metabolic syndrome**

Metabolic syndrome (MetS) was defined according to the Epidemiology Task Force Consensus Group criteria (2005) [23] in which participants presented at least three or more of the five components including: (1) central obesity (waist circumference  $\geq 80$  cm for female, and  $\geq 90$  cm for male), (2) hyper-triglyceride ( $\geq 150$  mg/dl), (3) low level of high-density lipoprotein cholesterol (HDL-C) ( $< 50$  mg/dl for female and  $< 40$  mg/dl for male), (4) elevated blood pressure (systolic blood pressure  $\geq 130$  mm Hg or diastolic blood pressure  $\geq 85$  mm Hg), and (5) hyperglycemia (fasting glucose  $\geq 100$  mg/dl).

## Statistical analysis

Prevalence of OPMD is presented as cases per 100 persons. Incidence rate of OPMD is presented as cases per 1,000 persons. The univariate Poisson regression model was first used to estimate the rate ratio (RR) for MetS and factors in association with the risk for developing OPMD. The adjusted incidence rate ratio (aRR) was further estimated using the multi-variable Poisson regression model when significant confounding factors from univariate analysis and other factors reported of having significant association with OPMD in previous studies were retained in the model. In addition to the dichotomous variable for whether having MetS or not, we also examined the effect of each individual component of MetS and also MetS's score in separate models with both univariate and multivariate analyses. The magnitude of the effect between MetS and OSF, leukoplakia, and combined erythroleukoplakia, erythroplakia, verrucous hyperplasia and epithelial dysplasia in each separate multi-variable Poisson regression was quantified. Except for the process of selecting variables to be included in the multivariate analysis, statistical significance was set when  $p < 0.05$ . All analyses were conducted with SAS version 9.4 (SAS Institute Inc., Cary, NC).

## Results

A total of 35,424 subjects aged 30-years or older were included in this study from 2005 to 2014 in Changhua. The prevalence of OPMD was 0.906%. The prevalence of MetS was 31% (Figure 1). Subjects with MetS were statistically significantly 1.46-fold (95% CI: 1.16-1.83) risk for OPMD compared with those without MetS (see Supplementary Table 1).

The incidence of OPMD is shown to vary by demographic and life style factors (Table 1). Most of them were males with median age of 55 years. The incidence of OPMD in subjects with MetS is higher than who are free of MetS, with the corresponding value of 8.15 and 5.66 per thousand person-years respectively.

Table 2 shows the association between MetS and OPMD in the direction that MetS is a cause of OPMD. In univariate analysis, participants with MetS have a 44% increased risk of developing OPMD as compared with those who are MetS-free (RR=1.44, 95%CI: 1.24-1.66). Other factors also showed increased risk of developing OPMD, including male, age less than 70, ever betel nut chewing, cigarette smoking, alcohol drinking, and lower education level. In multivariable analysis, after adjusted for potential confounding factors including age, sex, education level, betel nut chewing, cigarette smoking and alcohol drinking, the MetS remained significant elevated risk of OPMD (aRR=1.32, 95%CI: 1.14-1.53).

1  
2  
3 In addition to focusing just only defining MetS outcome, we also investigated the  
4 individual effect of its components (Table 3). The results showed that central obesity (aRR=1.24,  
5 95%CI: 1.06-1.45), hyper-triglyceride (aRR=1.27, 95%CI: 1.08-1.49) and hyperglycemia  
6 (aRR=1.23, 95%CI: 1.05-1.44) had statistically significant increased risk of OPMD. However, the  
7 effects of MetS's components were shown differently in Table 4, when investigated in different  
8 subtypes of OPMD (leukoplakia and oral submucous fibrosis). For leukoplakia, there were only  
9 central obesity (aRR=1.30, 95%CI: 1.08-1.58) and hyper-triglyceride (aRR=1.29, 95%CI: 1.06-  
10 1.56) that remained effective significantly, while only hyperglycemia (aRR=1.41, 95%CI: 0.98-  
11 1.24) showed a borderline association with increased risk for OSF.  
12  
13  
14  
15  
16  
17  
18  
19  
20  
21  
22  
23  
24  
25  
26  
27  
28  
29  
30  
31  
32  
33  
34  
35  
36  
37  
38  
39  
40  
41  
42  
43  
44  
45  
46  
47  
48  
49  
50  
51  
52  
53  
54  
55  
56  
57  
58  
59  
60

## Discussions

In contrast to previous studies that put emphasis on the association between the MetS and OPMD, the main objective of the present study, in addition to corroborating the association studies, was to investigate a temporal sequence pertaining to the effect of MetS on incident OPMD among non-OPMD subjects based on a longitudinal cohort study. It is very interesting to see the statistically significant impact of MetS on incident OPMD was noted. We use the longitudinal follow-up study design to cope with the limit of cross-sectional study design that cannot elucidate the temporal relationship between MetS and OPMD.

The association between MetS and OPMD has been elucidated in several previous cross-sectional studies, conducted in Keelung community-based integrated screening program (KCIS) and in Yunlin county, that MetS was found to elevate the risk of OPMD by 68% and 39%, respectively [10,11] and also confirmed in our current study. We also found that MetS has a 46% increased risk associated with MetS for the presence of OPM.

Our result further indicated that MetS was associated with the risk of incident OPMD. The impact of MetS on OPMD is favored by an estimation of incidence rate ratio with adjustment for confounding factors (aRR=1.32, 95%CI: 1.14-1.53). Moreover, we found three individual components (central obesity, aRR=1.24, 95%CI: 1.06-1.45; hyper-triglyceride, aRR=1.27, 95%CI: 1.08-1.49 and hyperglycemia, aRR=1.23, 95%CI: 1.05-1.44) were statistically significant increasing the risk of OPMD. Such a causal relationship between MetS and the risk for OPM are independent of two well-established risk factors for oral pre-malignant lesions [3], [4], [5] tobacco use and betel quid chewing. Applying such information to oral cancer screening would add the extra value to identify high-risk category of OPMD.

1  
2  
3 Regarding an independent contributory cause of MetS accounting for OPMD, the link  
4 between MetS and tumor progression in OPM and oral cancer might be attributable to the  
5 common underlying mechanism, an inflammatory process or immune response for both  
6 outcomes. To our knowledge, the exact pathway linking metabolic syndrome and OPMD is still  
7 not clear; however, previous studies proposed common sharable mechanism between MetS and  
8 OPMD, consisted of pro-inflammatory markers (TNF-alpha and C-reactive protein, IL-6), and  
9 insulin resistance [12,19,24]. MetS affects cancer tumor cells through an increasing  
10 proliferation, angiogenesis and damage to the DNA molecule under chronic hyperglycemia,  
11 insulin resistance and hyperinsulinemia [25-29]. In addition, MetS particularly with insulin  
12 resistance can overstimulate insulin growth factor-1 (IGF-1) and insulin receptor. An increasing  
13 and changing of IGF-1 signaling pathway and insulin receptor expression might lead to increase  
14 the risk of cancer [30]. In present study, we found that central obesity, hyperglycemia and  
15 hypertriglyceridemia are significant individual components of MetS for development of OPMD.  
16 Previous study revealed that the central obesity can stimulate insulin resistance, dyslipidemia and  
17 systematic inflammation and in turn, the components considered to play vital role in  
18 pathogenesis of certain type of cancer [31,32]. Moreover, the insulin resistance is also associated  
19 with an increasing of the production of glucose and triglyceride, both were highly associated  
20 with the risk of developing OPMD in our analysis.

21  
22 We also estimated the effect of MetS on subtypes of OPMD (leukoplakia and OSF), and  
23 found that MetS increased risk of two types of OPMD, leukoplakia and OSF; however,  
24 statistically significance was only found in leukoplakia. In addition, among MetS's components,  
25 only central obesity and hyper-triglyceride significantly elevated risk of leukoplakia. These  
26 results were inconsistent with previous study that found only hyper-triglyceride and



1  
2  
3 hyperglycemia significantly increased risk of leukoplakia [11]. Considering of hyper-triglyceride  
4 in leukoplakia, previous study reported significantly higher triglyceride level in leukoplakia than  
5 healthy people [33]. An increasing triglyceride is possibly due to the excessive release of free  
6 fatty acids, which resulted from insulin resistance. Moreover, insulin resistance can be stimulated  
7 by central obesity. In addition, Meisel et al, reported that visceral obesity was more likely to find  
8 in people with leukoplakia than those of non-leukoplakia [34]. The aforementioned studies  
9 support our findings that two of MetS's components, central obesity and hyper-triglyceride,  
10 associated with leukoplakia. However, the mechanism to explain this is still lacking.  
11  
12  
13  
14  
15  
16  
17  
18  
19  
20  
21

22 Even though our study demonstrated that hyperglycemia didn't significantly increase the  
23 risk of OSF, the aRR showed largest increased risk magnitude in OSF. Regarding OSF, it has been  
24 recognized that the development of fibrosis is the pathologically responsible for tissue injury in  
25 which caused by chronic hyperglycemia. The development of fibrosis was driven by accumulation  
26 of extracellular matrix (ECM) [35].  
27  
28  
29  
30  
31  
32  
33

34 One of the unique characteristics of OSF is the symptom of mouth opening restriction [36],  
35 [37,38]. A possible causation for restricted mouth opening might be because of dynamics of ECM  
36 deposited around muscle fibers in different stages of OSF, and these lead to the consequence of  
37 loss of variety of ECM molecules including elastin into the uniform of collagen type I replacing  
38 muscle fibers [39]. Notably, it has been shown that hyperglycemia can alter the collagenolysis [40]  
39 and also ECM's components interaction through advanced glycation end products (AGEs)  
40 modification [41-45]. These reasons mentioned above may support the borderline impact of  
41 hyperglycemia on OSF and its symptom.  
42  
43  
44  
45  
46  
47  
48  
49  
50  
51  
52

53 Another possibility of the discordance between these findings might be due to the  
54 difference of study approaches and community which dietary differs from each other. However,  
55  
56  
57

1  
2  
3 both studies pointed out that the hyper-triglyceride and hyperglycemia were related to OPMD.  
4  
5 Exceptionally to those biological aspects, these results are supported by strong epidemiological  
6  
7 study design in which we followed up the study population from being either MetS or OPMD-free  
8  
9 until occurrence of interested outcomes (OPMD for MetS-free cohort and MetS for OPMD-free  
10  
11 cohort).  
12  
13  
14

15  
16 In the view of oral cancer control, primary prevention is aimed to reduce the exposure to  
17  
18 risk factors. In Taiwan, several cessation campaigns have been launched but most of these efforts  
19  
20 were considered just for conventional risk factors including cigarette smoking and betel nut  
21  
22 chewing. Our study result showed that MetS is one of risk factor for OPMD. In addition, a recent  
23  
24 study also revealed that sweet beverage consumption elevated risk of overall cancer and breast  
25  
26 cancer [46]. Promoting MetS prevention program with controlling of sugar-sweetened beverage  
27  
28 or diet might reduce OPMD and oral cancer incidence in the future. Moreover, in countries like  
29  
30 Taiwan that has nationwide oral cancer screening program, we recommended to consider MetS as  
31  
32 a criterion for screening of oral cancer in addition to age and conventional risk factors.  
33  
34  
35

36  
37 Several limitations existed in our study. First, several confounding factors that may link  
38  
39 MetS and oral cancer, such as family history of oral cancer and history of chronic diseases other  
40  
41 than MetS, were not considered. Second, the results of our study were summarized from Taiwanese  
42  
43 aged over 30, so that external generalization of our results to other regions would be limited  
44  
45 especially on ethnic genetic and dietary background. Third, we analyzed only subtype of OPMD  
46  
47 including only leukoplakia and OSF, due to scanty of other OPMD cases in our population. Lastly,  
48  
49 we did not estimate the effect of OPMD on MetS, for there were not enough incident MetS cases  
50  
51 from people who diagnosed as OPMD at baseline.  
52  
53  
54  
55  
56  
57

1  
2  
3 In conclusion, our prospective cohort study design affirmed the direction that MetS  
4 elevated risk of OPMD. This epidemiological evidence would lead new insight for policy makers  
5  
6 to promote MetS prevention in order to reduce OPMD and oral cancer in the future.  
7  
8  
9

10  
11  
12  
13 **Acknowledgements:** We would like to thank the Taiwan Cancer registry and Changhua Health  
14 bureau for information on screening and cancer registry data.  
15  
16

17  
18 **Contributors:** PS, ST-W, YP-Y, and AMF-Y conceived conceptualization, and methodology.  
19 SM-P and YP-Y contributed to data curation, investigation. PS, SSL-C, and AMF-Y carried out  
20 statistical analysis. PS and ST-W wrote original draft. This study was supervised by YP-Y and  
21 AMF-Y. HH-C and PS\* participated in editing manuscript. All authors have reviewed and  
22 approved the final manuscript  
23  
24  
25  
26  
27  
28  
29

30  
31 **Funding:** This work was supported by Ministry of Science and Technology, Taiwan (MOST 108-  
32 2118-M-038 -001 -MY3 and MOST 108-2118-M-038 -002 -MY3)  
33  
34  
35

36 **Conflicts of interest:** None  
37  
38

39 **Ethics approval:** Institutional Review Board of Taipei Medical University (TMU-JIRB:  
40 N201611014).  
41

42 **Provenance and peer review** Not commissioned; externally peer reviewed.  
43

44 **Data sharing statement:** No additional data are available.  
45

46 **Patient consent for publication:** Not required.  
47  
48  
49  
50  
51  
52  
53  
54  
55  
56  
57  
58  
59  
60

## References

- [1] Warnakulasuriya S. Clinical features and presentation of oral potentially malignant disorders. *Oral Surg Oral Med Oral Pathol Oral Radiol*. 2018;125(6):582-590.
- [2] Sankaranarayanan R, Ramadas K, Amarasinghe H, Subramanian S, Johnson N. Oral Cancer: Prevention, Early Detection, and Treatment. In: Gelband H, Jha P, Sankaranarayanan R, Horton S, eds. *Cancer: Disease Control Priorities, Third Edition (Volume 3)*. The International Bank for Reconstruction and Development / The World Bank; 2015. Accessed October 13, 2019. <http://www.ncbi.nlm.nih.gov/books/NBK343649/>
- [3] Axell T, Holmstrup P, Kramer IRH, Pindborg JJ, Shear M. International seminar on oral leukoplakia and associated lesions related to tobacco habits. *Community Dent Oral Epidemiol*. 1984;12(3):145-154.
- [4] Shiu M-N, Chen T-H. Impact of betel quid, tobacco and alcohol on three-stage disease natural history of oral leukoplakia and cancer: implication for prevention of oral cancer. *Eur J Cancer Prev*. 2004;13(1):39-45.
- [5] Yen AM-F, Chen S-C, Chen TH-H. Dose-response relationships of oral habits associated with the risk of oral pre-malignant lesions among men who chew betel quid. *Oral Oncol*. 2007;43(7):634-638.
- [6] Yen AM-F, Chen S-C, Chang S-H, Chen TH-H. The effect of betel quid and cigarette on multistate progression of oral pre-malignancy. *J Oral Pathol Med*. 2008;37(7):417-422.
- [7] Juntanong N, Siewchaisakul P, Bradshaw P, et al. Prevalence and Factors Associated with Oral Pre-malignant Lesions in Northeast Thailand. *Asian Pac J Cancer Prev*. 2016;17(8):4175-4179.
- [8] Esposito K, Chiodini P, Colao A, Lenzi A, Giugliano D. Metabolic Syndrome and Risk of Cancer. *Diabetes Care*. 2012;35(11):2402-2411.
- [9] Stocks T, Bjørge T, Ulmer H, et al. Metabolic risk score and cancer risk: pooled analysis of seven cohorts. *Int J Epidemiol*. 2015;44(4):1353-1363.
- [10] Chang C-C, Lin M-S, Chen Y-T, Tu L-T, Jane S-W, Chen M-Y. Metabolic syndrome and health-related behaviours associated with pre-oral cancerous lesions among adults aged 20–80 years in Yunlin County, Taiwan: a cross-sectional study. *BMJ Open*. 2015;5(12).
- [11] Yen AM-F, Chen SL-S, Chiu SY-H, Chen H-H. Association between metabolic syndrome and oral pre-malignancy: A community- and population-based study (KCIS No. 28). *Oral Oncol*. 2011;47(7):625-630.
- [12] Chiang CP, Wu HY, Liu BY, Wang JT, Kuo MYP. Quantitative analysis of immunocompetent cells in oral submucous fibrosis in Taiwan. *Oral Oncol*. 2002;38(1):56-63.

- 1  
2  
3 [13] Haque MF, Harris M, Meghji S, Barrett AW. Immunolocalization of cytokines and growth  
4 factors in oral submucous fibrosis. *Cytokine*. 1998;10(9):713-719.  
5  
6 [14] Ma N, Tagawa T, Hiraku Y, Murata M, Ding X, Kawanishi S. 8-Nitroguanine formation in  
7 oral leukoplakia, a premalignant lesion. *Nitric Oxide Biol Chem*. 2006;14(2):137-143.  
8  
9 [15] Rhodus NL, Ho V, Miller CS, Myers S, Ondrey F. NF-kappaB dependent cytokine levels in  
10 saliva of patients with oral preneoplastic lesions and oral squamous cell carcinoma. *Cancer*  
11 *Detect Prev*. 2005;29(1):42-45.  
12  
13 [16] Dietrich T, Reichart PA, Scheifele C. Clinical risk factors of oral leukoplakia in a  
14 representative sample of the US population. *Oral Oncol*. 2004;40(2):158-163.  
15  
16 [17] Dikshit RP, Ramadas K, Hashibe M, Thomas G, Somanathan T, Sankaranarayanan R.  
17 Association between diabetes mellitus and pre-malignant oral diseases: a cross sectional  
18 study in Kerala, India. *Int J Cancer*. 2006;118(2):453-457.  
19  
20 [18] Meisel P, Dau M, Sümnick W, et al. Association Between Glycemia, Serum Lipoproteins,  
21 and the Risk of Oral Leukoplakia. *Diabetes Care*. 2010;33(6):1230-1232.  
22  
23 [19] Ujpál M, Matos O, Bíbok G, Somogyi A, Szabó G, Suba Z. Diabetes and oral tumors in  
24 Hungary: epidemiological correlations. *Diabetes Care*. 2004;27(3):770-774.  
25  
26 [20] Yeh Y-P, Hu T-H, Cho P-Y, et al. Evaluation of Abdominal Ultrasonography Mass  
27 Screening for Hepatocellular Carcinoma in Taiwan. *Hepatol Baltim Md*. 2014;59(5):1840-  
28 1849.  
29  
30 [21] Chuang S-L, Su WW-Y, Chen SL-S, et al. Population-based screening program for  
31 reducing oral cancer mortality in 2,334,299 Taiwanese cigarette smokers and/or betel quid  
32 chewers. *Cancer*. 2017;123(9):1597-1609.  
33  
34 [22] Chen TH-H, Chiu Y-H, Luh D-L, et al. Community-based multiple screening model:  
35 design, implementation, and analysis of 42,387 participants. *Cancer*. 2004;100(8):1734-  
36 1743.  
37  
38 [23] Alberti KGMM, Zimmet P, Shaw J, IDF Epidemiology Task Force Consensus Group. The  
39 metabolic syndrome--a new worldwide definition. *Lancet Lond Engl*.  
40 2005;366(9491):1059-1062.  
41  
42 [24] Hsu H-J, Yang Y-H, Shieh T-Y, et al. Role of cytokine gene (interferon- $\gamma$ , transforming  
43 growth factor- $\beta$ 1, tumor necrosis factor- $\alpha$ , interleukin-6, and interleukin-10)  
44 polymorphisms in the risk of oral precancerous lesions in Taiwanese. *Kaohsiung J Med Sci*.  
45 2014;30(11):551-558.  
46  
47 [25] Bellastella G, Scappaticcio L, Esposito K, Giugliano D, Maiorino MI. Metabolic syndrome  
48 and cancer: "The common soil hypothesis." *Diabetes Res Clin Pract*. 2018;143:389-397.  
49  
50  
51  
52  
53  
54  
55  
56  
57  
58  
59  
60

- 1  
2  
3 [26] Kim S-Y, Han K, Joo Y-H. Metabolic Syndrome and Incidence of Laryngeal Cancer: A  
4 Nationwide Cohort Study. *Sci Rep*. 2019;9(1):1-6.  
5  
6 [27] Berstein LM. Modern approach to metabolic rehabilitation of cancer patients: biguanides  
7 (phenformin and metformin) and beyond. *Future Oncol Lond Engl*. 2010;6(8):1313-1323.  
8  
9 [28] Chia P-P, Fan S-H, Say Y-H. Screening of Peroxisome Proliferator-Activated Receptors  
10 (PPARs)  $\alpha$ ,  $\gamma$  and  $\alpha$  Gene Polymorphisms for Obesity and Metabolic Syndrome Association  
11 in the Multi-Ethnic Malaysian Population. *Ethn Dis*. 2015;25(4):383-390.  
12  
13 [29] Yunusova NV, Spirina LV, Frolova AE, Afanas'ev SG, Kolegova ES, Kondakova IV.  
14 Association of IGFBP-6 Expression with Metabolic Syndrome and Adiponectin and IGF-IR  
15 Receptor Levels in Colorectal Cancer. *Asian Pac J Cancer Prev APJCP*. 2016;17(8):3963-  
16 3969.  
17  
18 [30] Ouchi N, Parker JL, Lugus JJ, Walsh K. Adipokines in inflammation and metabolic disease.  
19 *Nat Rev Immunol*. 2011;11(2):85-97.  
20  
21 [31] Zhang Cuilin, Rexrode Kathryn M., van Dam Rob M., Li Tricia Y., Hu Frank B.  
22 Abdominal Obesity and the Risk of All-Cause, Cardiovascular, and Cancer Mortality.  
23 *Circulation*. 2008;117(13):1658-1667.  
24  
25 [32] Owolabi EO, Ter Goon D, Adeniyi OV. Central obesity and normal-weight central obesity  
26 among adults attending healthcare facilities in Buffalo City Metropolitan Municipality,  
27 South Africa: a cross-sectional study. *J Health Popul Nutr*. 2017;36(1):54.  
28  
29 [33] Granero Fernandez M, Lopez-Jornet P. Association between smoking, glycaemia, blood  
30 lipoproteins and risk of oral leukoplakia. *Aust Dent J*. 2017;62(1):47-51.  
31  
32 [34] Meisel P, Dau M, Sümnnig W, et al. Association between glycemia, serum lipoproteins, and  
33 the risk of oral leukoplakia: the population-based Study of Health in Pomerania (SHIP).  
34 *Diabetes Care*. 2010;33(6):1230-1232.  
35  
36 [35] Ban CR, Twigg SM. Fibrosis in diabetes complications: Pathogenic mechanisms and  
37 circulating and urinary markers. *Vasc Health Risk Manag*. 2008;4(3):575-596.  
38  
39 [36] Angadi PV, Rekha KP. Oral submucous fibrosis: a clinicopathologic review of 205 cases in  
40 Indians. *Oral Maxillofac Surg*. 2011;15(1):15-19.  
41  
42 [37] Shih Y-H, Wang T-H, Shieh T-M, Tseng Y-H. Oral Submucous Fibrosis: A Review on  
43 Etiopathogenesis, Diagnosis, and Therapy. *Int J Mol Sci*. 2019;20(12):2940.  
44  
45 [38] Fang C-Y, Hsia S-M, Hsieh P-L, et al. Slug mediates myofibroblastic differentiation to  
46 promote fibrogenesis in buccal mucosa. *J Cell Physiol*. 2019;234(5):6721-6730.  
47  
48 [39] Utsunomiya H, Tilakaratne WM, Oshiro K, et al. Extracellular matrix remodeling in oral  
49 submucous fibrosis: its stage-specific modes revealed by immunohistochemistry and in situ  
50  
51  
52  
53  
54  
55  
56  
57  
58  
59  
60

- 1  
2  
3 hybridization. *J Oral Pathol Med Off Publ Int Assoc Oral Pathol Am Acad Oral Pathol*.  
4 2005;34(8):498-507.  
5  
6 [40] Stultz CM, Edelman ER. A Structural Model that Explains the Effects of Hyperglycemia on  
7 Collagenolysis. *Biophys J*. 2003;85(4):2198-2204.  
8  
9 [41] Singh VP, Bali A, Singh N, Jaggi AS. Advanced glycation end products and diabetic  
10 complications. *Korean J Physiol Pharmacol Off J Korean Physiol Soc Korean Soc*  
11 *Pharmacol*. 2014;18(1):1-14.  
12  
13 [42] Ashraf JM, Ansari MA, Khan HM, Alzohairy MA, Choi I. Green synthesis of silver  
14 nanoparticles and characterization of their inhibitory effects on AGEs formation using  
15 biophysical techniques. *Sci Rep*. 2016;6:20414.  
16  
17 [43] Bartling B, Desole M, Rohrbach S, Silber R-E, Simm A. Age-associated changes of  
18 extracellular matrix collagen impair lung cancer cell migration. *FASEB J Off Publ Fed Am*  
19 *Soc Exp Biol*. 2009;23(5):1510-1520.  
20  
21 [44] Tarsio JF, Reger LA, Furcht LT. Decreased interaction of fibronectin, type IV collagen, and  
22 heparin due to nonenzymatic glycation. Implications for diabetes mellitus. *Biochemistry*.  
23 1987;26(4):1014-1020.  
24  
25 [45] Pastino AK, Greco TM, Mathias RA, Cristea IM, Schwarzbauer JE. Stimulatory effects of  
26 advanced glycation endproducts (AGEs) on fibronectin matrix assembly. *Matrix Biol J Int*  
27 *Soc Matrix Biol*. 2017;59:39-53.  
28  
29 [46] Chazelas E, Srouf B, Desmetz E, et al. Sugary drink consumption and risk of cancer: results  
30 from NutriNet-Santé prospective cohort. *BMJ*. 2019;366.  
31  
32  
33  
34  
35  
36  
37  
38  
39  
40  
41  
42  
43  
44  
45  
46  
47  
48  
49  
50  
51  
52  
53  
54  
55  
56  
57  
58  
59  
60

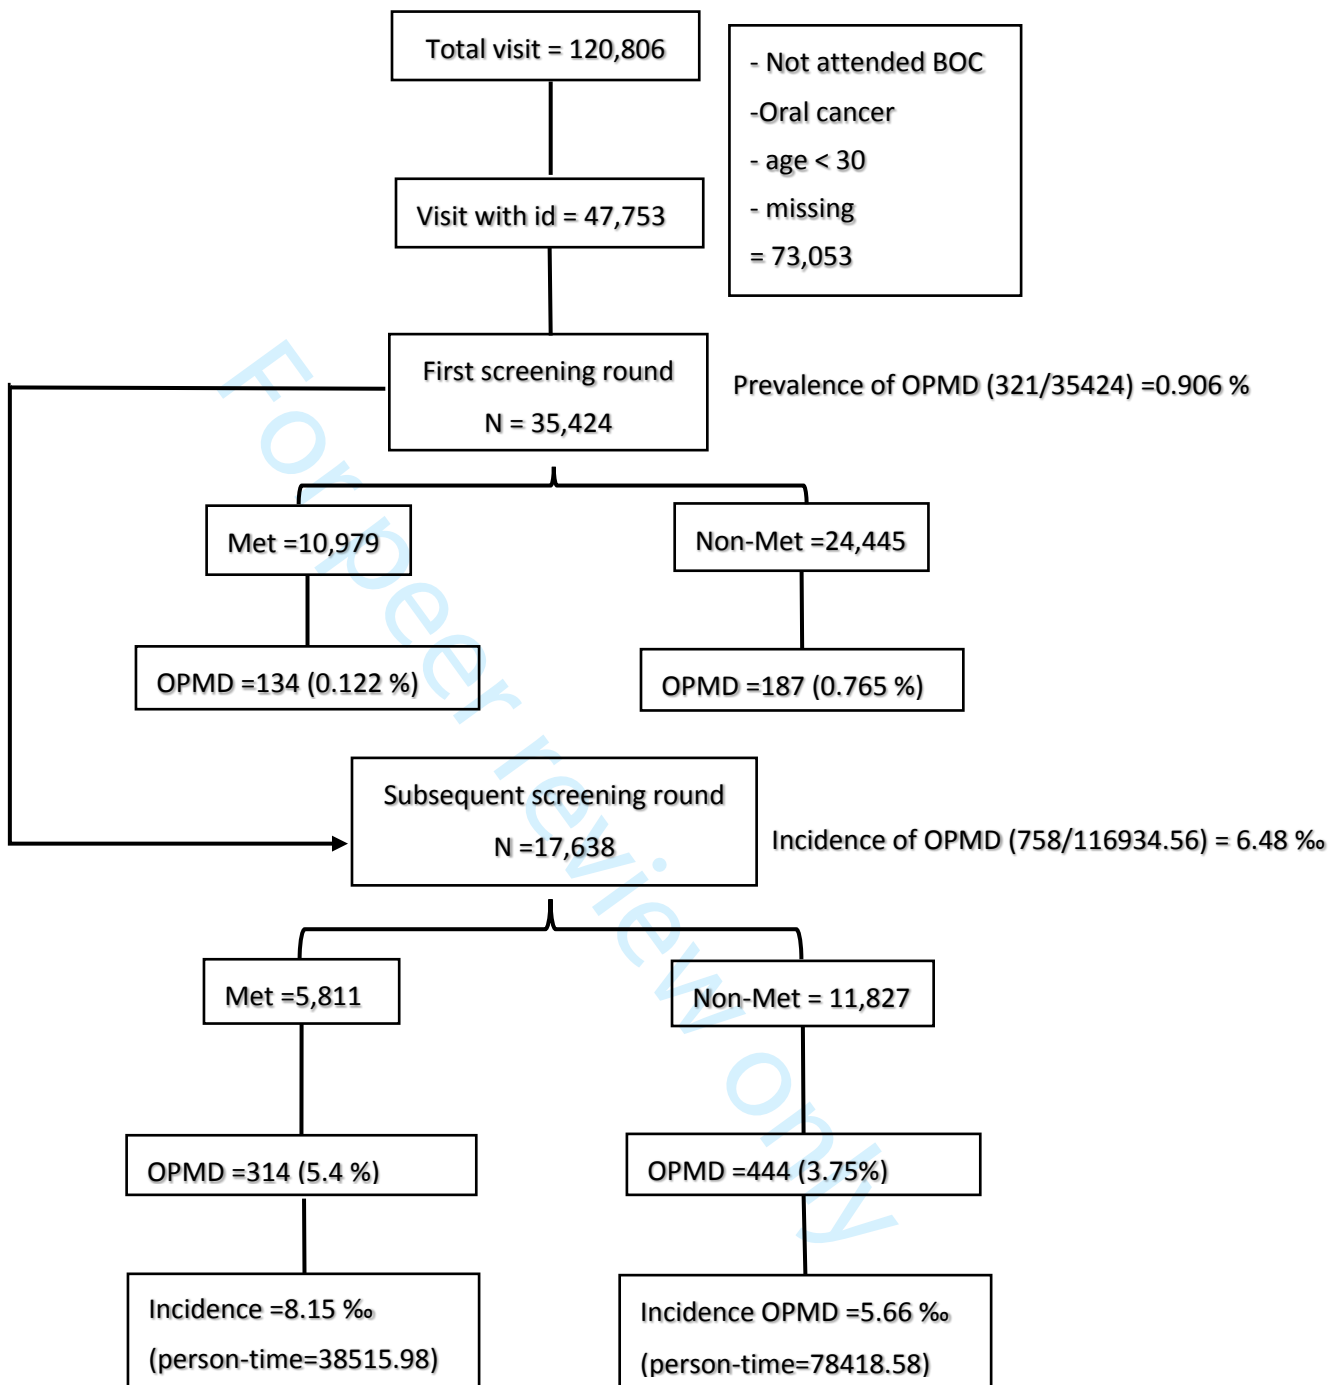

Figure 1 The flow chart for prospective normal cohort study design



**Table 1 The incidence (per 1,000) of oral potentially malignant disorders by demographic features, status of metabolic syndrome and other associated risk factors**

|                           | Person- years | OPMD |              | OSF |              | Leukoplakia |              | Erykoplakia + Erythroleukoplakia + Verrucous hyperplasia + Epithelial Dysplasia |              |
|---------------------------|---------------|------|--------------|-----|--------------|-------------|--------------|---------------------------------------------------------------------------------|--------------|
|                           |               | No.  | Incidence, % | No. | Incidence, % | No.         | Incidence, % | No.                                                                             | Incidence, % |
| <b>Overall</b>            | 116934.6      | 758  | 6.5          | 150 | 1.3          | 521         | 4.5          | 87                                                                              | 0.7          |
| <b>Metabolic syndrome</b> |               |      |              |     |              |             |              |                                                                                 |              |
| Yes                       | 38516.0       | 314  | 8.2          | 58  | 1.5          | 219         | 5.7          | 37                                                                              | 1.0          |
| No                        | 78418.6       | 444  | 5.7          | 92  | 1.2          | 302         | 3.9          | 50                                                                              | 0.6          |
| <b>Age</b>                |               |      |              |     |              |             |              |                                                                                 |              |
| 30-39                     | 8321.2        | 52   | 6.2          | 13  | 1.6          | 28          | 3.4          | 11                                                                              | 1.3          |
| 40-49                     | 29240.6       | 218  | 7.5          | 42  | 1.4          | 154         | 5.3          | 22                                                                              | 0.8          |
| 50-59                     | 35218.4       | 287  | 8.1          | 49  | 1.4          | 205         | 5.8          | 33                                                                              | 0.9          |
| 60-69                     | 27820.5       | 167  | 6.0          | 37  | 1.3          | 115         | 4.1          | 15                                                                              | 0.5          |
| 70+                       | 16333.9       | 34   | 2.1          | 9   | 0.6          | 19          | 1.2          | 6                                                                               | 0.4          |
| <b>Gender</b>             |               |      |              |     |              |             |              |                                                                                 |              |
| Male                      | 104766.8      | 744  | 7.1          | 147 | 1.4          | 511         | 4.9          | 86                                                                              | 0.8          |
| Female                    | 12167.8       | 14   | 1.2          | 3   | 0.2          | 10          | 0.8          | 1                                                                               | 0.1          |
| <b>Betel nut chewing</b>  |               |      |              |     |              |             |              |                                                                                 |              |
| Never                     | 79041.1       | 265  | 3.4          | 39  | 0.5          | 203         | 2.6          | 23                                                                              | 0.3          |
| Quit                      | 23802.4       | 252  | 10.6         | 62  | 2.6          | 162         | 6.8          | 28                                                                              | 1.2          |
| Current                   | 14005.4       | 241  | 17.2         | 49  | 3.5          | 156         | 11.1         | 36                                                                              | 2.6          |
| <b>Cigarette</b>          |               |      |              |     |              |             |              |                                                                                 |              |

**smoking**

|         |         |     |      |    |     |     |     |    |     |
|---------|---------|-----|------|----|-----|-----|-----|----|-----|
| Never   | 46288.0 | 104 | 2.2  | 22 | 0.5 | 75  | 1.6 | 7  | 0.2 |
| Quit    | 24719.2 | 133 | 5.4  | 36 | 1.5 | 82  | 3.3 | 15 | 0.6 |
| Current | 45841.5 | 521 | 11.4 | 92 | 2.0 | 364 | 7.9 | 65 | 1.4 |

**Alcohol drinking**

|         |         |     |     |    |     |     |     |    |     |
|---------|---------|-----|-----|----|-----|-----|-----|----|-----|
| Never   | 53551.6 | 224 | 4.2 | 48 | 0.9 | 155 | 2.9 | 21 | 0.4 |
| Quit    | 6825.2  | 63  | 9.2 | 10 | 1.5 | 44  | 6.4 | 9  | 1.3 |
| Current | 56474.9 | 471 | 8.3 | 92 | 1.6 | 322 | 5.7 | 57 | 1.0 |

**Education level**

|                             |         |     |     |     |     |     |     |    |     |
|-----------------------------|---------|-----|-----|-----|-----|-----|-----|----|-----|
| University                  | 13701.3 | 55  | 4.0 | 4   | 0.3 | 47  | 3.4 | 4  | 0.3 |
| Senior high school          | 26862.0 | 182 | 6.8 | 39  | 1.5 | 126 | 4.7 | 17 | 0.6 |
| Junior high school or lower | 76022.5 | 519 | 6.8 | 107 | 1.4 | 347 | 4.6 | 65 | 0.9 |

---

**OSF:** oral submucous fibrosis

1  
2  
3  
4  
5  
6  
7  
8  
9  
10  
11  
12  
13  
14  
15  
16  
17  
18  
19  
20  
21  
22  
23  
24  
25  
26  
27  
28  
29  
30  
31  
32  
33  
34  
35  
36  
37  
38  
39  
40  
41  
42  
43  
44  
45  
46

**Table 2 The association between MetS, other factors and oral potentially malignant disorders (MetS → OPMD)**

|                                                         | <b>RR</b> | <b>95%CI</b> |       | <b>aRR</b> | <b>95%CI</b> |      |
|---------------------------------------------------------|-----------|--------------|-------|------------|--------------|------|
| <b>Metabolic syndrome</b>                               |           |              |       |            |              |      |
| Yes vs No                                               | 1.44      | 1.24         | 1.66  | 1.32       | 1.14         | 1.53 |
| <b>Gender</b>                                           |           |              |       |            |              |      |
| Male vs Female                                          | 6.90      | 3.90         | 12.20 | 3.34       | 1.86         | 6.00 |
| <b>Age groups (vs 70+)</b>                              |           |              |       |            |              |      |
| 30-39                                                   | 3.00      | 1.95         | 4.62  | 2.53       | 1.62         | 3.95 |
| 40-49                                                   | 3.45      | 2.40         | 4.95  | 2.66       | 1.83         | 3.85 |
| 50-59                                                   | 3.64      | 2.55         | 5.20  | 3.13       | 2.19         | 4.48 |
| 60-69                                                   | 2.80      | 1.93         | 4.04  | 2.53       | 1.75         | 3.66 |
| <b>Betel nut chewing (vs Never)</b>                     |           |              |       |            |              |      |
| Quit                                                    | 3.11      | 2.61         | 3.71  | 2.07       | 1.69         | 2.54 |
| Current                                                 | 5.11      | 4.29         | 6.10  | 2.81       | 2.29         | 3.46 |
| <b>Cigarette smoking (vs Never)</b>                     |           |              |       |            |              |      |
| Quit                                                    | 2.40      | 1.85         | 3.12  | 1.37       | 1.01         | 1.85 |
| Current                                                 | 5.09      | 4.10         | 6.31  | 2.65       | 2.06         | 3.42 |
| <b>Alcohol drinking (vs Never)</b>                      |           |              |       |            |              |      |
| Quit                                                    | 1.94      | 1.65         | 2.28  | 1.21       | 0.90         | 1.64 |
| Current                                                 | 2.20      | 1.65         | 2.91  | 1.01       | 0.85         | 1.21 |
| <b>Education level (vs Junior high school or lower)</b> |           |              |       |            |              |      |
| Senior high school                                      | 0.99      | 0.83         | 1.17  | 0.94       | 0.78         | 1.12 |
| University                                              | 0.59      | 0.45         | 0.78  | 0.78       | 0.58         | 1.05 |

aRR: adjusted rate ratio; CI: confidence interval

**Table 3 The effect of metabolic syndrome components on oral potentially malignant disorders**

|                                        | All OPMD |           |         |
|----------------------------------------|----------|-----------|---------|
|                                        | aRR*     | 95%CI     | p-value |
| <b>Component of metabolic syndrome</b> |          |           |         |
| Central obesity                        | 1.24     | 1.06 1.45 | 0.0066  |
| Hyper-triglyceride                     | 1.27     | 1.08 1.49 | 0.0033  |
| Low HDL-C                              | 1.10     | 0.94 1.29 | 0.2512  |
| Elevated blood pressure                | 0.90     | 0.77 1.05 | 0.1637  |
| Hyperglycemia                          | 1.23     | 1.05 1.44 | 0.0096  |
| <b>Metabolic syndrome score</b>        | 1.14     | 1.08 1.20 | <.0001  |

aRR: adjusted rate ratio; CI: confidence interval.

\* adjusted incidence rate ratio for components of metabolic syndrome and metabolic syndrome score were treated in different models with simultaneously adjusted all other confounders including age, gender, education level, betel nut chewing, cigarette smoking and alcohol drinking.

1  
2  
3  
4  
5  
6  
7  
8  
9  
10  
11  
12  
13  
14  
15  
16  
17  
18  
19  
20  
21  
22  
23  
24  
25  
26  
27  
28  
29  
30  
31  
32  
33  
34  
35  
36  
37  
38  
39  
40  
41  
42  
43  
44  
45  
46

**Table 4 The association between metabolic syndrome and sub-types of oral potentially malignant disorders using multi-variable Poisson regression**

|                                        | Leukoplakia |           |         | OSF  |           |         |
|----------------------------------------|-------------|-----------|---------|------|-----------|---------|
|                                        | aRR*        | 95%CI     | p-value | aRR* | 95%CI     | p-value |
| <b>Metabolic syndrome</b>              |             |           |         |      |           |         |
| Yes vs No                              | 1.36        | 1.14 1.62 | 0.0007  | 1.22 | 0.87 1.71 | 0.2572  |
| <b>Component of metabolic syndrome</b> |             |           |         |      |           |         |
| Central obesity                        | 1.30        | 1.08 1.58 | 0.0059  | 1.06 | 0.74 1.52 | 0.7467  |
| Hyper-triglyceride                     | 1.29        | 1.06 1.56 | 0.0108  | 1.20 | 0.83 1.75 | 0.3390  |
| Low HDL-C                              | 1.17        | 0.97 1.42 | 0.1083  | 0.95 | 0.65 1.38 | 0.7756  |
| Elevated blood pressure                | 0.90        | 0.74 1.08 | 0.2472  | 0.95 | 0.66 1.37 | 0.7949  |
| Hyperglycemia                          | 1.18        | 0.98 1.43 | 0.0848  | 1.41 | 0.98 2.03 | 0.0627  |
| <b>Metabolic syndrome score</b>        | 1.16        | 1.09 1.24 | <.0001  | 1.10 | 0.98 1.24 | 0.0963  |

**aRR**: adjusted rate ratio; **CI**: confidence interval; **OSF**: oral submucous fibrosis

\* adjusted incidence rate ratio for metabolic syndrome, components of metabolic syndrome, and metabolic syndrome score were treated in different models with all other confounders adjusted simultaneously including age, gender, education level, betel nut chewing, cigarette smoking and alcohol drinking

1  
2  
3  
4 “I *Amy Ming-Fang Yen* The Corresponding Author of this article contained within the original  
5 manuscript which includes any diagrams & photographs within and any related or stand alone film  
6 submitted (the Contribution”) has the right to grant on behalf  
7  
8 of all authors and does grant on behalf of all authors, a licence to the BMJ Publishing Group Ltd and  
9  
10 its licencees, to permit this Contribution (if accepted) to be published in the BMJ and any other BMJ  
11 Group products and to exploit all subsidiary rights, as set out in our licence set out at:  
12  
13 [http://www.bmj.com/about-bmj/resources-authors/forms-policies-and-checklists/copyright-open-](http://www.bmj.com/about-bmj/resources-authors/forms-policies-and-checklists/copyright-open-access-and-permission-reuse)  
14 [access-and-permission-reuse.](http://www.bmj.com/about-bmj/resources-authors/forms-policies-and-checklists/copyright-open-access-and-permission-reuse)”  
15  
16  
17  
18  
19

20 IF YOU ARE A NATIONAL INSTITUTE OF HEALTH (“NIH”) EMPLOYEE, CONTRACTOR OR TRAINEE the  
21 following cover sheet will be accepted by the BMJ Group and NIH and incorporated into the above  
22 Licence.  
23  
24  
25  
26  
27

28 Please tick **one or more** boxes as appropriate:

- 29  
30  I am the sole author of the Contribution.  
31  I am one author signing on behalf of all co-owners of the Contribution.  
32  
33  The Contribution has been made in the course of my employment and I am signing as  
34 authorised by my employer.  
35  
36  I am a US Federal Government employee acting in the course of my employment.  
37  I am not a US Federal Government employee, but some or all of my co-authors are.  
38  
39  I am an employee of the UK Crown\* acting in the course of my employment  
40  I am a US Federal Government employee acting in the course of my employment.  
41  I am not a US Federal Government employee, but some or all of my co-authors are.  
42  
43  I am an employee of the UK Crown acting in the course of my employment  
44  I am not an employee of the UK Crown acting in the course of my employment but  
45 some/all of my co-authors are.\*  
46  
47  
48

49 \*Such authors should consult the any guidance issued by their employer and if  
50 necessary return any completed form;  
51 [http://www.nationalarchives.gov.uk/documents/information-management/articles-](http://www.nationalarchives.gov.uk/documents/information-management/articles-ministers-civil-servants-annexa.pdf)  
52 [ministers-civil-servants-annexa.pdf](http://www.nationalarchives.gov.uk/documents/information-management/articles-ministers-civil-servants-annexa.pdf)  
53  
54  
55  
56  
57  
58  
59  
60

**Supplement table 1 The association between MetS, other factors and prevalence of oral potentially malignant disorders**

|                                                         | OR   | 95%CI      | aOR  | 95%CI     |
|---------------------------------------------------------|------|------------|------|-----------|
| <b>Metabolic syndrome</b>                               |      |            |      |           |
| Yes vs No                                               | 1.60 | 1.28 2.00  | 1.46 | 1.16 1.83 |
| <b>gender</b>                                           |      |            |      |           |
| M vs F                                                  | 7.65 | 4.87 12.04 | 2.71 | 1.64 4.48 |
| <b>Age groups (vs 70+)</b>                              |      |            |      |           |
| 30-39                                                   | 0.83 | 0.39 1.77  | 0.86 | 0.39 1.90 |
| 40-49                                                   | 1.78 | 1.09 2.92  | 1.41 | 0.84 2.37 |
| 50-59                                                   | 2.69 | 1.68 4.29  | 2.40 | 1.48 3.88 |
| 60-69                                                   | 1.83 | 1.11 3.01  | 1.76 | 1.07 2.92 |
| <b>Betel nut chewing (vs Never)</b>                     |      |            |      |           |
| Quit                                                    | 3.51 | 2.69 4.57  | 2.48 | 1.62 3.79 |
| Current                                                 | 5.69 | 4.34 7.47  | 4.65 | 3.23 6.68 |
| <b>Cigarette smoking (vs Never)</b>                     |      |            |      |           |
| Quit                                                    | 4.61 | 3.17 6.70  | 2.40 | 1.85 3.12 |
| Current                                                 | 8.96 | 6.58 12.21 | 5.09 | 4.10 6.31 |
| <b>Alcohol drinking (vs Never)</b>                      |      |            |      |           |
| Quit                                                    | 2.83 | 1.78 4.48  | 1.04 | 0.64 1.68 |
| Current                                                 | 2.56 | 2.02 3.25  | 1.04 | 0.80 1.35 |
| <b>Education level (vs Junior high school or lower)</b> |      |            |      |           |
| Senior high school                                      | 1.03 | 0.80 1.33  | 1.10 | 0.84 1.44 |
| University                                              | 0.57 | 0.38 0.85  | 0.87 | 0.57 1.31 |

STROBE Statement—Checklist of items that should be included in reports of *cohort studies*

|                              | Item No | Recommendation                                                                                                                                                                                    | Pages          |
|------------------------------|---------|---------------------------------------------------------------------------------------------------------------------------------------------------------------------------------------------------|----------------|
| <b>Title and abstract</b>    | 1       | (a) Indicate the study's design with a commonly used term in the title or the abstract                                                                                                            | 2              |
|                              |         | (b) Provide in the abstract an informative and balanced summary of what was done and what was found                                                                                               | 2              |
| <b>Introduction</b>          |         |                                                                                                                                                                                                   |                |
| Background/rationale         | 2       | Explain the scientific background and rationale for the investigation being reported                                                                                                              | 4              |
| Objectives                   | 3       | State specific objectives, including any prespecified hypotheses                                                                                                                                  | 4              |
| <b>Methods</b>               |         |                                                                                                                                                                                                   |                |
| Study design                 | 4       | Present key elements of study design early in the paper                                                                                                                                           | 6              |
| Setting                      | 5       | Describe the setting, locations, and relevant dates, including periods of recruitment, exposure, follow-up, and data collection                                                                   | 7              |
| Participants                 | 6       | (a) Give the eligibility criteria, and the sources and methods of selection of participants. Describe methods of follow-up                                                                        | 7              |
|                              |         | (b) For matched studies, give matching criteria and number of exposed and unexposed                                                                                                               | NA             |
| Variables                    | 7       | Clearly define all outcomes, exposures, predictors, potential confounders, and effect modifiers. Give diagnostic criteria, if applicable                                                          | 7              |
| Data sources/<br>measurement | 8*      | For each variable of interest, give sources of data and details of methods of assessment (measurement). Describe comparability of assessment methods if there is more than one group              | 7,8            |
| Bias                         | 9       | Describe any efforts to address potential sources of bias                                                                                                                                         | NA             |
| Study size                   | 10      | Explain how the study size was arrived at                                                                                                                                                         | 7              |
| Quantitative variables       | 11      | Explain how quantitative variables were handled in the analyses. If applicable, describe which groupings were chosen and why                                                                      | 7,9            |
| Statistical methods          | 12      | (a) Describe all statistical methods, including those used to control for confounding                                                                                                             | 9              |
|                              |         | (b) Describe any methods used to examine subgroups and interactions                                                                                                                               | NA             |
|                              |         | (c) Explain how missing data were addressed                                                                                                                                                       | NA             |
|                              |         | (d) If applicable, explain how loss to follow-up was addressed                                                                                                                                    | NA             |
|                              |         | (e) Describe any sensitivity analyses                                                                                                                                                             | NA             |
| <b>Results</b>               |         |                                                                                                                                                                                                   |                |
| Participants                 | 13*     | (a) Report numbers of individuals at each stage of study—eg numbers potentially eligible, examined for eligibility, confirmed eligible, included in the study, completing follow-up, and analysed | 10             |
|                              |         | (b) Give reasons for non-participation at each stage                                                                                                                                              | NA             |
|                              |         | (c) Consider use of a flow diagram                                                                                                                                                                | 10<br>(Figure) |
| Descriptive data             | 14*     | (a) Give characteristics of study participants (eg demographic, clinical, social) and information on exposures and potential confounders                                                          | 10             |
|                              |         | (b) Indicate number of participants with missing data for each variable of interest                                                                                                               | NA             |
|                              |         | (c) Summarise follow-up time (eg, average and total amount)                                                                                                                                       | NA             |
| Outcome data                 | 15*     | Report numbers of outcome events or summary measures over time                                                                                                                                    | 10             |
| Main results                 | 16      | (a) Give unadjusted estimates and, if applicable, confounder-adjusted                                                                                                                             | 10,11          |



|                          |    |                                                                                                                                                                            |       |
|--------------------------|----|----------------------------------------------------------------------------------------------------------------------------------------------------------------------------|-------|
|                          |    | estimates and their precision (eg, 95% confidence interval). Make clear which confounders were adjusted for and why they were included                                     |       |
|                          |    | (b) Report category boundaries when continuous variables were categorized                                                                                                  | NA    |
|                          |    | (c) If relevant, consider translating estimates of relative risk into absolute risk for a meaningful time period                                                           | NA    |
| Other analyses           | 17 | Report other analyses done—eg analyses of subgroups and interactions, and sensitivity analyses                                                                             | NA    |
| <b>Discussion</b>        |    |                                                                                                                                                                            |       |
| Key results              | 18 | Summarise key results with reference to study objectives                                                                                                                   | 12    |
| Limitations              | 19 | Discuss limitations of the study, taking into account sources of potential bias or imprecision. Discuss both direction and magnitude of any potential bias                 | 15    |
| Interpretation           | 20 | Give a cautious overall interpretation of results considering objectives, limitations, multiplicity of analyses, results from similar studies, and other relevant evidence | 12,15 |
| Generalisability         | 21 | Discuss the generalisability (external validity) of the study results                                                                                                      | 15    |
| <b>Other information</b> |    |                                                                                                                                                                            |       |
| Funding                  | 22 | Give the source of funding and the role of the funders for the present study and, if applicable, for the original study on which the present article is based              | 16    |

\*Give information separately for exposed and unexposed groups.

**Note:** An Explanation and Elaboration article discusses each checklist item and gives methodological background and published examples of transparent reporting. The STROBE checklist is best used in conjunction with this article (freely available on the Web sites of PLoS Medicine at <http://www.plosmedicine.org/>, Annals of Internal Medicine at <http://www.annals.org/>, and Epidemiology at <http://www.epidem.com/>). Information on the STROBE Initiative is available at <http://www.strobe-statement.org>.

# BMJ Open

## The Effect of Metabolic Syndrome on Incidence of Oral Potentially Malignant Disorder: A Prospective Cohort Study

|                                 |                                                                                                                                                                                                                                                                                                                                                                                                                                                                                                                                                                                                                                                                                                              |
|---------------------------------|--------------------------------------------------------------------------------------------------------------------------------------------------------------------------------------------------------------------------------------------------------------------------------------------------------------------------------------------------------------------------------------------------------------------------------------------------------------------------------------------------------------------------------------------------------------------------------------------------------------------------------------------------------------------------------------------------------------|
| Journal:                        | <i>BMJ Open</i>                                                                                                                                                                                                                                                                                                                                                                                                                                                                                                                                                                                                                                                                                              |
| Manuscript ID                   | bmjopen-2020-041971.R1                                                                                                                                                                                                                                                                                                                                                                                                                                                                                                                                                                                                                                                                                       |
| Article Type:                   | Original research                                                                                                                                                                                                                                                                                                                                                                                                                                                                                                                                                                                                                                                                                            |
| Date Submitted by the Author:   | 31-Aug-2020                                                                                                                                                                                                                                                                                                                                                                                                                                                                                                                                                                                                                                                                                                  |
| Complete List of Authors:       | Siewchaisakul, Pallop; Taipei Medical University College of Oral Medicine, School of dentistry<br>Wang, Sen-Te ; Taipei Medical University Hospital<br>Peng, Szu-Min ; National Taiwan University, Institute of Epidemiology and Preventive Medicine, College of Public Health,<br>Sarakarn, Pongdech; Khon Kaen University, Epidemiology and Biostatistics Department, Faculty of Public Health<br>Chen, Li-Sheng; Taipei Medical University College of Oral Medicine, School of Oral Hygiene<br>Chen, Tony Hsiu-Hsi; National Taiwan University, Division of Biostatistics<br>Yeh, Yen-Po; Changhua County Public Health Bureau<br>Yen, Amy Ming-Fang; Taipei Medical University College of Oral Medicine, |
| <b>Primary Subject Heading</b>: | Epidemiology                                                                                                                                                                                                                                                                                                                                                                                                                                                                                                                                                                                                                                                                                                 |
| Secondary Subject Heading:      | Nutrition and metabolism, Oncology, Public health                                                                                                                                                                                                                                                                                                                                                                                                                                                                                                                                                                                                                                                            |
| Keywords:                       | ORAL MEDICINE, ONCOLOGY, Epidemiology < ONCOLOGY                                                                                                                                                                                                                                                                                                                                                                                                                                                                                                                                                                                                                                                             |
|                                 |                                                                                                                                                                                                                                                                                                                                                                                                                                                                                                                                                                                                                                                                                                              |

SCHOLARONE™  
Manuscripts

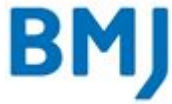

I, the Submitting Author has the right to grant and does grant on behalf of all authors of the Work (as defined in the below author licence), an exclusive licence and/or a non-exclusive licence for contributions from authors who are: i) UK Crown employees; ii) where BMJ has agreed a CC-BY licence shall apply, and/or iii) in accordance with the terms applicable for US Federal Government officers or employees acting as part of their official duties; on a worldwide, perpetual, irrevocable, royalty-free basis to BMJ Publishing Group Ltd ("BMJ") its licensees and where the relevant Journal is co-owned by BMJ to the co-owners of the Journal, to publish the Work in this journal and any other BMJ products and to exploit all rights, as set out in our [licence](#).

The Submitting Author accepts and understands that any supply made under these terms is made by BMJ to the Submitting Author unless you are acting as an employee on behalf of your employer or a postgraduate student of an affiliated institution which is paying any applicable article publishing charge ("APC") for Open Access articles. Where the Submitting Author wishes to make the Work available on an Open Access basis (and intends to pay the relevant APC), the terms of reuse of such Open Access shall be governed by a Creative Commons licence – details of these licences and which [Creative Commons](#) licence will apply to this Work are set out in our licence referred to above.

Other than as permitted in any relevant BMJ Author's Self Archiving Policies, I confirm this Work has not been accepted for publication elsewhere, is not being considered for publication elsewhere and does not duplicate material already published. I confirm all authors consent to publication of this Work and authorise the granting of this licence.

1  
2  
3 **1 The Effect of Metabolic Syndrome on Incidence of Oral Potentially Malignant**  
4  
5  
6 **2 Disorder: A Prospective Cohort Study**  
7

8  
9 3 Pallop Siewchaisakul<sup>1,2,3#</sup>, Sen-Te Wang<sup>4,5#</sup>, Szu-Min Peng<sup>6</sup>, Pongdech Sarakarn<sup>7</sup>, Chen, Li-Sheng  
10  
11 4 <sup>2,3</sup>, Chen, Tony Hsiu-Hsi <sup>6</sup>, Yen-Po Yeh<sup>6,8,\*</sup>, Amy Ming-Fang Yen<sup>2,3,\*</sup>  
12  
13  
14  
15

16 6 # These authors contribute equally.  
17  
18  
19

20 8 <sup>1</sup>School of Dentistry, Taipei Medical University, Taipei, Taiwan  
21

22 9 <sup>2</sup>Oral Health Care Research Center, College of Oral Medicine, Taipei Medical University,  
23  
24 Taipei  
25

26  
27 11 <sup>3</sup> School of Oral Hygiene, College of Oral Medicine, Taipei Medical University, Taipei, Taiwan  
28

29 12 <sup>4</sup>Department of Family Medicine, School of Medicine, College of Medicine, Taipei Medical  
30  
31 University, Taipei, Taiwan  
32

33  
34 14 <sup>5</sup>Department of Family Medicine, Taipei Medical University Hospital, Taipei, Taiwan  
35

36 15 <sup>6</sup> Institute of Epidemiology and Preventive Medicine, College of Public Health, National Taiwan  
37  
38 University  
39

40  
41 17 <sup>7</sup>Epidemiology and Biostatistics Department, Faculty of Public Health, Khon Kaen University,  
42  
43 Khon Kaen, Thailand  
44

45 19 <sup>8</sup>Changhua County Public Health Bureau  
46  
47  
48  
49

50 21 Word counts of Abstract: 199, Manuscript: 3184  
51

52 22 Number of references: 45, Tables: 4, Figures: 1  
53  
54  
55  
56  
57  
58  
59  
60

1  
2  
3 24 **Running title: Metabolic Syndrome and OPMD**  
4

5 25  
6

7  
8 26 **\* Corresponding author:**  
9

10 27 Dr. Yen-Po Yeh, Changhua County Public Health Bureau, No.162, Sec. 2, Jhongshan Rd.,  
11

12 28 Changhua City, Changhua County 500, Taiwan, Telephone: +886 -4-711-5141, E-mail:  
13

14 29 yeh.leego@gmail.com, and  
15

16  
17 30 Professor Amy Ming-Fang Yen, School of Oral Hygiene, College of Oral Medicine, Taipei  
18

19 31 Medical University, 250 Wu-Hsing St. Taipei, Taiwan. Telephone: +886-2-27361661 ext 5152,  
20

21 32 Fax: +886-27362295, E-mail: amyyen@tmu.edu.tw  
22  
23  
24 33  
25  
26  
27  
28  
29  
30  
31  
32  
33  
34  
35  
36  
37  
38  
39  
40  
41  
42  
43  
44  
45  
46  
47  
48  
49  
50  
51  
52  
53  
54  
55  
56  
57  
58  
59  
60

34

**Abstract**

**Objectives** We aimed to assess the effect of metabolic syndrome (MetS) on incident oral potentially malignant disorder (OPMD).

**Design** We conducted a prospective cohort study from Changhua community-based integrated screening (CHCIS) program and nationwide oral cancer screening program during the period between 2005 and 2014.

**Setting** Changhua community-based integrated screening CHCIS, Taiwan.

**Participants** We enrolled 17,590 participants aged over 30 years old.

**Main outcomes and measures** We assessed the impact of MetS on the outcome measured by incident OPMD.

**Results:** The incidence of OPMD among subjects with and without MetS were 7.68 ‰ and 5.38 ‰, respectively. After adjusting for confounders, subjects with MetS showed a statistically greater risk of developing OPMD than those who were free of MetS by 33% (aRR=1.33, 95% CI: 1.14-1.55). Individual components of MetS still remained significant, including central obesity (aRR=1.22, 95% CI: 1.04-1.44), hyper-triglyceride (aRR=1.26, 95% CI: 1.07-1.49), and hyperglycemia (aRR=1.20, 95% CI: 1.02-1.41). Central obesity and hyper-triglyceride were also statistically associated with a sub-type of OPMD, leukoplakia.

**Conclusion:** The temporal influence of MetS on the risk of incident OPMD was noted in our prospective cohort study. Therefore, promoting MetS prevention and control program might reduce the occurrence of OPMD and oral cancer.

1  
2  
3 55 **Strengths and limitations of this study**  
4

- 5 56 • A large population-based prospective cohort study was conducted to examine the impact of  
6  
7 metabolic syndrome (MetS) on incident oral potentially malignant disorder (OPMD).  
8 57  
9  
10 58 • This is the first study to investigate the effect of metabolic syndrome on incidence of  
11  
12 59 OPMD as well as sub-types of OPMD, especially leukoplakia and oral submucous fibrosis.  
13  
14 60 • Investigating other subtypes of OPMD are limited, due to sparse other OPMD cases in our  
15  
16 61 population.  
17  
18  
19 62 • The results of our study are summarized from Taiwanese aged over 30 so that external  
20  
21 63 generalization of our results to other regions would be limited especially on ethnic, genetic  
22  
23 64 and dietary background.  
24  
25  
26  
27  
28  
29  
30  
31  
32  
33  
34  
35  
36  
37  
38  
39  
40  
41  
42  
43  
44  
45  
46  
47  
48  
49  
50  
51  
52  
53  
54  
55  
56  
57  
58  
59  
60

## 65 Introduction

66 Oral potentially malignant disorder (OPMD) is an disorder that has potential for  
67 subsequent progression to oral cancer [1]. Thus, to have a better understanding of risk factors  
68 accounting for the occurrence of OPMD is an important issue for primary prevention of oral  
69 cancer [2]. Evidence on tobacco use, betel quid chewing, and alcohol drinking has been well  
70 documented as major risk factors for OPMD [3-4]. Metabolic syndrome (MetS) has been  
71 reported to be associated with the increased risk of several cancers, including oral cancer [5,6].  
72 MetS has also been noted to be associated with OPMD [7,8]. Such an association due to the  
73 common shared underlying pathway (such as chronic inflammation) could be attributed to  
74 OPMD. Several studies have proposed the possible biological linkage between OPMD and MetS,  
75 which may have pro-inflammatory markers and insulin resistance in common [9-10]. However,  
76 the true biological causes accounting for such an association between MetS and OPMD are still  
77 elusive. In spite of this, it is still very worthwhile to study how MetS is associated with OPMD  
78 by the clarification of temporal relationship between MetS and OPMD. A prospective cohort  
79 study is therefore required.

80 In the Changhua community-based integrated screening (CHCIS), a routine health check-  
81 up that embraces biomarker tests for MetS has been conducted annually since 2005 [11]. The  
82 early detection of OPMD and oral cancer has been provided under the instruction of nationwide  
83 oral cancer screening program [12]. This screened cohort provides an opportunity to elucidate  
84 the effect of MetS on the incidence of OPMD with a normal cohort at baseline following over  
85 time until 2014.



1  
2  
3  
4  
5  
6  
7  
8  
9  
10  
11  
12  
13  
14  
15  
16  
17  
18  
19  
20  
21  
22  
23  
24  
25  
26  
27  
28  
29  
30  
31  
32  
33  
34  
35  
36  
37  
38  
39  
40  
41  
42  
43  
44  
45  
46  
47  
48  
49  
50  
51  
52  
53  
54  
55  
56  
57  
58  
59  
60

86           Using empirical data from a large population-based integrated screening program in  
87 combination with nationwide oral cancer screening program with oral visual inspection, the  
88 major aim of this study was to assess the temporal influence of MetS on OPMD.

For peer review only

## 89 **Materials and methods**

### 90 **Study design**

91 Our study design consists of two main steps, the first step is tailored for prevalence (cross-  
92 sectional design), and the second step is a longitudinal follow-up for incident cases of OPMD  
93 (Figure 1). We conducted cross-sectional analysis to determine the prevalence of OPMD among  
94 MetS and MetS-free group at baseline (identified at the first screening round). This would allow  
95 us to create a normal cohort by excluding those who has been diagnosed as OPMD or oral cancer  
96 before or at first screen. Subjects in this normal cohort have underwent repeated screening  
97 continuously.

98 To address our initial hypothesis that whether MetS plays a role as etiology for OPMD, a  
99 prospective follow-up study was adopted. We followed the OPMD-free cohort who attended  
100 subsequence screening in the nationwide oral cancer screening program to identify those with  
101 OPMD diagnosis in subsequent screening rounds. It should be noted that subjects may attend the  
102 CHCIS and nationwide oral cancer screening program at different times. We defined the status of  
103 MetS of participants by using the first screen in CHCIS, and the first diagnosis of OPMD in the  
104 nationwide oral cancer screening program.

### 106 **Study population and data collection**

107 CHCIS program is a population-based screening program, which followed the service  
108 model of the Keelung community-based integrated screening (KCIS) program [13]. These  
109 programs provided screening services of multiple cancers (liver cancer, breast cancer, colorectal  
110 cancer, oral cancer, and cervical cancer), chronic diseases (hyperlipidemia, hypertension, and  
111 hyperglycemia, and MetS), and anthropometric measurements [11]. The population in this study

1  
2  
3 112 consists of dwellers aged 30 years or older that have been participated in both CHCIS and the  
4  
5 113 nationwide oral cancer screening program between 2005 and 2014. Subjects who had a diagnosis  
6  
7  
8 114 of oral cancer before the first attendance to the CHCIS program were excluded.  
9

10 115 All participants were instructed to follow an 8-hour fasting before blood drawing.  
11  
12 116 Biochemical examination on fasting glucose and lipid profiles was performed. The anthropometric  
13  
14  
15 117 measures for body height, body weight, and circumferences of waist and hip were measured by  
16  
17 118 either public health nurses or well-trained volunteer social workers in the community settings. All  
18  
19 119 participants in the CHCIS program were interviewed to obtain information on education level, oral  
20  
21 120 habits (including betel nut chewing, cigarette smoking, and alcohol drinking), dietary habits,  
22  
23  
24 121 personal disease history, and family disease history. For oral habits, we classified the habit as  
25  
26 122 never-, quit-, and current use. Quitting in our study refers to that participants who had ever habitual  
27  
28 123 use of chewing betel quid, smoking cigarette, or drinking alcohol; however, at the time of  
29  
30  
31 124 interview, they had no regular consumption of betel quid, cigarette, or alcohol. Dietary factors,  
32  
33 125 including meat, vegetable and fruit consumption were classified as seldom (including never),  
34  
35 126 infrequent, and frequent consumption. Infrequent meat consumption was defined as having 1-2  
36  
37  
38 127 units per day, and frequent meat consumption as 3-4 units per day. Infrequent vegetable  
39  
40 128 consumption was defined as having a half or 1 bowl per day, and frequent vegetable consumption  
41  
42 129 was defined as 3-4 bowls per day. Infrequent fruit consumption was defined as having 1-4 times  
43  
44  
45 130 per week, and frequent-fruit consumption as more than 5 times per week.  
46

47 131 Instruction on informed consent was first given and approved by those who expressed the  
48  
49 132 willingness of participating in the study. This study was approved by the Institutional Review  
50  
51 133 Board of Taipei Medical University (TMU-JIRB: N201611014)  
52  
53

54 134  
55  
56  
57  
58  
59  
60

### 135 **OPMD detection**

136 Since 2005, the oral visual inspection for all eligible participants has been performed in  
137 Changhua County. In each on-site screening center, trained dentists or physicians examined all  
138 participants. For those who were clinically diagnosed with oral leukoplakia, erythroleukoplakia,  
139 erythroplakia, oral submucous fibrosis (OSF), and verrucous hyperplasia were recorded as positive  
140 for OPMD.

### 142 **Metabolic syndrome**

143 Metabolic syndrome (MetS) was defined according to the Epidemiology Task Force  
144 Consensus Group criteria (2005) [14] in which participants presented at least three or more of the  
145 five components including: (1) central obesity (waist circumference  $\geq 80$  cm for female, and  $\geq 90$   
146 cm for male), (2) hyper-triglyceride ( $\geq 150$  mg/dl), (3) low level of high-density lipoprotein  
147 cholesterol (HDL-C) ( $< 50$  mg/dl for female and  $< 40$  mg/dl for male), (4) elevated blood pressure  
148 (systolic blood pressure  $\geq 130$  mm Hg or diastolic blood pressure  $\geq 85$  mm Hg), and (5)  
149 hyperglycemia (fasting glucose  $\geq 100$  mg/dl).

### 151 **Patient and Public Involvement**

152 Participants in our study were recruited through the CHCIS programme. Participants did  
153 not involve in designing or conducting the study. Staff in the Changhua County Public Health  
154 Bureau and local health centers were responsible for preparation and implementation of the  
155 screening service in the community.

156 The results of our study will be disseminated to the public in community through the  
157 Changhua County Public Health Bureau.

158

159

**160 Statistical analysis**

161 Prevalence of OPMD was presented as cases per 100 persons. Incidence rate of OPMD  
162 was presented as cases per 1,000 person-years. The univariate Poisson regression model was first  
163 used to estimate the rate ratio (RR) for MetS and factors in association with the risk for developing  
164 OPMD. The adjusted rate ratio (aRR) was further estimated using the multi-variable Poisson  
165 regression model when significant confounding factors from the univariate analyses and other  
166 factors reported of having significant association with OPMD in previous studies were retained in  
167 the model. In addition to the dichotomous variable for whether to have MetS or not, we also  
168 examined the effect of each individual component of MetS and also MetS's score in separate  
169 models with both univariate and multivariate analyses. The magnitude of the effect between MetS  
170 and sub-types of OPMD was estimated in separate multi-variable Poisson regression models.  
171 Statistical significance was set when  $p < 0.05$ . All analyses were conducted with SAS version 9.4  
172 (SAS Institute Inc., Cary, NC).

## 173 Results

174 A total of 35,411 subjects aged 30-years or older were included in this study from 2005 to  
175 2014 in Changhua. The prevalence of OPMD was 0.87% (=306/35,411). The prevalence of MetS  
176 was 31% (=10,974/35,411) (Figure 1). Subjects with MetS had a statistically significantly 1.44  
177 times (95% CI: 1.14-1.82) likely to develop the risk for OPMD compared with those without MetS  
178 (see Supplementary Table 1).

179 The incidence of OPMD is shown to vary by demographic and life style factors (Table 1).  
180 The incidence of OPMD in subjects with MetS (7.68 per 1000 person-years) was higher than those  
181 who were free of MetS (5.38 per 1000 person-years). Male, subjects aged between 40-59 years,  
182 higher body mass index (BMI), higher blood pressure, and elevated lip profiles tended to show a  
183 higher risk of OPMD compared with their complementary groups. Ever having habit of betel quid  
184 chewing, smoking, and alcohol drinking were associated with higher incidence of OPMD. High  
185 consumption of meat and lower consumption of vegetables and fruit were also related to higher  
186 risk of OPMD.

187 Table 2 shows the effect of MetS on the risk of OPMD. In the univariate analysis,  
188 participants with MetS had a 42% greater risk of developing OPMD than those who were MetS-  
189 free (RR=1.42, 95% CI: 1.22-1.66). Other factors also showed increased risks of developing  
190 OPMD, including male, age less than 70, betel nut chewing, cigarette smoking, alcohol drinking,  
191 meat consumption, and lower education level. In multivariable analysis, after adjusting for  
192 potential confounding factors including age, sex, education level, betel nut chewing, cigarette  
193 smoking, meat consumption, vegetable consumption, the intake of fruit, and alcohol drinking,  
194 MetS leading to the elevated risk of OPMD still remained significant (aRR=1.33, 95% CI: 1.14-  
195 1.55).

1  
2  
3 196 In addition to focusing only on MetS outcome, we also investigated the effects of individual  
4  
5 197 components of MetS (Table 3). The results showed that central obesity (aRR=1.22, 95% CI: 1.04-  
6  
7 1.44), hyper-triglyceride (aRR=1.26, 95% CI: 1.07-1.49) and hyperglycemia (aRR=1.20, 95% CI:  
8  
9 1.02-1.41) led to a statistically significant increased risk of OPMD. However, the effects of MetS's  
10  
11 199 components were different with respect to the subtypes of OPMD (Table 4). For leukoplakia, only  
12  
13 200 central obesity (aRR=1.30, 95% CI: 1.07-1.57) and hyper-triglyceride (aRR=1.29, 95% CI: 1.06-  
14  
15 201 1.57) remained significant. Only hyperglycemia (aRR=1.43, 95% CI: 0.99-2.05) showed a  
16  
17 202 borderline association with an increased risk for OSF. MetS led to an elevated risk of verrucous  
18  
19 203 hyperplasia by 33%, but it was not statistically significant due to the small number (aRR=1.33,  
20  
21 204 95% CI: 0.51-3.46). Same phenomenon was noted for erythroplakia and erythroleukoplakia  
22  
23 205 (aRR=1.59, 95% CI: 0.67-3.75). We also provide the detailed results on the effects of dichotomous  
24  
25 206 MetS, individual components of MetS and MetS score for all OPMD (Supplementary Tables 2-3),  
26  
27 207 leukoplakia (Supplementary Tables 4-6), OSF (Supplementary Tables 7-9), verrucous hyperplasia  
28  
29 208 (Supplementary Tables 10-12), and erythroplakia and erythroleukoplakia (Supplementary Tables  
30  
31 209 13-15).  
32  
33  
34  
35  
36  
37  
38  
39  
40  
41  
42  
43  
44  
45  
46  
47  
48  
49  
50  
51  
52  
53  
54  
55  
56  
57  
58  
59  
60

## 211 Discussion

212 In contrast to previous studies that put emphasis on the association between MetS and  
213 OPMD, the main objective of the present study, in addition to corroborating the association  
214 studies, was to investigate a temporal sequence pertaining to the effect of MetS on incident  
215 OPMD based on a longitudinal cohort study. The statistically significant impact of MetS on  
216 incident OPMD was observed. We used the longitudinal follow-up study design to cope with the  
217 limitation of the cross-sectional study design that cannot elucidate the temporal relationship  
218 between MetS and OPMD.

219 The association between MetS and OPMD has been elucidated in several previous cross-  
220 sectional studies, conducted in Keelung community-based integrated screening program (KCIS)  
221 and in Yunlin county, in that MetS was found to elevate the risk of OPMD by 68% and 39%,  
222 respectively [7,8], which has been also confirmed in our current study. We also found that MetS  
223 led to a 44% increased risk associated with MetS for the presence of OPMD.

224 Furthermore, given a prospective cohort study design, our study further demonstrated the  
225 temporal effect of MetS and individual components on incident OPMD. Such a causal  
226 relationship between MetS and the risk for OPMD is independent of two well-established risk  
227 factors for oral pre-malignant lesions, smoking and betel quid chewing [3], [15], [16]. Applying  
228 such information to oral cancer screening would provide additional value for identifying high-  
229 risk category of OPMD.

230 Regarding an independent contributory cause of MetS accounting for OPMD, the link  
231 between MetS and tumor progression in OPMD and oral cancer might be attributable to the  
232 common underlying mechanism, an inflammatory process or immune response for both  
233 outcomes. To our knowledge, the exact pathway linking MetS and OPMD is still unclear.



1  
2  
3 234 However, cytokine is often secreted by immune cells in response to inflammation. This would  
4  
5 235 lead to the greater amount of C-Reactive Protein (CRP) [17]. CRP is known as a biomarker for  
6  
7 236 cardiovascular disease. Recently, it was found to increase oxygen radical as well [18]. These  
8  
9  
10 237 inflammatory factors can activate oncogenes and inactivate tumor suppressor genes, and can  
11  
12 238 potentially induce cell proliferation and prolong cell survival, which may result in genetic  
13  
14 239 instability with an increased risk of cancer [19]. Previous studies proposed common shared  
15  
16 240 mechanisms between MetS and OPMD, including pro-inflammatory markers (TNF-alpha and  
17  
18 241 CRP, IL-6), and insulin resistance [9,10,20]. Therefore, MetS may affect cancer tumor cells  
19  
20 242 through an increasing proliferation, angiogenesis and damage to the DNA molecule under  
21  
22 243 chronic hyperglycemia, insulin resistance and hyperinsulinemia [21-22]. In addition, MetS  
23  
24 244 particularly with insulin resistance can overstimulate insulin growth factor-1 (IGF-1) and insulin  
25  
26 245 receptor. An increasing and changing of IGF-1 signaling pathway and insulin receptor  
27  
28 246 expression might lead to an increased risk of cancer as well [17]. In present study, we found that  
29  
30 247 central obesity, hyperglycemia, and hypertriglyceridemia were significant individual components  
31  
32 248 of MetS responsible for the development of OPMD. Previous studies revealed that the central  
33  
34 249 obesity can stimulate insulin resistance, dyslipidemia and systematic inflammation. In turn, the  
35  
36 250 individual components were considered to play a vital role in the pathogenesis of certain type of  
37  
38 251 cancers [23,24]. Moreover, the insulin resistance was also associated with an increase in the  
39  
40 252 production of glucose and triglyceride. Both were highly associated with the risk of developing  
41  
42 253 OPMD in our analysis.

43  
44 254 Betel quid's substances (nitrosated and arecal alkaloid derivatives) have been confirmed  
45  
46 255 to increase the risk of oral cancer and OPMD. This effect was not restricted to their direct contact  
47  
48 256 tissue. Lee et al, found that betel quid chewing and components of MetS have a positive

1  
2  
3 257 correlation explained by oxidative stress and inflammation [25]. An increase in the risk of oral  
4  
5 258 cancer or OPMD by consuming betel quid and also cigarette smoking or alcohol drinking were  
6  
7  
8 259 noted in our study even those patients who had quitted these habits because they have had  
9  
10 260 exposed to those carcinogenesis components for a sufficient period. Our results were consistent  
11  
12 261 with previous studies, demonstrated that former or ex- consuming of these oral habits still had  
13  
14 262 higher risk of oral cancer, leukoplakia and OSF compared with non-users[26, 27].

15  
16  
17 263 Aside from betel quid, foods were also of concern. Numbers of studies unveiled that  
18  
19 264 potential diet such as red meat was associated with increased IL-6 [28], and vegetable and fruit  
20  
21 265 could lowered CRP [29]. In our study, we found that only fruit with high consumption was  
22  
23 266 shown to be a protective factor of OPMD. Our findings were consistent with Fann et al, and  
24  
25 267 Maserejian et al., who found that fruit decreased the risk of periodontal disease and OPMD,  
26  
27 268 respectively [30,31]. Interestingly, fruit could reduce the risk of MetS as well [32]. Therefore,  
28  
29 269 these findings support our hypothesis that inflammatory is one of the potential mechanisms  
30  
31 270 underlying between MetS and OPMD.  
32  
33

34  
35 271 We examined the effect of MetS on subtypes of OPMD, and found that MetS was  
36  
37 272 associated with an increased risk of leukoplakia, but not in other sub-types, including OSF,  
38  
39 273 verrucous hyperplasia, and erythleukoplakia due to small number of cases. For leukoplakia,  
40  
41 274 among MetS's components, only central obesity and hyper-triglyceride significantly elevated the  
42  
43 275 risk of leukoplakia. These results were inconsistent with the previous study that found only  
44  
45 276 hyper-triglyceride and hyperglycemia significantly increased risk of leukoplakia [8]. Considering  
46  
47 277 of hyper-triglyceride in leukoplakia, previous study reported significantly higher triglyceride  
48  
49 278 level in leukoplakia than healthy people [33]. An increasing triglyceride was possibly due to the  
50  
51 279 excessive release of free fatty acids, which resulted from insulin resistance. Moreover, insulin  
52  
53  
54  
55  
56  
57  
58  
59  
60

1  
2  
3 280 resistance can be stimulated by central obesity. In addition, Meisel et al, reported that visceral  
4  
5 281 obesity was more likely to be found in people with leukoplakia than those of non-leukoplakia  
6  
7 282 [34]. The aforementioned studies support our findings that two of MetS's components, central  
8  
9 283 obesity and hyper-triglyceride, associated with leukoplakia. However, the mechanism to explain  
10  
11 284 this is still unclear.

12  
13  
14 285 Even though our study demonstrated that hyperglycemia did not significantly increase the  
15  
16 286 risk of OSF, the aRR showed the largest increased risk magnitude in OSF. Regarding OSF, it has  
17  
18 287 been recognized that the development of fibrosis is the pathologically responsible for tissue injury  
19  
20 288 caused by chronic hyperglycemia. The development of fibrosis was driven by the accumulation of  
21  
22 289 extracellular matrix (ECM) [35].

23  
24  
25 290 One of the unique characteristics of OSF is the symptom of mouth opening restriction [36],  
26  
27 291 [37,38]. A possible causation for restricted mouth opening might be because of dynamics of ECM  
28  
29 292 deposited around muscle fibers in different stages of OSF, and these lead to the consequence of  
30  
31 293 loss of variety of ECM molecules including elastin into the uniform of collagen type I replacing  
32  
33 294 muscle fibers [39]. Notably, it has been shown that hyperglycemia can alter the collagenolysis [40]  
34  
35 295 and also ECM's components interaction through advanced glycation end products (AGEs)  
36  
37 296 modification [41-42]. These reasons mentioned above may support the borderline impact of  
38  
39 297 hyperglycemia on OSF and its symptom.

40  
41  
42 298 Another possibility of the discordance between these findings might be due to the  
43  
44 299 difference of study approaches and community which dietary habits differed from each other.  
45  
46 300 However, both studies pointed out that the hyper-triglyceride and hyperglycemia were related to  
47  
48 301 OPMD. Exceptionally to those biological aspects, these results are supported by strong  
49  
50  
51  
52  
53  
54  
55  
56  
57  
58  
59  
60

1  
2  
3 302 epidemiological study design in which we followed up the study population from being OPMD-  
4  
5 303 free until occurrence of OPMD.  
6

7  
8 304 In the view of oral cancer control, primary prevention aims to reduce the exposure to risk  
9  
10 305 factors. In Taiwan, several cessation campaigns have been launched but most of these efforts were  
11  
12 306 considered just for conventional risk factors including cigarette smoking and betel nut chewing.  
13  
14 307 Our study result showed that MetS was one of risk factor for OPMD. In addition, a recent study  
15  
16 308 also revealed that sweet beverage consumption elevated risk of overall cancer and breast cancer  
17  
18 309 [43]. Promoting MetS prevention program after controlling for sugar-sweetened beverage or diet  
19  
20 310 might reduce OPMD and oral cancer incidence in the future.  
21  
22

23  
24 311 Several limitations existed in our study. First, several confounding factors that may link  
25  
26 312 MetS and oral cancer, such as family history of oral cancer and history of chronic diseases other  
27  
28 313 than MetS, were not considered. Second, the results of our study were derived from Taiwanese  
29  
30 314 aged over 30, so that external generalization of our results to other regions would be limited  
31  
32 315 especially on ethnic genetic and dietary background. Third, the association between MetS and  
33  
34 316 verrucous hyperplasia, erythroplakia, and erythroleukoplakia should be interpreted with great  
35  
36 317 caution, due to scanty of cases in our population. Fourth, there exits possible information bias for  
37  
38 318 self-reported variables, especially oral habits. Betel nut chewing, smoking, and alcohol drinking  
39  
40 319 are behaviors that are deviant from social norms and regulations, and can be possibly under-  
41  
42 320 reported. Evidence on this phenomena has been shown in reporting smoking behavior [44, 45].  
43  
44 321 This might explain the 38 subjects of OSF who had reported never betel quid chewing, which  
45  
46 322 contradicts the well-known association between OSF and betel quid chewing.  
47  
48  
49  
50  
51  
52  
53  
54  
55  
56  
57  
58  
59  
60

1  
2  
3 323 In conclusion, our prospective cohort study design affirmed the direction that MetS  
4  
5 324 elevated risk of OPMD. This epidemiological evidence would lead new insight for policy makers  
6  
7  
8 325 to promote MetS prevention in order to reduce OPMD and oral cancer in the future.  
9  
10  
11  
12  
13  
14  
15  
16  
17  
18  
19  
20  
21  
22  
23  
24  
25  
26  
27  
28  
29  
30  
31  
32  
33  
34  
35  
36  
37  
38  
39  
40  
41  
42  
43  
44  
45  
46  
47  
48  
49  
50  
51  
52  
53  
54  
55  
56  
57  
58  
59  
60

For peer review only

1  
2  
3 326 **Acknowledgements:** We would like to thank the Taiwan Cancer registry and Changhua Health  
4  
5 327 bureau for information on screening and cancer registry data.  
6

7  
8 328 **Contributors:** P Siewchaisakul, ST-W, YP-Y, and AMF-Y conceived conceptualization, and  
9  
10 329 methodology. SM-P and YP-Y contributed to data curation, investigation. P Siewchaisakul, CLS,  
11  
12 330 and AMF-Y carried out statistical analysis. P Siewchaisakul and ST-W wrote original draft. This  
13  
14 331 study was supervised by YP-Y and AMF-Y. CTH-H and P Sarakarn participated in editing  
15  
16 332 manuscript. All authors have reviewed and approved the final manuscript  
17  
18

19 333 **Funding:** This work was supported by Ministry of Science and Technology, Taiwan (MOST 108-  
20  
21 334 2118-M-038 -001 -MY3 and MOST 108-2118-M-038 -002 -MY3)  
22  
23

24 335 **Conflicts of interest:** None  
25

26 336 **Ethics approval:** This study was approved by the Institutional Review Board of Taipei Medical  
27  
28 337 University (TMU-JIRB: N201611014).  
29

30  
31 338 **Provenance and peer review** Not commissioned; externally peer reviewed.  
32

33 339 **Data sharing statement:** No additional data are available.  
34

35 340 **Patient consent for publication:** Not required.  
36  
37  
38  
39  
40  
41  
42  
43  
44  
45  
46  
47  
48  
49  
50  
51  
52  
53  
54  
55  
56  
57  
58  
59  
60

## References

1. Warnakulasuriya S. Clinical features and presentation of oral potentially malignant disorders. *Oral Surg Oral Med Oral Pathol Oral Radiol*. 2018;125(6):582-590. doi:10.1016/j.oooo.2018.03.011
2. Sankaranarayanan R, Ramadas K, Amarasinghe H, Subramanian S, Johnson N. Oral Cancer: Prevention, Early Detection, and Treatment. In: Gelband H, Jha P, Sankaranarayanan R, Horton S, eds. *Cancer: Disease Control Priorities, Third Edition (Volume 3)*. The International Bank for Reconstruction and Development / The World Bank; 2015. Accessed October 13, 2019. <http://www.ncbi.nlm.nih.gov/books/NBK343649/>
3. Axell T, Holmstrup P, Kramer IRH, Pindborg JJ, Shear M. International seminar on oral leukoplakia and associated lesions related to tobacco habits. *Community Dent Oral Epidemiol*. 1984;12(3):145-154. doi:10.1111/j.1600-0528.1984.tb01428.x
4. Juntanong N, Siewchaisakul P, Bradshaw P, et al. Prevalence and Factors Associated with Oral Pre-malignant Lesions in Northeast Thailand. *Asian Pac J Cancer Prev*. 2016;17(8):4175-4179.
5. Esposito K, Chiodini P, Colao A, Lenzi A, Giugliano D. Metabolic Syndrome and Risk of Cancer. *Diabetes Care*. 2012;35(11):2402-2411. doi:10.2337/dc12-0336
6. Stocks T, Bjørge T, Ulmer H, et al. Metabolic risk score and cancer risk: pooled analysis of seven cohorts. *Int J Epidemiol*. 2015;44(4):1353-1363. doi:10.1093/ije/dyv001
7. Chang C-C, Lin M-S, Chen Y-T, Tu L-T, Jane S-W, Chen M-Y. Metabolic syndrome and health-related behaviours associated with pre-oral cancerous lesions among adults aged 20–80 years in Yunlin County, Taiwan: a cross-sectional study. *BMJ Open*. 2015;5(12). doi:10.1136/bmjopen-2015-008788
8. Yen AM-F, Chen SL-S, Chiu SY-H, Chen H-H. Association between metabolic syndrome and oral pre-malignancy: A community- and population-based study (KCIS No. 28). *Oral Oncol*. 2011;47(7):625-630. doi:10.1016/j.oraloncology.2011.04.011
9. Chiang CP, Wu HY, Liu BY, Wang JT, Kuo MYP. Quantitative analysis of immunocompetent cells in oral submucous fibrosis in Taiwan. *Oral Oncol*. 2002;38(1):56-63.
10. Ujpal M, Matos O, Bibok G, Somogyi A, Szabó G, Suba Z. Diabetes and oral tumors in Hungary: epidemiological correlations. *Diabetes Care*. 2004;27(3):770-774. doi:10.2337/diacare.27.3.770
11. Yeh Y-P, Hu T-H, Cho P-Y, et al. Evaluation of Abdominal Ultrasonography Mass Screening for Hepatocellular Carcinoma in Taiwan. *Hepatol Baltim Md*. 2014;59(5):1840-1849. doi:10.1002/hep.26703
12. Chuang S-L, Su WW-Y, Chen SL-S, et al. Population-based screening program for reducing oral cancer mortality in 2,334,299 Taiwanese cigarette smokers and/or betel quid chewers. *Cancer*. 2017;123(9):1597-1609. doi:10.1002/cncr.30517
13. Chen TH-H, Chiu Y-H, Luh D-L, et al. Community-based multiple screening model: design, implementation, and analysis of 42,387 participants. *Cancer*. 2004;100(8):1734-1743. doi:10.1002/cncr.20171

14. Alberti KGMM, Zimmet P, Shaw J, IDF Epidemiology Task Force Consensus Group. The metabolic syndrome--a new worldwide definition. *Lancet Lond Engl*. 2005;366(9491):1059-1062. doi:10.1016/S0140-6736(05)67402-8
15. Shiu M-N, Chen T-H. Impact of betel quid, tobacco and alcohol on three-stage disease natural history of oral leukoplakia and cancer: implication for prevention of oral cancer. *Eur J Cancer Prev*. 2004;13(1):39-45.
16. Yen AM-F, Chen S-C, Chen TH-H. Dose-response relationships of oral habits associated with the risk of oral pre-malignant lesions among men who chew betel quid. *Oral Oncol*. 2007;43(7):634-638. doi:10.1016/j.oraloncology.2006.05.001
17. Ouchi N, Parker JL, Lugus JJ, Walsh K. Adipokines in inflammation and metabolic disease. *Nat Rev Immunol*. 2011;11(2):85-97. doi:10.1038/nri2921
18. Prasad K. C-Reactive Protein Increases Oxygen Radical Generation by Neutrophils: *J Cardiovasc Pharmacol Ther*. Published online June 29, 2016. doi:10.1177/107424840400900308
19. Feller L, Altini M, Lemmer J. Inflammation in the context of oral cancer. *Oral Oncol*. 2013;49(9):887-892. doi:10.1016/j.oraloncology.2013.07.003
20. Hsu H-J, Yang Y-H, Shieh T-Y, et al. Role of cytokine gene (interferon- $\gamma$ , transforming growth factor- $\beta$ 1, tumor necrosis factor- $\alpha$ , interleukin-6, and interleukin-10) polymorphisms in the risk of oral precancerous lesions in Taiwanese. *Kaohsiung J Med Sci*. 2014;30(11):551-558. doi:10.1016/j.kjms.2014.09.003
21. Bellastella G, Scappaticcio L, Esposito K, Giugliano D, Maiorino MI. Metabolic syndrome and cancer: "The common soil hypothesis." *Diabetes Res Clin Pract*. 2018;143:389-397. doi:10.1016/j.diabres.2018.05.024
22. Yunusova NV, Spirina LV, Frolova AE, Afanas'ev SG, Kolegova ES, Kondakova IV. Association of IGFBP-6 Expression with Metabolic Syndrome and Adiponectin and IGF-IR Receptor Levels in Colorectal Cancer. *Asian Pac J Cancer Prev APJCP*. 2016;17(8):3963-3969.
23. Zhang Cuilin, Rexrode Kathryn M., van Dam Rob M., Li Tricia Y., Hu Frank B. Abdominal Obesity and the Risk of All-Cause, Cardiovascular, and Cancer Mortality. *Circulation*. 2008;117(13):1658-1667. doi:10.1161/CIRCULATIONAHA.107.739714
24. Owolabi EO, Ter Goon D, Adeniyi OV. Central obesity and normal-weight central obesity among adults attending healthcare facilities in Buffalo City Metropolitan Municipality, South Africa: a cross-sectional study. *J Health Popul Nutr*. 2017;36(1):54. doi:10.1186/s41043-017-0133-x
25. Lee B-J, Chan M-Y, Hsiao H-Y, Chang C-H, Hsu L-P, Lin P-T. Relationship of Oxidative Stress, Inflammation, and the Risk of Metabolic Syndrome in Patients with Oral Cancer. *Oxid Med Cell Longev*. 2018;2018. doi:10.1155/2018/9303094
26. Chen P-H, Mahmood Q, Mariottini GL, Chiang T-A, Lee K-W. Adverse Health Effects of Betel Quid and the Risk of Oral and Pharyngeal Cancers. *BioMed Research International*. doi:10.1155/2017/3904098
27. Lee C-H, Ko Y-C, Huang H-L, et al. The precancer risk of betel quid chewing, tobacco use and alcohol consumption in oral leukoplakia and oral submucous fibrosis in southern Taiwan. *Br J Cancer*. 2003;88(3):366-372. doi:10.1038/sj.bjc.6600727



- 1
  - 2
  - 3
  - 4
  - 5
  - 6
  - 7
  - 8
  - 9
  - 10
  - 11
  - 12
  - 13
  - 14
  - 15
  - 16
  - 17
  - 18
  - 19
  - 20
  - 21
  - 22
  - 23
  - 24
  - 25
  - 26
  - 27
  - 28
  - 29
  - 30
  - 31
  - 32
  - 33
  - 34
  - 35
  - 36
  - 37
  - 38
  - 39
  - 40
  - 41
  - 42
  - 43
  - 44
  - 45
  - 46
  - 47
  - 48
  - 49
  - 50
  - 51
  - 52
  - 53
  - 54
  - 55
  - 56
  - 57
  - 58
  - 59
  - 60
28. Ozawa M, Shipley M, Kivimaki M, Singh-Manoux A, Brunner EJ. Dietary pattern, inflammation and cognitive decline: The Whitehall II prospective cohort study. *Clin Nutr Edinb Scotl.* 2017;36(2):506-512. doi:10.1016/j.clnu.2016.01.013
29. Silveira BKS, Oliveira TMS, Andrade PA, Hermsdorff HHM, Rosa C de OB, Franceschini S do CC. Dietary Pattern and Macronutrients Profile on the Variation of Inflammatory Biomarkers: Scientific Update. *Cardiol Res Pract.* 2018;2018. doi:10.1155/2018/4762575
30. Fann JC-Y, Lai H, Chiu SY-H, Yen AM-F, Chen SL-S, Chen H-H. A population-based study on the association between the intake of soft drinks and periodontal disease in Taiwanese adults aged 35-44 years (KCIS no. 33). *Public Health Nutr.* 2016;19(8):1471-1478. doi:10.1017/S1368980015002608
31. Maserejian NN, Giovannucci E, Rosner B, Zavras A, Joshipura K. Prospective Study of Fruits and Vegetables and Risk of Oral Premalignant Lesions in Men. *Am J Epidemiol.* 2006;164(6):556-566. doi:10.1093/aje/kwj233
32. Lee M, Lim M, Kim J. Fruit and vegetable consumption and the metabolic syndrome: a systematic review and dose-response meta-analysis. *Br J Nutr.* 2019;122(7):723-733. doi:10.1017/S000711451900165X
33. Granero Fernandez M, Lopez-Jornet P. Association between smoking, glycaemia, blood lipoproteins and risk of oral leukoplakia. *Aust Dent J.* 2017;62(1):47-51. doi:10.1111/adj.12431
34. Meisel P, Dau M, Sümnick W, et al. Association between glycemia, serum lipoproteins, and the risk of oral leukoplakia: the population-based Study of Health in Pomerania (SHIP). *Diabetes Care.* 2010;33(6):1230-1232. doi:10.2337/dc09-1262
35. Ban CR, Twigg SM. Fibrosis in diabetes complications: Pathogenic mechanisms and circulating and urinary markers. *Vasc Health Risk Manag.* 2008;4(3):575-596.
36. Angadi PV, Rekha KP. Oral submucous fibrosis: a clinicopathologic review of 205 cases in Indians. *Oral Maxillofac Surg.* 2011;15(1):15-19. doi:10.1007/s10006-010-0225-x
37. Shih Y-H, Wang T-H, Shieh T-M, Tseng Y-H. Oral Submucous Fibrosis: A Review on Etiopathogenesis, Diagnosis, and Therapy. *Int J Mol Sci.* 2019;20(12):2940. doi:10.3390/ijms20122940
38. Fang C-Y, Hsia S-M, Hsieh P-L, et al. Slug mediates myofibroblastic differentiation to promote fibrogenesis in buccal mucosa. *J Cell Physiol.* 2019;234(5):6721-6730. doi:10.1002/jcp.27418
39. Utsunomiya H, Tilakaratne WM, Oshiro K, et al. Extracellular matrix remodeling in oral submucous fibrosis: its stage-specific modes revealed by immunohistochemistry and in situ hybridization. *J Oral Pathol Med Off Publ Int Assoc Oral Pathol Am Acad Oral Pathol.* 2005;34(8):498-507. doi:10.1111/j.1600-0714.2005.00339.x
40. Stultz CM, Edelman ER. A Structural Model that Explains the Effects of Hyperglycemia on Collagenolysis. *Biophys J.* 2003;85(4):2198-2204.
41. Singh VP, Bali A, Singh N, Jaggi AS. Advanced glycation end products and diabetic complications. *Korean J Physiol Pharmacol Off J Korean Physiol Soc Korean Soc Pharmacol.* 2014;18(1):1-14. doi:10.4196/kjpp.2014.18.1.1

- 1  
2  
3 42. Pastino AK, Greco TM, Mathias RA, Cristea IM, Schwarzbauer JE. Stimulatory effects of  
4 advanced glycation endproducts (AGEs) on fibronectin matrix assembly. *Matrix Biol J Int Soc*  
5 *Matrix Biol.* 2017;59:39-53. doi:10.1016/j.matbio.2016.07.003  
6  
7 43. Chazelas E, Srouf B, Desmetz E, et al. Sugary drink consumption and risk of cancer: results  
8 from NutriNet-Santé prospective cohort. *BMJ.* 2019;366. doi:10.1136/bmj.12408  
9  
10 44. Gnams T, Kaspar K. Disclosure of sensitive behaviors across self-administered survey modes:  
11 a meta-analysis. *Behav Res Methods.* 2015;47(4):1237-1259. doi:10.3758/s13428-014-0533-4  
12  
13 45. Gorber SC, Schofield-Hurwitz S, Hardt J, Levasseur G, Tremblay M. The accuracy of self-  
14 reported smoking: A systematic review of the relationship between self-reported and cotinine-  
15 assessed smoking status. *Nicotine Tob Res.* 2009;11(1):12-24. doi:10.1093/ntr/ntn010  
16  
17  
18  
19  
20  
21  
22  
23  
24  
25  
26  
27  
28  
29  
30  
31  
32  
33  
34  
35  
36  
37  
38  
39  
40  
41  
42  
43  
44  
45  
46  
47  
48  
49  
50  
51  
52  
53  
54  
55  
56  
57  
58  
59  
60

For peer review only

1  
2  
3  
4 **Figure Legend**  
5  
6  
7  
8  
9

10 **Figure 1 The flow chart for prospective normal cohort study design**  
11  
12  
13  
14  
15  
16  
17  
18  
19  
20  
21  
22  
23  
24  
25  
26  
27  
28  
29  
30  
31  
32  
33  
34  
35  
36  
37  
38  
39  
40  
41  
42  
43  
44  
45  
46  
47  
48  
49  
50  
51  
52  
53  
54  
55  
56  
57  
58  
59  
60

For peer review only

**Table 1 The incidence (per 1,000) of oral potentially malignant disorders by demographic features, status of metabolic syndrome and other associated risk factors**

|                             | N      | Person years | OPMD |       | OSF |      | leukoplakia |       | Verrucous hyperplasia |      | Erykoplakia+ Erythroleukoplakia |      |
|-----------------------------|--------|--------------|------|-------|-----|------|-------------|-------|-----------------------|------|---------------------------------|------|
|                             |        |              | No.  | %     | No. | %    | No.         | %     | No.                   | %    | No.                             | %    |
| <b>Overall</b>              | 17,590 | 116732.06    | 716  | 6.13  | 149 | 1.28 | 521         | 4.46  | 20                    | 0.17 | 26                              | 0.22 |
| <b>Metabolic Syndrome</b>   |        |              |      |       |     |      |             |       |                       |      |                                 |      |
| Yes                         | 5,789  | 38416.38     | 295  | 7.68  | 58  | 1.51 | 219         | 5.70  | 7                     | 0.18 | 11                              | 0.29 |
| No                          | 11,801 | 78315.68     | 421  | 5.38  | 91  | 1.16 | 302         | 3.86  | 13                    | 0.17 | 15                              | 0.19 |
| <b>Age</b>                  |        |              |      |       |     |      |             |       |                       |      |                                 |      |
| 30-39                       | 1,178  | 8296.07      | 47   | 5.67  | 13  | 1.57 | 28          | 3.38  | 1                     | 0.12 | 5                               | 0.60 |
| 40-49                       | 4,359  | 29193.98     | 210  | 7.19  | 42  | 1.44 | 154         | 5.28  | 8                     | 0.27 | 6                               | 0.21 |
| 50-59                       | 5,538  | 35137.59     | 267  | 7.60  | 48  | 1.37 | 205         | 5.83  | 6                     | 0.17 | 8                               | 0.23 |
| 60-69                       | 4,176  | 27778.33     | 160  | 5.76  | 37  | 1.33 | 115         | 4.14  | 4                     | 0.14 | 4                               | 0.14 |
| 70+                         | 2,339  | 16326.09     | 32   | 1.96  | 9   | 0.55 | 19          | 1.16  | 1                     | 0.06 | 3                               | 0.18 |
| <b>Sex</b>                  |        |              |      |       |     |      |             |       |                       |      |                                 |      |
| Male                        | 15,619 | 104569.65    | 703  | 6.72  | 146 | 1.40 | 511         | 4.89  | 20                    | 0.19 | 26                              | 0.25 |
| Female                      | 1,971  | 12162.41     | 13   | 1.07  | 3   | 0.25 | 10          | 0.82  | 0                     | 0.00 | 0                               | 0.00 |
| <b>Education</b>            |        |              |      |       |     |      |             |       |                       |      |                                 |      |
| University                  | 2140   | 13691.15     | 53   | 3.87  | 4   | 0.29 | 47          | 3.43  | 1                     | 0.07 | 1                               | 0.07 |
| Senior high school          | 4173   | 26814.93     | 174  | 6.49  | 39  | 1.45 | 126         | 4.70  | 3                     | 0.11 | 6                               | 0.22 |
| Junior high school or lower | 11228  | 75877.21     | 487  | 6.42  | 106 | 1.40 | 347         | 4.57  | 16                    | 0.21 | 18                              | 0.24 |
| <b>Betel quid chewing</b>   |        |              |      |       |     |      |             |       |                       |      |                                 |      |
| Never                       | 11,925 | 79006.46     | 256  | 3.24  | 38  | 0.48 | 203         | 2.57  | 10                    | 0.13 | 5                               | 0.06 |
| Quit*                       | 3,544  | 23719.97     | 236  | 9.95  | 62  | 2.61 | 162         | 6.83  | 6                     | 0.25 | 6                               | 0.25 |
| Current                     | 2,110  | 13920.02     | 224  | 16.09 | 49  | 3.52 | 156         | 11.21 | 4                     | 0.29 | 15                              | 1.08 |
| <b>Smoking</b>              |        |              |      |       |     |      |             |       |                       |      |                                 |      |
| Never                       | 6,976  | 46286.91     | 101  | 2.18  | 21  | 0.45 | 75          | 1.62  | 1                     | 0.02 | 4                               | 0.09 |
| Quit*                       | 3,656  | 24678.95     | 126  | 5.11  | 36  | 1.46 | 82          | 3.32  | 3                     | 0.12 | 5                               | 0.20 |
| Current                     | 6,947  | 45680.37     | 489  | 10.70 | 92  | 2.01 | 364         | 7.97  | 16                    | 0.35 | 17                              | 0.37 |

|    |                                  |        |          |     |      |     |      |     |      |    |      |    |      |
|----|----------------------------------|--------|----------|-----|------|-----|------|-----|------|----|------|----|------|
| 1  |                                  |        |          |     |      |     |      |     |      |    |      |    |      |
| 2  |                                  |        |          |     |      |     |      |     |      |    |      |    |      |
| 3  |                                  |        |          |     |      |     |      |     |      |    |      |    |      |
| 4  |                                  |        |          |     |      |     |      |     |      |    |      |    |      |
| 5  | <b>Alcohol drinking</b>          |        |          |     |      |     |      |     |      |    |      |    |      |
| 6  | Never                            | 8,041  | 53484.46 | 212 | 3.96 | 48  | 0.90 | 155 | 2.90 | 4  | 0.07 | 5  | 0.09 |
| 7  |                                  |        |          |     |      |     |      |     |      |    |      |    |      |
| 8  | Quit*                            | 1,009  | 6798.76  | 58  | 8.53 | 10  | 1.47 | 44  | 6.47 | 2  | 0.29 | 2  | 0.29 |
| 9  | Current                          | 8,529  | 56365.96 | 446 | 7.91 | 91  | 1.61 | 322 | 5.71 | 14 | 0.25 | 19 | 0.34 |
| 10 | <b>BMI (kg/m2)</b>               |        |          |     |      |     |      |     |      |    |      |    |      |
| 11 | <18.5                            | 422    | 2852.29  | 9   | 3.16 | 5   | 1.75 | 3   | 1.05 | 0  | 0.00 | 1  | 0.35 |
| 12 | 18.5-24.9                        | 8,844  | 58824.11 | 313 | 5.32 | 66  | 1.12 | 221 | 3.76 | 13 | 0.22 | 13 | 0.22 |
| 13 | >25                              | 8,324  | 55055.66 | 394 | 7.16 | 78  | 1.42 | 297 | 5.39 | 7  | 0.13 | 12 | 0.22 |
| 14 | <b>Triglyceride (mg/dl)</b>      |        |          |     |      |     |      |     |      |    |      |    |      |
| 15 | <150                             | 12,178 | 81399.38 | 405 | 4.98 | 87  | 1.07 | 289 | 3.55 | 14 | 0.17 | 15 | 0.18 |
| 16 | ≥150                             | 5,412  | 35332.68 | 311 | 8.80 | 62  | 1.75 | 232 | 6.57 | 6  | 0.17 | 11 | 0.31 |
| 17 | <b>HDL-C (mg/dl) **</b>          |        |          |     |      |     |      |     |      |    |      |    |      |
| 18 | Abnormal                         | 5,684  | 37372.54 | 268 | 7.17 | 50  | 1.34 | 204 | 5.46 | 5  | 0.13 | 9  | 0.24 |
| 19 | Normal                           | 11,781 | 78407.84 | 441 | 5.62 | 98  | 1.25 | 312 | 3.98 | 14 | 0.18 | 17 | 0.22 |
| 20 |                                  |        |          |     |      |     |      |     |      |    |      |    |      |
| 21 | <b>Blood pressure (mm/Hg)***</b> |        |          |     |      |     |      |     |      |    |      |    |      |
| 22 | Normal                           | 10,869 | 71713.89 | 440 | 6.14 | 94  | 1.31 | 321 | 4.48 | 12 | 0.17 | 13 | 0.18 |
| 23 | Elevated risk                    | 2,858  | 19152.31 | 127 | 6.63 | 23  | 1.20 | 91  | 4.75 | 7  | 0.37 | 6  | 0.31 |
| 24 | Hypertension                     | 3,863  | 25865.86 | 149 | 5.76 | 32  | 1.24 | 109 | 4.21 | 1  | 0.04 | 7  | 0.27 |
| 25 |                                  |        |          |     |      |     |      |     |      |    |      |    |      |
| 26 | <b>Glucose (mg/dl)</b>           |        |          |     |      |     |      |     |      |    |      |    |      |
| 27 | <100                             | 11,974 | 78755.06 | 454 | 5.76 | 90  | 1.14 | 332 | 4.22 | 13 | 0.17 | 19 | 0.24 |
| 28 | 100-125                          | 3,907  | 26462.49 | 165 | 6.24 | 37  | 1.40 | 120 | 4.53 | 5  | 0.19 | 3  | 0.11 |
| 29 | >125                             | 1,709  | 11514.51 | 97  | 8.42 | 22  | 1.91 | 69  | 5.99 | 2  | 0.17 | 4  | 0.35 |
| 30 |                                  |        |          |     |      |     |      |     |      |    |      |    |      |
| 31 | <b>Meat</b>                      |        |          |     |      |     |      |     |      |    |      |    |      |
| 32 | Seldom                           | 4,820  | 31984.38 | 171 | 5.35 | 38  | 1.19 | 127 | 3.97 | 3  | 0.09 | 3  | 0.09 |
| 33 | Infrequent                       | 11,904 | 78845.33 | 488 | 6.19 | 94  | 1.19 | 360 | 4.57 | 13 | 0.16 | 21 | 0.27 |
| 34 | Frequent                         | 829    | 5625.25  | 56  | 9.96 | 17  | 3.02 | 33  | 5.87 | 4  | 0.71 | 2  | 0.36 |
| 35 | <b>Vegetable</b>                 |        |          |     |      |     |      |     |      |    |      |    |      |
| 36 | Seldom                           | 3,679  | 24216.53 | 172 | 7.10 | 42  | 1.73 | 124 | 5.12 | 1  | 0.04 | 5  | 0.21 |
| 37 | Infrequent                       | 13,469 | 89529.87 | 527 | 5.89 | 105 | 1.17 | 384 | 4.29 | 19 | 0.21 | 19 | 0.21 |
| 38 | Frequent                         | 308    | 2045.50  | 6   | 2.93 | 0   | 0.00 | 6   | 2.93 | 0  | 0.00 | 0  | 0.00 |
| 39 |                                  |        |          |     |      |     |      |     |      |    |      |    |      |
| 40 |                                  |        |          |     |      |     |      |     |      |    |      |    |      |
| 41 |                                  |        |          |     |      |     |      |     |      |    |      |    |      |
| 42 |                                  |        |          |     |      |     |      |     |      |    |      |    |      |
| 43 |                                  |        |          |     |      |     |      |     |      |    |      |    |      |
| 44 |                                  |        |          |     |      |     |      |     |      |    |      |    |      |
| 45 |                                  |        |          |     |      |     |      |     |      |    |      |    |      |
| 46 |                                  |        |          |     |      |     |      |     |      |    |      |    |      |

| <b>Fruit</b> |       |          |     |      |    |      |     |      |    |      |    |      |
|--------------|-------|----------|-----|------|----|------|-----|------|----|------|----|------|
| Seldom       | 1,608 | 10685.41 | 102 | 9.55 | 20 | 1.87 | 75  | 7.02 | 2  | 0.19 | 5  | 0.47 |
| Infrequent   | 7,190 | 47575.85 | 333 | 7.00 | 74 | 1.56 | 233 | 4.90 | 10 | 0.21 | 16 | 0.34 |
| Frequent     | 8,773 | 58318.08 | 280 | 4.80 | 55 | 0.94 | 212 | 3.64 | 8  | 0.14 | 5  | 0.09 |

**OSF**: oral submucosa fibrosis; **\*Quit**: Quit betel quid chewing, quit smoking or quit alcohol drinking defined as who had ever these oral habits; however no longer have these habit at the day of interview.

**\*\*HDL-C**: Abnormal defined as (Male with  $0 < \text{HDL} < 40$ ) or (Female with  $0 < \text{HDL} < 50$ ), Normal defined as (Male with  $40 \leq \text{HDL}$ ) or (Female with  $50 \leq \text{HDL}$ )

**\*\*\*Hypertension**: Normal defined as systolic blood pressure (sbp)  $< 130$  or diastolic blood pressure (dbp)  $< 85$ , Elevated risk defined as  $130 \leq \text{sbp} < 140$  or  $85 \leq \text{dbp} < 90$ , Hypertension defined as  $\text{sbp} \geq 140$  or  $\text{dbp} \geq 90$

**Table 2 The association between MetS, other factors and oral potentially malignant disorders (MetS → OPMD)**

|                                                         | RR   | 95% CI     | aRR  | 95% CI    |
|---------------------------------------------------------|------|------------|------|-----------|
| <b>Metabolic syndrome</b>                               |      |            |      |           |
| Yes vs No                                               | 1.42 | 1.22 1.66  | 1.33 | 1.14 1.55 |
| <b>Sex</b>                                              |      |            |      |           |
| Male vs Female                                          | 7.14 | 3.94 12.94 | 3.49 | 1.89 6.44 |
| <b>Age groups (vs 70+)</b>                              |      |            |      |           |
| 30-39                                                   | 2.89 | 1.85 4.52  | 2.17 | 1.35 3.47 |
| 40-49                                                   | 3.53 | 2.43 5.12  | 2.63 | 1.79 3.85 |
| 50-59                                                   | 3.63 | 2.52 5.24  | 3.10 | 2.14 4.49 |
| 60-69                                                   | 2.85 | 1.95 4.16  | 2.53 | 1.73 3.71 |
| <b>Betel nut chewing (vs Never)</b>                     |      |            |      |           |
| Quit*                                                   | 3.03 | 2.54 3.63  | 2.00 | 1.62 2.47 |
| Current                                                 | 4.92 | 4.10 5.89  | 2.68 | 2.16 3.33 |
| <b>Cigarette smoking (vs Never)</b>                     |      |            |      |           |
| Quit*                                                   | 2.32 | 1.78 3.03  | 1.31 | 0.96 1.78 |
| Current                                                 | 4.90 | 3.94 6.09  | 2.47 | 1.90 3.20 |
| <b>Alcohol drinking (vs Never)</b>                      |      |            |      |           |
| Quit*                                                   | 2.18 | 1.62 2.92  | 1.23 | 0.90 1.68 |
| Current                                                 | 1.95 | 1.65 2.30  | 1.03 | 0.86 1.23 |
| <b>Meat (vs Seldom)</b>                                 |      |            |      |           |
| Infrequent                                              | 1.13 | 0.95 1.35  | 0.95 | 0.79 1.13 |
| Frequent                                                | 1.77 | 1.30 2.41  | 1.23 | 0.90 1.68 |
| <b>Vegetable (vs Seldom)</b>                            |      |            |      |           |
| Infrequent                                              | 0.83 | 0.70 0.99  | 0.92 | 0.77 1.10 |
| Frequent                                                | 0.36 | 0.15 0.87  | 0.46 | 0.19 1.11 |
| <b>Fruit (vs Seldom)</b>                                |      |            |      |           |
| Infrequent                                              | 0.74 | 0.59 0.93  | 0.91 | 0.72 1.15 |
| Frequent                                                | 0.51 | 0.40 0.64  | 0.79 | 0.62 1.00 |
| <b>Education level (vs Junior high school or lower)</b> |      |            |      |           |
| Senior high school                                      | 1.00 | 0.84 1.19  | 0.97 | 0.80 1.17 |
| University                                              | 0.60 | 0.45 0.81  | 0.84 | 0.62 1.14 |

**aRR:** adjusted rate ratio; **CI:** confidence interval; **\*Quit:** quit betel quid chewing, quit smoking or quit alcohol drinking defined as who had ever these oral habits; however no longer have these habits at the day of interview.

**Table 3 The effect of metabolic syndrome components on oral potentially malignant disorders**

|                                        | All OPMD |        |      | p-value |
|----------------------------------------|----------|--------|------|---------|
|                                        | aRR*     | 95% CI |      |         |
| <b>Component of metabolic syndrome</b> |          |        |      |         |
| Central obesity                        | 1.22     | 1.04   | 1.44 | 0.0162  |
| Hyper-triglyceride                     | 1.26     | 1.07   | 1.49 | 0.0066  |
| Low HDL-C                              | 1.12     | 0.95   | 1.32 | 0.1851  |
| Elevated blood pressure                | 0.93     | 0.79   | 1.09 | 0.3586  |
| Hyperglycemia                          | 1.20     | 1.02   | 1.41 | 0.0297  |
| <b>Metabolic syndrome score</b>        | 1.14     | 1.08   | 1.20 | <.0001  |

**aRR**: adjusted rate ratio; **CI**: confidence interval.

\* adjusted rate ratio for components of metabolic syndrome and metabolic syndrome score were treated in different models with adjustment of age, sex, education level, betel nut chewing, cigarette smoking, alcohol drinking, meat, vegetable and fruit consumption.



1  
2  
3  
4  
5  
6  
7  
8  
9  
10  
11  
12  
13  
14  
15  
16  
17  
18  
19  
20  
21  
22  
23  
24  
25  
26  
27  
28  
29  
30  
31  
32  
33  
34  
35  
36  
37  
38  
39  
40  
41  
42  
43  
44  
45  
46

**Table 4 The association between metabolic syndrome and sub-types of oral potentially malignant disorders using multi-variable Poisson regression**

|                                        | <u>Leukoplakia</u> |           | <u>OSF</u> |           | <u>Verrucous hyperplasia</u> |           | <u>Erythroplakia + Erythroleukoplakia</u> |           |
|----------------------------------------|--------------------|-----------|------------|-----------|------------------------------|-----------|-------------------------------------------|-----------|
|                                        | aRR*               | 95% CI    | aRR**      | 95% CI    | aRR***                       | 95% CI    | aRR***                                    | 95% CI    |
| <b>Metabolic syndrome</b>              |                    |           |            |           |                              |           |                                           |           |
| Yes vs No                              | 1.37               | 1.14 1.64 | 1.22       | 0.87 1.71 | 1.33                         | 0.51 3.46 | 1.59                                      | 0.67 3.75 |
| <b>Component of metabolic syndrome</b> |                    |           |            |           |                              |           |                                           |           |
| Central obesity                        | 1.30               | 1.07 1.57 | 1.06       | 0.74 1.52 | 1.17                         | 0.47 2.89 | 0.94                                      | 0.37 2.36 |
| Hyper-triglyceride                     | 1.29               | 1.06 1.57 | 1.21       | 0.83 1.76 | 0.98                         | 0.40 2.40 | 1.39                                      | 0.54 3.58 |
| Low HDL-C                              | 1.17               | 0.97 1.42 | 0.94       | 0.64 1.38 | 0.79                         | 0.31 1.99 | 1.18                                      | 0.47 2.97 |
| Elevated blood pressure                | 0.90               | 0.75 1.09 | 0.95       | 0.66 1.37 | 1.34                         | 0.46 3.85 | 1.22                                      | 0.50 3.00 |
| Hyperglycemia                          | 1.16               | 0.96 1.41 | 1.43       | 0.99 2.05 | 1.28                         | 0.52 3.19 | 0.99                                      | 0.37 2.64 |
| <b>Metabolic syndrome score</b>        | 1.16               | 1.09 1.24 | 1.10       | 0.98 1.24 | 1.02                         | 0.68 1.54 | 1.13                                      | 0.83 1.55 |

**aRR:** adjusted rate ratio; **CI:** confidence interval; **OSF:** oral submucous fibrosis

1  
2  
3  
4  
5 \* adjusted rate ratio for metabolic syndrome, components of metabolic syndrome, and metabolic syndrome score were treated in different  
6 models with adjustment of age, sex, education level, betel nut chewing, cigarette smoking, alcohol drinking, meat, vegetable and fruit  
7 consumption.  
8  
9

10 \*\* adjusted rate ratio for metabolic syndrome, components of metabolic syndrome, and metabolic syndrome score were treated in different  
11 models with adjustment of age, sex, education level, betel nut chewing, cigarette smoking, alcohol drinking, meat, and fruit consumption.  
12  
13

14 \*\*\* adjusted rate ratio for metabolic syndrome, components of metabolic syndrome, and metabolic syndrome score were treated in different  
15 models with adjustment of betel nut chewing and cigarette smoking.  
16  
17  
18  
19  
20  
21  
22  
23  
24  
25  
26  
27  
28  
29  
30  
31  
32  
33  
34  
35  
36  
37  
38  
39  
40  
41  
42  
43  
44  
45  
46

1  
2  
3  
4 “I *Amy Ming-Fang Yen* The Corresponding Author of this article contained within the original  
5 manuscript which includes any diagrams & photographs within and any related or stand alone film  
6 submitted (the Contribution”) has the right to grant on behalf  
7 of all authors and does grant on behalf of all authors, a licence to the BMJ Publishing Group Ltd and  
8 its licencees, to permit this Contribution (if accepted) to be published in the BMJ and any other BMJ  
9  
10  
11  
12 Group products and to exploit all subsidiary rights, as set out in our licence set out at:  
13 [http://www.bmj.com/about-bmj/resources-authors/forms-policies-and-checklists/copyright-open-](http://www.bmj.com/about-bmj/resources-authors/forms-policies-and-checklists/copyright-open-access-and-permission-reuse.”)  
14 [access-and-permission-reuse.”](http://www.bmj.com/about-bmj/resources-authors/forms-policies-and-checklists/copyright-open-access-and-permission-reuse.”)  
15  
16  
17  
18  
19

20 *IF YOU ARE A NATIONAL INSTITUTE OF HEALTH (“NIH”) EMPLOYEE, CONTRACTOR OR*  
21 *TRAINEE* the following cover sheet will be accepted by the BMJ Group and NIH and incorporated into  
22 the above Licence.  
23  
24  
25  
26  
27

28 Please tick **one or more** boxes as appropriate:

- 29  
30  I am the sole author of the Contribution.  
31  I am one author signing on behalf of all co-owners of the Contribution.  
32  
33  The Contribution has been made in the course of my employment and I am signing as  
34 authorised by my employer.  
35  
36  I am a US Federal Government employee acting in the course of my employment.  
37  I am not a US Federal Government employee, but some or all of my co-authors are.  
38  
39  I am an employee of the UK Crown\* acting in the course of my employment  
40  I am a US Federal Government employee acting in the course of my employment.  
41  I am not a US Federal Government employee, but some or all of my co-authors are.  
42  
43  I am an employee of the UK Crown acting in the course of my employment  
44  I am not an employee of the UK Crown acting in the course of my employment but  
45 some/all of my co-authors are.\*  
46  
47  
48

49 \*Such authors should consult the any guidance issued by their employer and if  
50 necessary return any completed form;  
51 [http://www.nationalarchives.gov.uk/documents/information-management/articles-](http://www.nationalarchives.gov.uk/documents/information-management/articles-ministers-civil-servants-annexa.pdf)  
52 [ministers-civil-servants-annexa.pdf](http://www.nationalarchives.gov.uk/documents/information-management/articles-ministers-civil-servants-annexa.pdf)  
53  
54  
55  
56  
57  
58  
59  
60

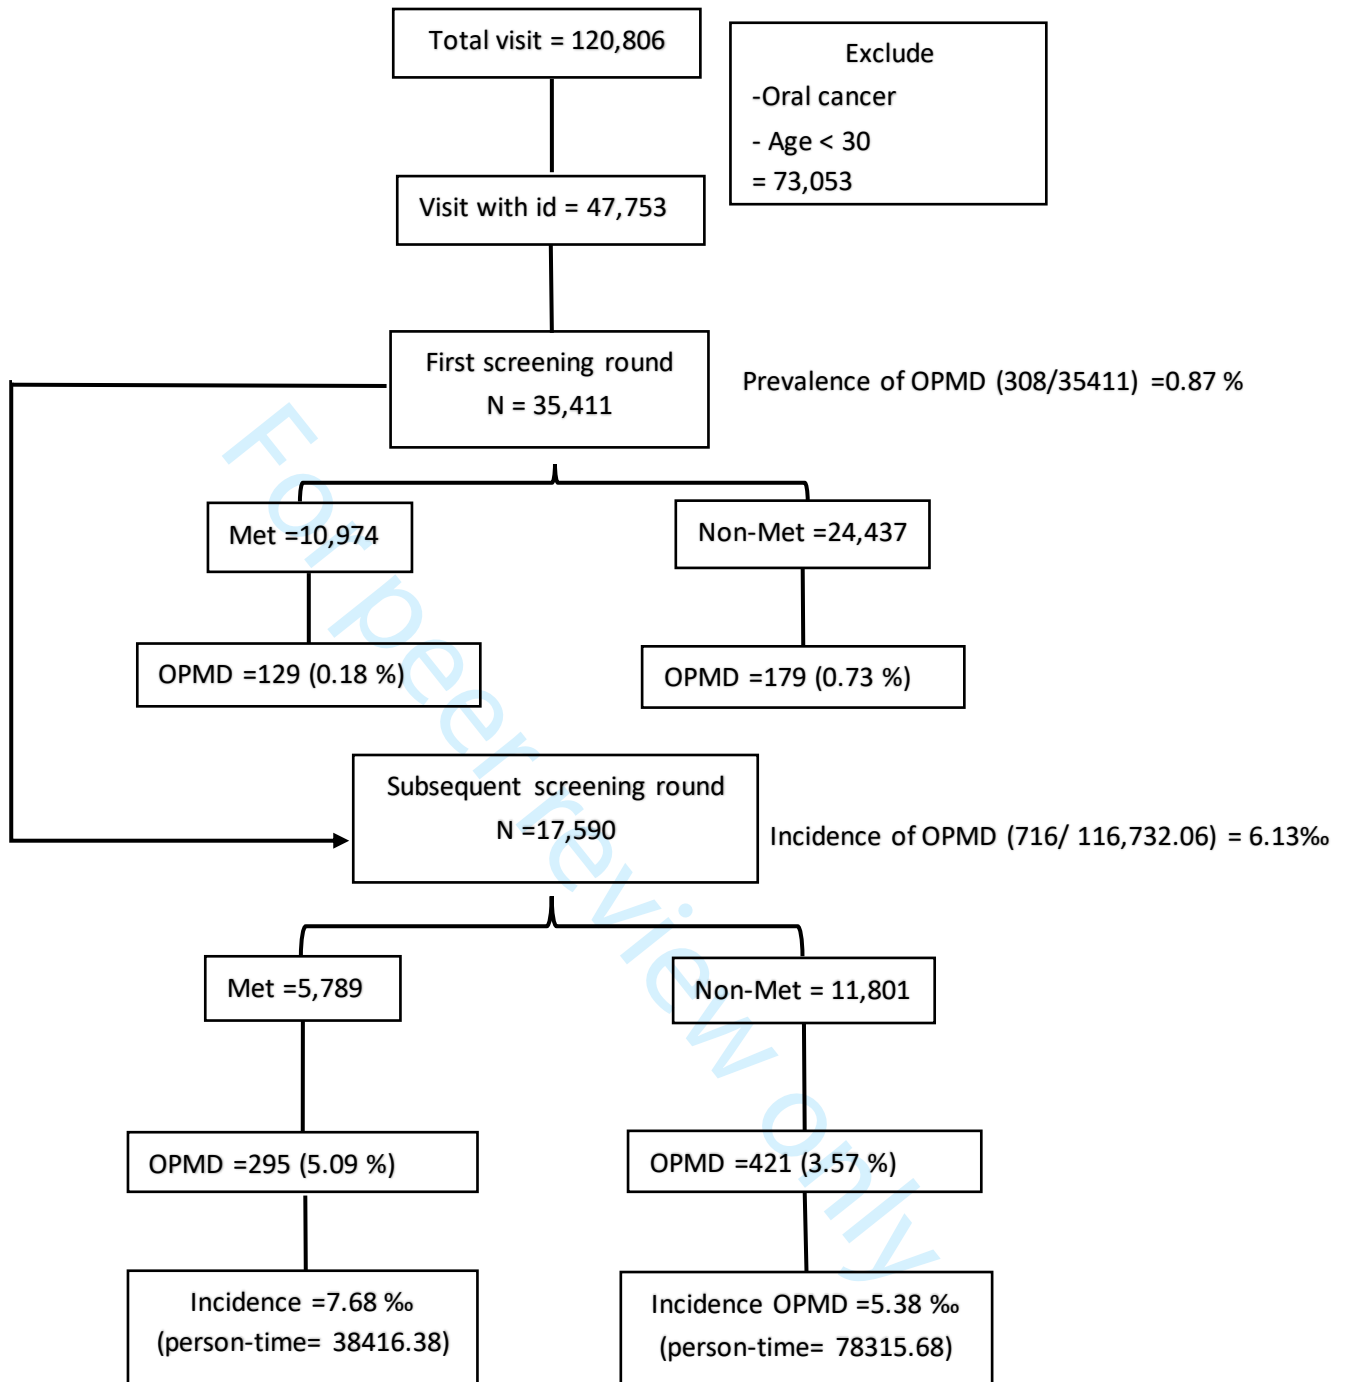

**Figure 1 The flow chart for prospective normal cohort study design**

**Supplement Table 1 The association between MetS, other factors and prevalence of oral potentially malignant disorders**

|                                                         | OR   | 95%CI | aOR   | 95%CI |      |      |
|---------------------------------------------------------|------|-------|-------|-------|------|------|
| <b>Metabolic syndrome</b>                               |      |       |       |       |      |      |
| Yen vs No                                               | 1.61 | 1.28  | 2.02  | 1.44  | 1.14 | 1.82 |
| <b>Sex</b>                                              |      |       |       |       |      |      |
| Male vs Female                                          | 7.32 | 4.65  | 11.53 | 2.50  | 1.50 | 4.16 |
| <b>Age groups (vs 70+)</b>                              |      |       |       |       |      |      |
| 30-39                                                   | 0.83 | 0.39  | 1.77  | 0.87  | 0.39 | 1.92 |
| 40-49                                                   | 1.69 | 1.02  | 2.77  | 1.33  | 0.79 | 2.25 |
| 50-59                                                   | 2.52 | 1.58  | 4.04  | 2.23  | 1.38 | 3.62 |
| 60-69                                                   | 1.83 | 1.11  | 3.01  | 1.73  | 1.04 | 2.86 |
| <b>Betel nut chewing (vs Never)</b>                     |      |       |       |       |      |      |
| Quit*                                                   | 3.33 | 2.53  | 4.37  | 1.40  | 1.04 | 1.90 |
| Current                                                 | 5.71 | 4.34  | 7.52  | 2.00  | 1.47 | 2.74 |
| <b>Cigarette smoking (vs Never)</b>                     |      |       |       |       |      |      |
| Quit*                                                   | 4.72 | 3.23  | 6.91  | 2.66  | 1.72 | 4.12 |
| Current                                                 | 8.89 | 6.48  | 12.19 | 4.74  | 3.25 | 6.92 |
| <b>Alcohol drinking (vs Never)</b>                      |      |       |       |       |      |      |
| Quit*                                                   | 2.49 | 1.95  | 3.16  | 0.98  | 0.59 | 1.63 |
| Current                                                 | 2.62 | 1.62  | 4.24  | 1.01  | 0.77 | 1.32 |
| <b>Meat (vs Seldom)</b>                                 |      |       |       |       |      |      |
| Infrequent                                              | 1.28 | 0.98  | 1.67  | 1.00  | 0.76 | 1.32 |
| Frequent                                                | 2.85 | 1.83  | 4.45  | 1.67  | 1.06 | 2.63 |
| <b>Vegetable (vs Seldom)</b>                            |      |       |       |       |      |      |
| Infrequent                                              | 0.82 | 0.63  | 1.07  | 0.88  | 0.68 | 1.16 |
| Frequent                                                | 0.48 | 0.15  | 1.52  | 0.53  | 0.17 | 1.71 |
| <b>Fruit (vs Seldom)</b>                                |      |       |       |       |      |      |
| Infrequent                                              | 0.71 | 0.49  | 1.02  | 1.00  | 0.68 | 1.46 |
| Frequent                                                | 0.54 | 0.38  | 0.78  | 1.02  | 0.69 | 1.50 |
| <b>Education level (vs Junior high school or lower)</b> |      |       |       |       |      |      |
| Senior high school                                      | 1.00 | 0.77  | 1.29  | 1.06  | 0.80 | 1.41 |
| University                                              | 0.54 | 0.36  | 0.82  | 0.84  | 0.55 | 1.30 |

**aOR:** adjusted odds ratio; **CI:** confidence interval; **\*Quit:** Quit betel quid chewing, quit smoking or quit alcohol drinking defined as who had ever have these oral habits; however no longer have these habits at the day of interview.

**Supplement Table 2 The association between Component of MetS, other factors and oral potentially malignant disorders (MetS → OPMD)**

|                                                         | RR   | 95% CI     | aRR  | 95% CI    |
|---------------------------------------------------------|------|------------|------|-----------|
| <b>Component of metabolic syndrome</b>                  |      |            |      |           |
| Central obesity                                         | 1.36 | 1.17 1.58  | 1.22 | 1.04 1.44 |
| Hyper-triglyceride                                      | 1.78 | 1.53 2.07  | 1.26 | 1.07 1.49 |
| Low HDL-C                                               | 1.26 | 1.08 1.47  | 1.12 | 0.95 1.32 |
| Elevated blood pressure                                 | 1.00 | 0.86 1.17  | 0.93 | 0.79 1.09 |
| Hyperglycemia                                           | 1.21 | 1.04 1.42  | 1.20 | 1.02 1.41 |
| <b>Sex</b>                                              |      |            |      |           |
| Male vs Female                                          | 7.14 | 3.94 12.94 | 3.57 | 1.94 6.59 |
| <b>Age groups (vs 70+)</b>                              |      |            |      |           |
| 30-39                                                   | 2.89 | 1.85 4.52  | 2.19 | 1.34 3.56 |
| 40-49                                                   | 3.53 | 2.43 5.12  | 2.65 | 1.78 3.94 |
| 50-59                                                   | 3.63 | 2.52 5.24  | 3.12 | 2.13 4.58 |
| 60-69                                                   | 2.85 | 1.95 4.16  | 2.56 | 1.73 3.79 |
| <b>Betel nut chewing (vs Never)</b>                     |      |            |      |           |
| Quit*                                                   | 3.03 | 2.54 3.63  | 1.94 | 1.57 2.40 |
| Current                                                 | 4.92 | 4.10 5.89  | 2.59 | 2.08 3.22 |
| <b>Cigarette smoking (vs Never)</b>                     |      |            |      |           |
| Quit*                                                   | 2.32 | 1.78 3.03  | 1.32 | 0.96 1.79 |
| Current                                                 | 4.90 | 3.94 6.09  | 2.42 | 1.86 3.14 |
| <b>Alcohol drinking (vs Never)</b>                      |      |            |      |           |
| Quit*                                                   | 2.18 | 1.62 2.92  | 1.24 | 0.90 1.70 |
| Current                                                 | 1.95 | 1.65 2.30  | 1.03 | 0.86 1.24 |
| <b>Meat (vs Seldom)</b>                                 |      |            |      |           |
| Infrequent                                              | 1.13 | 0.95 1.35  | 0.94 | 0.79 1.13 |
| Frequent                                                | 1.77 | 1.30 2.41  | 1.22 | 0.90 1.67 |
| <b>Vegetable (vs Seldom)</b>                            |      |            |      |           |
| Infrequent                                              | 0.83 | 0.70 0.99  | 0.93 | 0.78 1.12 |
| Frequent                                                | 0.36 | 0.15 0.87  | 0.48 | 0.20 1.14 |
| <b>Fruit (vs Seldom)</b>                                |      |            |      |           |
| Infrequent                                              | 0.74 | 0.59 0.93  | 0.91 | 0.72 1.15 |
| Frequent                                                | 0.51 | 0.40 0.64  | 0.77 | 0.60 0.98 |
| <b>Education level (vs Junior high school or lower)</b> |      |            |      |           |
| Senior high school                                      | 1.00 | 0.84 1.19  | 0.98 | 0.81 1.19 |
| University                                              | 0.60 | 0.45 0.81  | 0.84 | 0.62 1.14 |

**aRR:** adjusted rate ratio; **CI:** confidence interval; **\*Quit:** Quit betel quid chewing, quit smoking or quit alcohol drinking defined as who had ever have these oral habits; however no longer have these habits at the day of interview.

**Supplement Table 3 The association between MetS score, other factors and oral potentially malignant disorders (MetS → OPMD)**

|                                                         | RR   | 95%CI      | aRR  | 95%CI     |
|---------------------------------------------------------|------|------------|------|-----------|
| <b>Metabolic syndrome</b>                               |      |            |      |           |
| Score                                                   | 1.18 | 1.12 1.24  | 1.14 | 1.08 1.20 |
| <b>Sex</b>                                              |      |            |      |           |
| Male vs Female                                          | 7.14 | 3.94 12.94 | 3.51 | 1.90 6.47 |
| <b>Age groups (vs 70+)</b>                              |      |            |      |           |
| 30-39                                                   | 2.89 | 1.85 4.52  | 2.18 | 1.36 3.50 |
| 40-49                                                   | 3.53 | 2.43 5.12  | 2.64 | 1.80 3.87 |
| 50-59                                                   | 3.63 | 2.52 5.24  | 3.09 | 2.13 4.48 |
| 60-69                                                   | 2.85 | 1.95 4.16  | 2.53 | 1.73 3.70 |
| <b>Betel nut chewing (vs Never)</b>                     |      |            |      |           |
| Quit*                                                   | 3.03 | 2.54 3.63  | 1.98 | 1.61 2.44 |
| Current                                                 | 4.92 | 4.10 5.89  | 2.63 | 2.12 3.27 |
| <b>Cigarette smoking (vs Never)</b>                     |      |            |      |           |
| Quit*                                                   | 2.32 | 1.78 3.03  | 1.31 | 0.96 1.79 |
| Current                                                 | 4.90 | 3.94 6.09  | 2.48 | 1.91 3.22 |
| <b>Alcohol drinking (vs Never)</b>                      |      |            |      |           |
| Quit*                                                   | 2.18 | 1.62 2.92  | 1.23 | 0.90 1.68 |
| Current                                                 | 1.95 | 1.65 2.30  | 1.03 | 0.86 1.23 |
| <b>Meat (vs Seldom)</b>                                 |      |            |      |           |
| Infrequent                                              | 1.13 | 0.95 1.35  | 0.95 | 0.79 1.14 |
| Frequent                                                | 1.77 | 1.30 2.41  | 1.23 | 0.90 1.68 |
| <b>Vegetable (vs Seldom)</b>                            |      |            |      |           |
| Infrequent                                              | 0.83 | 0.70 0.99  | 0.92 | 0.77 1.10 |
| Frequent                                                | 0.36 | 0.15 0.87  | 0.46 | 0.19 1.11 |
| <b>Fruit (vs Seldom)</b>                                |      |            |      |           |
| Infrequent                                              | 0.74 | 0.59 0.93  | 0.92 | 0.73 1.15 |
| Frequent                                                | 0.51 | 0.40 0.64  | 0.79 | 0.62 1.01 |
| <b>Education level (vs Junior high school or lower)</b> |      |            |      |           |
| Senior high school                                      | 1.00 | 0.84 1.19  | 0.97 | 0.81 1.17 |
| University                                              | 0.60 | 0.45 0.81  | 0.84 | 0.62 1.14 |

**aRR:** adjusted rate ratio; **CI:** confidence interval; **\*Quit:** Quit betel quid chewing, quit smoking or quit alcohol drinking defined as who had ever have these oral habits; however no longer have these habits at the day of interview.

**Supplement Table 4 The association between MetS, other factors and oral submucous fibrosis (MetS → OSF)**

|                                                         | RR   | 95%CI      | aRR  | 95%CI      |
|---------------------------------------------------------|------|------------|------|------------|
| <b>Metabolic syndrome</b>                               |      |            |      |            |
| Yen vs No                                               | 1.35 | 0.96 1.90  | 1.22 | 0.87 1.71  |
| <b>Sex</b>                                              |      |            |      |            |
| Male vs Female                                          | 8.16 | 2.02 32.94 | 3.34 | 0.78 14.26 |
| <b>Age groups (vs 70+)</b>                              |      |            |      |            |
| 30-39                                                   | 2.88 | 1.23 6.73  | 2.61 | 1.04 6.54  |
| 40-49                                                   | 2.60 | 1.26 5.34  | 2.08 | 0.97 4.47  |
| 50-59                                                   | 2.22 | 1.08 4.56  | 1.99 | 0.96 4.13  |
| 60-69                                                   | 2.25 | 1.08 4.69  | 2.07 | 0.99 4.33  |
| <b>Betel nut chewing (vs Never)</b>                     |      |            |      |            |
| Quit*                                                   | 5.31 | 3.49 8.06  | 3.71 | 2.23 6.16  |
| Current                                                 | 7.82 | 5.07 12.05 | 4.77 | 2.87 7.92  |
| <b>Cigarette smoking (vs Never)</b>                     |      |            |      |            |
| Quit*                                                   | 3.58 | 2.03 6.34  | 1.60 | 0.77 3.32  |
| Current                                                 | 5.10 | 3.07 8.47  | 1.96 | 1.04 3.66  |
| <b>Alcohol drinking (vs Never)</b>                      |      |            |      |            |
| Quit*                                                   | 1.78 | 0.90 3.53  | 0.72 | 0.35 1.47  |
| Current                                                 | 1.80 | 1.25 2.59  | 0.83 | 0.56 1.23  |
| <b>Meat (vs Seldom)</b>                                 |      |            |      |            |
| Infrequent                                              | 1.03 | 0.69 1.52  | 0.84 | 0.56 1.24  |
| Frequent                                                | 2.65 | 1.47 4.77  | 1.71 | 0.94 3.11  |
| <b>Fruit (vs Seldom)</b>                                |      |            |      |            |
| Infrequent                                              | 0.92 | 0.54 1.56  | 1.11 | 0.65 1.91  |
| Frequent                                                | 0.55 | 0.32 0.95  | 0.87 | 0.50 1.51  |
| <b>Education level (vs Junior high school or lower)</b> |      |            |      |            |
| Senior high school                                      | 1.11 | 0.76 1.61  | 1.07 | 0.70 1.62  |
| University                                              | 0.23 | 0.08 0.62  | 0.33 | 0.12 0.94  |

**aRR:** adjusted rate ratio; **CI:** confidence interval \***Quit:** Quit betel quid chewing, quit smoking or quit alcohol drinking defined as who had ever have these oral habits; however no longer have these habits at the day of interview.



**Supplement Table 5 The association between Component of MetS, other factors and oral submucous fibrosis (MetS → OSF)**

|                                                         | RR   | 95%CI      | aRR  | 95%CI      |
|---------------------------------------------------------|------|------------|------|------------|
| <b>Component of metabolic syndrome</b>                  |      |            |      |            |
| Central obesity                                         | 1.21 | 0.87 1.70  | 1.06 | 0.74 1.52  |
| Hyper-triglyceride                                      | 1.67 | 1.19 2.34  | 1.21 | 0.83 1.76  |
| Low HDL-C                                               | 1.06 | 0.74 1.50  | 0.94 | 0.64 1.38  |
| Elevated blood pressure                                 | 1.04 | 0.74 1.47  | 0.95 | 0.66 1.37  |
| Hyperglycemia                                           | 1.37 | 0.97 1.92  | 1.43 | 0.99 2.05  |
| <b>Sex</b>                                              |      |            |      |            |
| Male vs Female                                          | 8.16 | 2.02 32.94 | 3.27 | 0.77 13.93 |
| <b>Age groups (vs 70+)</b>                              |      |            |      |            |
| 30-39                                                   | 2.88 | 1.23 6.73  | 2.60 | 1.02 6.63  |
| 40-49                                                   | 2.60 | 1.26 5.34  | 2.05 | 0.95 4.43  |
| 50-59                                                   | 2.22 | 1.08 4.56  | 1.89 | 0.91 3.91  |
| 60-69                                                   | 2.25 | 1.08 4.69  | 2.03 | 0.97 4.26  |
| <b>Betel nut chewing (vs Never)</b>                     |      |            |      |            |
| Quit*                                                   | 5.31 | 3.49 8.06  | 3.77 | 2.26 6.31  |
| Current                                                 | 7.82 | 5.07 12.05 | 4.88 | 2.92 8.14  |
| <b>Cigarette smoking (vs Never)</b>                     |      |            |      |            |
| Quit*                                                   | 3.58 | 2.03 6.34  | 1.59 | 0.77 3.29  |
| Current                                                 | 5.10 | 3.07 8.47  | 1.91 | 1.02 3.59  |
| <b>Alcohol drinking (vs Never)</b>                      |      |            |      |            |
| Quit*                                                   | 1.78 | 0.90 3.53  | 0.73 | 0.36 1.50  |
| Current                                                 | 1.80 | 1.25 2.59  | 0.84 | 0.56 1.25  |
| <b>Meat (vs Seldom)</b>                                 |      |            |      |            |
| Infrequent                                              | 1.03 | 0.69 1.52  | 0.82 | 0.55 1.21  |
| Frequent                                                | 2.65 | 1.47 4.77  | 1.67 | 0.91 3.09  |
| <b>Fruit (vs Seldom)</b>                                |      |            |      |            |
| Infrequent                                              | 0.92 | 0.54 1.56  | 1.12 | 0.65 1.92  |
| Frequent                                                | 0.55 | 0.32 0.95  | 0.85 | 0.49 1.48  |
| <b>Education level (vs Junior high school or lower)</b> |      |            |      |            |
| Senior high school                                      | 1.11 | 0.76 1.61  | 1.09 | 0.71 1.66  |
| University                                              | 0.23 | 0.08 0.62  | 0.34 | 0.12 0.95  |

**aRR:** adjusted rate ratio; **CI:** confidence interval; **\*Quit:** Quit betel quid chewing, quit smoking or quit alcohol drinking defined as who had ever have these oral habits; however no longer have these habits at the day of interview.

**Supplement Table 6 The association between MetS score, other factors and oral submucous fibrosis (MetS → OSF)**

|                                                         | <b>RR</b> | <b>95%CI</b> |       | <b>aRR</b> | <b>95%CI</b> |       |
|---------------------------------------------------------|-----------|--------------|-------|------------|--------------|-------|
| <b>Metabolic syndrome</b>                               |           |              |       |            |              |       |
| Score                                                   | 1.15      | 1.03         | 1.30  | 1.10       | 0.98         | 1.24  |
| <b>Sex</b>                                              |           |              |       |            |              |       |
| Male vs Female                                          | 8.16      | 2.02         | 32.94 | 3.37       | 0.79         | 14.38 |
| <b>Age groups (vs 70+)</b>                              |           |              |       |            |              |       |
| 30-39                                                   | 2.88      | 1.23         | 6.73  | 2.63       | 1.05         | 6.62  |
| 40-49                                                   | 2.60      | 1.26         | 5.34  | 2.10       | 0.98         | 4.50  |
| 50-59                                                   | 2.22      | 1.08         | 4.56  | 1.99       | 0.96         | 4.12  |
| 60-69                                                   | 2.25      | 1.08         | 4.69  | 2.07       | 0.99         | 4.33  |
| <b>Betel nut chewing (vs Never)</b>                     |           |              |       |            |              |       |
| Quit*                                                   | 5.31      | 3.49         | 8.06  | 3.68       | 2.21         | 6.11  |
| Current                                                 | 7.82      | 5.07         | 12.05 | 4.70       | 2.83         | 7.80  |
| <b>Cigarette smoking (vs Never)</b>                     |           |              |       |            |              |       |
| Quit*                                                   | 3.58      | 2.03         | 6.34  | 1.60       | 0.77         | 3.33  |
| Current                                                 | 5.10      | 3.07         | 8.47  | 1.96       | 1.05         | 3.67  |
| <b>Alcohol drinking (vs Never)</b>                      |           |              |       |            |              |       |
| Quit*                                                   | 1.78      | 0.90         | 3.53  | 0.72       | 0.35         | 1.47  |
| Current                                                 | 1.80      | 1.25         | 2.59  | 0.83       | 0.56         | 1.23  |
| <b>Meat (vs Seldom)</b>                                 |           |              |       |            |              |       |
| Infrequent                                              | 1.03      | 0.69         | 1.52  | 0.84       | 0.57         | 1.24  |
| Frequent                                                | 2.65      | 1.47         | 4.77  | 1.71       | 0.94         | 3.11  |
| <b>Fruit (vs Seldom)</b>                                |           |              |       |            |              |       |
| Infrequent                                              | 0.92      | 0.54         | 1.56  | 1.12       | 0.65         | 1.92  |
| Frequent                                                | 0.55      | 0.32         | 0.95  | 0.87       | 0.50         | 1.51  |
| <b>Education level (vs Junior high school or lower)</b> |           |              |       |            |              |       |
| Senior high school                                      | 1.11      | 0.76         | 1.61  | 1.07       | 0.70         | 1.63  |
| University                                              | 0.23      | 0.08         | 0.62  | 0.33       | 0.12         | 0.94  |

**aRR:** adjusted rate ratio; **CI:** confidence interval; **\*Quit:** Quit betel quid chewing, quit smoking or quit alcohol drinking defined as who had ever have these oral habits; however no longer have these habits at the day of interview.

**Supplement Table 7 The association between MetS, other factors and Leukoplakia  
(MetS → Leukoplakia)**

|                                                         | RR   | 95%CI      | aRR  | 95%CI     |
|---------------------------------------------------------|------|------------|------|-----------|
| <b>Metabolic syndrome</b>                               |      |            |      |           |
| Yen vs No                                               | 1.45 | 1.22 1.73  | 1.37 | 1.14 1.64 |
| <b>Sex</b>                                              |      |            |      |           |
| Male vs Female                                          | 6.48 | 3.36 12.52 | 3.29 | 1.67 6.48 |
| <b>Age groups (vs 70+)</b>                              |      |            |      |           |
| 30-39                                                   | 2.92 | 1.63 5.22  | 2.08 | 1.13 3.81 |
| 40-49                                                   | 4.38 | 2.72 7.05  | 3.20 | 1.97 5.18 |
| 50-59                                                   | 4.86 | 3.04 7.78  | 4.09 | 2.55 6.57 |
| 60-69                                                   | 3.51 | 2.16 5.71  | 3.13 | 1.92 5.09 |
| <b>Betel nut chewing (vs Never)</b>                     |      |            |      |           |
| Quit*                                                   | 2.70 | 2.20 3.33  | 1.81 | 1.42 2.30 |
| Current                                                 | 4.45 | 3.61 5.49  | 2.42 | 1.88 3.12 |
| <b>Cigarette smoking (vs Never)</b>                     |      |            |      |           |
| Quit*                                                   | 2.04 | 1.49 2.80  | 1.22 | 0.86 1.74 |
| Current                                                 | 4.88 | 3.80 6.27  | 2.66 | 1.98 3.58 |
| <b>Alcohol drinking (vs Never)</b>                      |      |            |      |           |
| Quit*                                                   | 2.29 | 1.63 3.20  | 1.36 | 0.95 1.96 |
| Current                                                 | 1.95 | 1.61 2.36  | 1.06 | 0.86 1.31 |
| <b>Meat (vs Seldom)</b>                                 |      |            |      |           |
| Infrequent                                              | 1.12 | 0.91 1.37  | 0.93 | 0.76 1.15 |
| Frequent                                                | 1.47 | 1.00 2.16  | 1.01 | 0.68 1.51 |
| <b>Vegetable (vs Seldom)</b>                            |      |            |      |           |
| Infrequent                                              | 0.84 | 0.69 1.03  | 0.93 | 0.75 1.14 |
| Frequent                                                | 0.49 | 0.20 1.19  | 0.60 | 0.25 1.45 |
| <b>Fruit (vs Seldom)</b>                                |      |            |      |           |
| Infrequent                                              | 0.68 | 0.53 0.89  | 0.85 | 0.65 1.11 |
| Frequent                                                | 0.51 | 0.39 0.66  | 0.78 | 0.59 1.03 |
| <b>Education level (vs Junior high school or lower)</b> |      |            |      |           |
| Senior high school                                      | 0.99 | 0.80 1.22  | 0.98 | 0.78 1.22 |
| University                                              | 0.74 | 0.55 1.01  | 1.03 | 0.74 1.43 |

**aRR:** adjusted rate ratio; **CI:** confidence interval; **\*Quit:** Quit betel quid chewing, quit smoking or quit alcohol drinking defined as who had ever have these oral habits; however no longer have these habits at the day of interview.

**Supplement Table 8 The association between Component of MetS, other factors and Leukoplakia (MetS → Leukoplakia)**

|                                                         | RR   | 95%CI      | aRR  | 95%CI     |
|---------------------------------------------------------|------|------------|------|-----------|
| <b>Component of metabolic syndrome</b>                  |      |            |      |           |
| Central obesity                                         | 1.43 | 1.20 1.70  | 1.30 | 1.07 1.57 |
| Hyper-triglyceride                                      | 1.85 | 1.56 2.21  | 1.29 | 1.06 1.57 |
| Low HDL-C                                               | 1.34 | 1.12 1.60  | 1.17 | 0.97 1.42 |
| Elevated blood pressure                                 | 0.99 | 0.83 1.18  | 0.90 | 0.75 1.09 |
| Hyperglycemia                                           | 1.20 | 1.00 1.44  | 1.16 | 0.96 1.41 |
| <b>Sex</b>                                              |      |            |      |           |
| Male vs Female                                          | 6.48 | 3.36 12.52 | 3.43 | 1.74 6.75 |
| <b>Age groups (vs 70+)</b>                              |      |            |      |           |
| 30-39                                                   | 2.92 | 1.63 5.22  | 2.15 | 1.14 4.06 |
| 40-49                                                   | 4.38 | 2.72 7.05  | 3.34 | 2.00 5.57 |
| 50-59                                                   | 4.86 | 3.04 7.78  | 4.30 | 2.61 7.08 |
| 60-69                                                   | 3.51 | 2.16 5.71  | 3.29 | 1.97 5.49 |
| <b>Betel nut chewing (vs Never)</b>                     |      |            |      |           |
| Quit*                                                   | 2.70 | 2.20 3.33  | 1.73 | 1.36 2.20 |
| Current                                                 | 4.45 | 3.61 5.49  | 2.31 | 1.79 2.98 |
| <b>Cigarette smoking (vs Never)</b>                     |      |            |      |           |
| Quit*                                                   | 2.04 | 1.49 2.80  | 1.23 | 0.86 1.75 |
| Current                                                 | 4.88 | 3.80 6.27  | 2.60 | 1.93 3.50 |
| <b>Alcohol drinking (vs Never)</b>                      |      |            |      |           |
| Quit*                                                   | 2.29 | 1.63 3.20  | 1.37 | 0.95 1.98 |
| Current                                                 | 1.95 | 1.61 2.36  | 1.06 | 0.86 1.32 |
| <b>Meat (vs Seldom)</b>                                 |      |            |      |           |
| Infrequent                                              | 1.12 | 0.91 1.37  | 0.94 | 0.76 1.16 |
| Frequent                                                | 1.47 | 1.00 2.16  | 1.02 | 0.68 1.51 |
| <b>Vegetable (vs Seldom)</b>                            |      |            |      |           |
| Infrequent                                              | 0.84 | 0.69 1.03  | 0.92 | 0.75 1.14 |
| Frequent                                                | 0.49 | 0.20 1.19  | 0.60 | 0.25 1.45 |
| <b>Fruit (vs Seldom)</b>                                |      |            |      |           |
| Infrequent                                              | 0.68 | 0.53 0.89  | 0.85 | 0.65 1.11 |
| Frequent                                                | 0.51 | 0.39 0.66  | 0.78 | 0.59 1.03 |
| <b>Education level (vs Junior high school or lower)</b> |      |            |      |           |
| Senior high school                                      | 0.99 | 0.80 1.22  | 0.98 | 0.78 1.22 |
| University                                              | 0.74 | 0.55 1.01  | 1.04 | 0.75 1.44 |

**aRR:** adjusted rate ratio; **CI:** confidence interval; **\*Quit:** Quit betel quid chewing, quit smoking or quit alcohol drinking defined as who had ever have these oral habits; however no longer have these habits at the day of interview.

**Supplement Table 9 The association between MetS score, other factors and Leukoplakia (MetS → Leukoplakia )**

|                                                         | RR   | 95%CI      | aRR  | 95%CI     |
|---------------------------------------------------------|------|------------|------|-----------|
| <b>Metabolic syndrome</b>                               |      |            |      |           |
| Score                                                   | 1.20 | 1.13 1.27  | 1.16 | 1.09 1.24 |
| <b>Sex</b>                                              |      |            |      |           |
| Male vs Female                                          | 6.48 | 3.36 12.52 | 3.31 | 1.68 6.51 |
| <b>Age groups (vs 70+)</b>                              |      |            |      |           |
| 30-39                                                   | 2.92 | 1.63 5.22  | 2.09 | 1.14 3.84 |
| 40-49                                                   | 4.38 | 2.72 7.05  | 3.22 | 1.99 5.22 |
| 50-59                                                   | 4.86 | 3.04 7.78  | 4.08 | 2.54 6.54 |
| 60-69                                                   | 3.51 | 2.16 5.71  | 3.12 | 1.92 5.08 |
| <b>Betel nut chewing (vs Never)</b>                     |      |            |      |           |
| Quit*                                                   | 2.70 | 2.20 3.33  | 1.79 | 1.40 2.27 |
| Current                                                 | 4.45 | 3.61 5.49  | 2.37 | 1.84 3.05 |
| <b>Cigarette smoking (vs Never)</b>                     |      |            |      |           |
| Quit*                                                   | 2.04 | 1.49 2.80  | 1.22 | 0.86 1.74 |
| Current                                                 | 4.88 | 3.80 6.27  | 2.68 | 1.99 3.60 |
| <b>Alcohol drinking (vs Never)</b>                      |      |            |      |           |
| Quit*                                                   | 2.29 | 1.63 3.20  | 1.37 | 0.95 1.97 |
| Current                                                 | 1.95 | 1.61 2.36  | 1.05 | 0.85 1.30 |
| <b>Meat (vs Seldom)</b>                                 |      |            |      |           |
| Infrequent                                              | 1.12 | 0.91 1.37  | 0.94 | 0.76 1.16 |
| Frequent                                                | 1.47 | 1.00 2.16  | 1.02 | 0.68 1.51 |
| <b>Vegetable (vs Seldom)</b>                            |      |            |      |           |
| Infrequent                                              | 0.84 | 0.69 1.03  | 0.92 | 0.75 1.14 |
| Frequent                                                | 0.49 | 0.20 1.19  | 0.60 | 0.25 1.45 |
| <b>Fruit (vs Seldom)</b>                                |      |            |      |           |
| Infrequent                                              | 0.68 | 0.53 0.89  | 0.85 | 0.65 1.11 |
| Frequent                                                | 0.51 | 0.39 0.66  | 0.78 | 0.59 1.03 |
| <b>Education level (vs Junior high school or lower)</b> |      |            |      |           |
| Senior high school                                      | 0.99 | 0.80 1.22  | 0.98 | 0.78 1.22 |
| University                                              | 0.74 | 0.55 1.01  | 1.04 | 0.75 1.44 |

**aRR:** adjusted rate ratio; **CI:** confidence interval; **\*Quit:** Quit betel quid chewing, quit smoking or quit alcohol drinking defined as who had ever have these oral habits; however no longer have these habits at the day of interview.

**Supplement Table 10 The association between MetS, other factors and Verrucous hyperplasia (MetS → Verrucous hyperplasia)**

|                                     | <b>RR</b> | <b>95%CI</b> | <b>aRR</b> | <b>95%CI</b> |
|-------------------------------------|-----------|--------------|------------|--------------|
| <b>Metabolic syndrome</b>           |           |              |            |              |
| Yen vs No                           | 1.32      | 0.51 3.40    | 1.33       | 0.51 3.46    |
| <b>Betel nut chewing (vs Never)</b> |           |              |            |              |
| Quit*                               | 1.92      | 0.64 5.71    | 1.24       | 0.40 3.82    |
| Current                             | 2.71      | 0.84 8.81    | 1.13       | 0.34 3.74    |
| <b>Cigarette smoking (vs Never)</b> |           |              |            |              |
| Quit*                               | 1.91      | 0.12 30.49   | 1.72       | 0.09 31.37   |
| Current                             | 17.03     | 2.26 128.38  | 15.80      | 2.04 122.28  |

**aRR:** adjusted rate ratio; **CI:** confidence interval; **\*Quit:** Quit betel quid chewing or quit smoking drinking defined as who had ever have these oral habits; however no longer have these habits at the day of interview.

**Supplement Table 11 The association between Component of MetS, other factors and Verrucous hyperplasia (MetS → Verrucous hyperplasia)**

|                                        | RR    | 95%CI       | aRR   | 95%CI       |
|----------------------------------------|-------|-------------|-------|-------------|
| <b>Component of metabolic syndrome</b> |       |             |       |             |
| Central obesity                        | 1.05  | 0.41 2.71   | 1.17  | 0.47 2.89   |
| Hyper-triglyceride                     | 1.26  | 0.47 3.42   | 0.98  | 0.40 2.40   |
| Low HDL-C                              | 0.88  | 0.31 2.50   | 0.79  | 0.31 1.99   |
| Elevated blood pressure                | 1.04  | 0.40 2.69   | 1.34  | 0.46 3.85   |
| Hyperglycemia                          | 1.13  | 0.42 3.05   | 1.28  | 0.52 3.19   |
| <b>Betel nut chewing (vs Never)</b>    |       |             |       |             |
| Quit*                                  | 1.92  | 0.64 5.71   | 1.22  | 0.39 3.80   |
| Current                                | 2.71  | 0.84 8.81   | 0.84  | 0.23 3.13   |
| <b>Cigarette smoking (vs Never)</b>    |       |             |       |             |
| Quit*                                  | 1.91  | 0.12 30.49  | 1.72  | 0.09 31.29  |
| Current                                | 17.03 | 2.26 128.38 | 16.34 | 2.00 133.78 |

**aRR:** adjusted rate ratio; **CI:** confidence interval; **\*Quit:** Quit betel quid chewing or quit smoking defined as who had ever have these oral habits; however no longer have these habits at the day of interview.

**Supplement Table 12 The association between MetS score, other factors and Verrucous hyperplasia (MetS → Verrucous hyperplasia)**

|                                     | <b>RR</b> | <b>95%CI</b> | <b>aRR</b> | <b>95%CI</b> |
|-------------------------------------|-----------|--------------|------------|--------------|
| <b>Metabolic syndrome</b>           |           |              |            |              |
| Score                               | 1.01      | 0.67 1.54    | 1.02       | 0.68 1.54    |
| <b>Betel nut chewing (vs Never)</b> |           |              |            |              |
| Quit*                               | 1.92      | 0.64 5.71    | 1.24       | 0.40 3.85    |
| Current                             | 2.71      | 0.84 8.81    | 1.15       | 0.34 3.91    |
| <b>Cigarette smoking (vs Never)</b> |           |              |            |              |
| Quit*                               | 1.91      | 0.12 30.49   | 1.73       | 0.09 31.58   |
| Current                             | 17.03     | 2.26 128.38  | 15.73      | 2.01 122.98  |

**aRR:** adjusted rate ratio; **CI:** confidence interval; **\*Quit:** Quit betel quid chewing or quit smoking defined as who had ever have these oral habits; however no longer have these habits at the day of interview.



**Supplement Table 13 The association between MetS, other factors and Erythroplakia + Erythroleukoplakia (MetS → Erythroplakia + Erythroleukoplakia)**

|                                     | <b>RR</b> | <b>95%CI</b> | <b>aRR</b> | <b>95%CI</b> |
|-------------------------------------|-----------|--------------|------------|--------------|
| <b>Metabolic syndrome</b>           |           |              |            |              |
| Yen vs No                           | 1.88      | 0.80 4.43    | 1.59       | 0.67 3.75    |
| <b>Betel nut chewing (vs Never)</b> |           |              |            |              |
| Quit*                               | 4.31      | 1.16 16.03   | 4.47       | 0.93 21.46   |
| Current                             | 18.24     | 5.88 56.54   | 17.81      | 4.95 64.12   |
| <b>Cigarette smoking (vs Never)</b> |           |              |            |              |
| Quit*                               | 1.91      | 0.48 7.62    | 0.84       | 0.15 4.60    |
| Current                             | 3.46      | 1.13 10.61   | 0.96       | 0.26 3.49    |

**aRR:** adjusted rate ratio; **CI:** confidence interval; **\*Quit:** Quit betel quid chewing or quit smoking defined as who had ever have these oral habits; however no longer have these habits at the day of interview.

**Supplement Table 14 The association between Component of MetS, other factors and Erythroplakia + Erythroleukoplakia (MetS → Erythroplakia + Erythroleukoplakia)**

|                                        | RR    | 95%CI      | aRR   | 95%CI      |
|----------------------------------------|-------|------------|-------|------------|
| <b>Component of metabolic syndrome</b> |       |            |       |            |
| Central obesity                        | 1.24  | 0.52 2.94  | 0.94  | 0.37 2.36  |
| Hyper-triglyceride                     | 2.10  | 0.89 4.95  | 1.39  | 0.54 3.58  |
| Low HDL-C                              | 1.30  | 0.54 3.13  | 1.18  | 0.47 2.97  |
| Elevated blood pressure                | 1.33  | 0.54 3.29  | 1.22  | 0.50 3.00  |
| Hyperglycemia                          | 1.03  | 0.42 2.56  | 0.99  | 0.37 2.64  |
| <b>Betel nut chewing (vs Never)</b>    |       |            |       |            |
| Quit*                                  | 4.31  | 1.16 16.03 | 4.49  | 0.94 21.55 |
| Current                                | 18.24 | 5.88 56.54 | 17.86 | 5.10 62.54 |
| <b>Cigarette smoking (vs Never)</b>    |       |            |       |            |
| Quit*                                  | 1.91  | 0.48 7.62  | 0.85  | 0.15 4.65  |
| Current                                | 3.46  | 1.13 10.61 | 0.91  | 0.24 3.50  |

**aRR:** adjusted rate ratio; **CI:** confidence interval; **\*Quit:** Quit betel quid chewing or quit smoking defined as who had ever have these oral habits; however no longer have these habits at the day of interview.

**Supplement Table 15 The association between MetS score, other factors and Erythroplakia + Erythroleukoplakia (MetS → Erythroplakia + Erythroleukoplakia)**

|                                     | <b>RR</b> | <b>95%CI</b> | <b>aRR</b> | <b>95%CI</b> |
|-------------------------------------|-----------|--------------|------------|--------------|
| <b>Metabolic syndrome</b>           |           |              |            |              |
| Score                               | 1.22      | 0.89 1.68    | 1.13       | 0.83 1.55    |
| <b>Betel nut chewing (vs Never)</b> |           |              |            |              |
| Quit*                               | 4.31      | 1.16 16.03   | 4.49       | 0.94 21.54   |
| Current                             | 18.24     | 5.88 56.54   | 17.92      | 4.96 64.68   |
| <b>Cigarette smoking (vs Never)</b> |           |              |            |              |
| Quit*                               | 1.91      | 0.48 7.62    | 0.84       | 0.15 4.60    |
| Current                             | 3.46      | 1.13 10.61   | 0.95       | 0.26 3.49    |

**aRR:** adjusted rate ratio; **CI:** confidence interval; **\*Quit:** Quit betel quid chewing or quit smoking defined as who had ever have these oral habits; however no longer have these habits at the day of interview.

STROBE Statement—Checklist of items that should be included in reports of *cohort studies*

|                              | Item No | Recommendation                                                                                                                                                                                    | Pages          |
|------------------------------|---------|---------------------------------------------------------------------------------------------------------------------------------------------------------------------------------------------------|----------------|
| <b>Title and abstract</b>    | 1       | (a) Indicate the study's design with a commonly used term in the title or the abstract                                                                                                            | 1              |
|                              |         | (b) Provide in the abstract an informative and balanced summary of what was done and what was found                                                                                               | 2              |
| <b>Introduction</b>          |         |                                                                                                                                                                                                   |                |
| Background/rationale         | 2       | Explain the scientific background and rationale for the investigation being reported                                                                                                              | 5              |
| Objectives                   | 3       | State specific objectives, including any prespecified hypotheses                                                                                                                                  | 5,6            |
| <b>Methods</b>               |         |                                                                                                                                                                                                   |                |
| Study design                 | 4       | Present key elements of study design early in the paper                                                                                                                                           | 7              |
| Setting                      | 5       | Describe the setting, locations, and relevant dates, including periods of recruitment, exposure, follow-up, and data collection                                                                   | 7,8            |
| Participants                 | 6       | (a) Give the eligibility criteria, and the sources and methods of selection of participants. Describe methods of follow-up                                                                        | 7,8            |
|                              |         | (b) For matched studies, give matching criteria and number of exposed and unexposed                                                                                                               | NA             |
| Variables                    | 7       | Clearly define all outcomes, exposures, predictors, potential confounders, and effect modifiers. Give diagnostic criteria, if applicable                                                          | 7              |
| Data sources/<br>measurement | 8*      | For each variable of interest, give sources of data and details of methods of assessment (measurement). Describe comparability of assessment methods if there is more than one group              | 7,8            |
| Bias                         | 9       | Describe any efforts to address potential sources of bias                                                                                                                                         | NA             |
| Study size                   | 10      | Explain how the study size was arrived at                                                                                                                                                         | 7              |
| Quantitative variables       | 11      | Explain how quantitative variables were handled in the analyses. If applicable, describe which groupings were chosen and why                                                                      | 8,10           |
| Statistical methods          | 12      | (a) Describe all statistical methods, including those used to control for confounding                                                                                                             | 10             |
|                              |         | (b) Describe any methods used to examine subgroups and interactions                                                                                                                               | NA             |
|                              |         | (c) Explain how missing data were addressed                                                                                                                                                       | NA             |
|                              |         | (d) If applicable, explain how loss to follow-up was addressed                                                                                                                                    | NA             |
|                              |         | (e) Describe any sensitivity analyses                                                                                                                                                             | NA             |
| <b>Results</b>               |         |                                                                                                                                                                                                   |                |
| Participants                 | 13*     | (a) Report numbers of individuals at each stage of study—eg numbers potentially eligible, examined for eligibility, confirmed eligible, included in the study, completing follow-up, and analysed | 11             |
|                              |         | (b) Give reasons for non-participation at each stage                                                                                                                                              | NA             |
|                              |         | (c) Consider use of a flow diagram                                                                                                                                                                | 11<br>(Figure) |
| Descriptive data             | 14*     | (a) Give characteristics of study participants (eg demographic, clinical, social) and information on exposures and potential confounders                                                          | 11             |
|                              |         | (b) Indicate number of participants with missing data for each variable of interest                                                                                                               | NA             |
|                              |         | (c) Summarise follow-up time (eg, average and total amount)                                                                                                                                       | NA             |
| Outcome data                 | 15*     | Report numbers of outcome events or summary measures over time                                                                                                                                    | 11             |
| Main results                 | 16      | (a) Give unadjusted estimates and, if applicable, confounder-adjusted                                                                                                                             | 11,12          |

|                          |    |                                                                                                                                                                            |    |
|--------------------------|----|----------------------------------------------------------------------------------------------------------------------------------------------------------------------------|----|
|                          |    | estimates and their precision (eg, 95% confidence interval). Make clear which confounders were adjusted for and why they were included                                     |    |
|                          |    | (b) Report category boundaries when continuous variables were categorized                                                                                                  | NA |
|                          |    | (c) If relevant, consider translating estimates of relative risk into absolute risk for a meaningful time period                                                           | NA |
| Other analyses           | 17 | Report other analyses done—eg analyses of subgroups and interactions, and sensitivity analyses                                                                             | NA |
| <b>Discussion</b>        |    |                                                                                                                                                                            |    |
| Key results              | 18 | Summarise key results with reference to study objectives                                                                                                                   | 13 |
| Limitations              | 19 | Discuss limitations of the study, taking into account sources of potential bias or imprecision. Discuss both direction and magnitude of any potential bias                 | 17 |
| Interpretation           | 20 | Give a cautious overall interpretation of results considering objectives, limitations, multiplicity of analyses, results from similar studies, and other relevant evidence | 17 |
| Generalisability         | 21 | Discuss the generalisability (external validity) of the study results                                                                                                      | 17 |
| <b>Other information</b> |    |                                                                                                                                                                            |    |
| Funding                  | 22 | Give the source of funding and the role of the funders for the present study and, if applicable, for the original study on which the present article is based              | 19 |

\*Give information separately for exposed and unexposed groups.

**Note:** An Explanation and Elaboration article discusses each checklist item and gives methodological background and published examples of transparent reporting. The STROBE checklist is best used in conjunction with this article (freely available on the Web sites of PLoS Medicine at <http://www.plosmedicine.org/>, Annals of Internal Medicine at <http://www.annals.org/>, and Epidemiology at <http://www.epidem.com/>). Information on the STROBE Initiative is available at <http://www.strobe-statement.org>.

# BMJ Open

## The Effect of Metabolic Syndrome on Incidence of Oral Potentially Malignant Disorder: A Prospective Cohort Study in Taiwan

|                                 |                                                                                                                                                                                                                                                                                                                                                                                                                                                                                                                                                                                                                                                                                                              |
|---------------------------------|--------------------------------------------------------------------------------------------------------------------------------------------------------------------------------------------------------------------------------------------------------------------------------------------------------------------------------------------------------------------------------------------------------------------------------------------------------------------------------------------------------------------------------------------------------------------------------------------------------------------------------------------------------------------------------------------------------------|
| Journal:                        | <i>BMJ Open</i>                                                                                                                                                                                                                                                                                                                                                                                                                                                                                                                                                                                                                                                                                              |
| Manuscript ID                   | bmjopen-2020-041971.R2                                                                                                                                                                                                                                                                                                                                                                                                                                                                                                                                                                                                                                                                                       |
| Article Type:                   | Original research                                                                                                                                                                                                                                                                                                                                                                                                                                                                                                                                                                                                                                                                                            |
| Date Submitted by the Author:   | 17-Sep-2020                                                                                                                                                                                                                                                                                                                                                                                                                                                                                                                                                                                                                                                                                                  |
| Complete List of Authors:       | Siewchaisakul, Pallop; Taipei Medical University College of Oral Medicine, School of dentistry<br>Wang, Sen-Te ; Taipei Medical University Hospital<br>Peng, Szu-Min ; National Taiwan University, Institute of Epidemiology and Preventive Medicine, College of Public Health,<br>Sarakarn, Pongdech; Khon Kaen University, Epidemiology and Biostatistics Department, Faculty of Public Health<br>Chen, Li-Sheng; Taipei Medical University College of Oral Medicine, School of Oral Hygiene<br>Chen, Tony Hsiu-Hsi; National Taiwan University, Division of Biostatistics<br>Yeh, Yen-Po; Changhua County Public Health Bureau<br>Yen, Amy Ming-Fang; Taipei Medical University College of Oral Medicine, |
| <b>Primary Subject Heading</b>: | Epidemiology                                                                                                                                                                                                                                                                                                                                                                                                                                                                                                                                                                                                                                                                                                 |
| Secondary Subject Heading:      | Nutrition and metabolism, Oncology, Public health                                                                                                                                                                                                                                                                                                                                                                                                                                                                                                                                                                                                                                                            |
| Keywords:                       | ORAL MEDICINE, ONCOLOGY, Epidemiology < ONCOLOGY                                                                                                                                                                                                                                                                                                                                                                                                                                                                                                                                                                                                                                                             |
|                                 |                                                                                                                                                                                                                                                                                                                                                                                                                                                                                                                                                                                                                                                                                                              |

SCHOLARONE™  
Manuscripts



I, the Submitting Author has the right to grant and does grant on behalf of all authors of the Work (as defined in the below author licence), an exclusive licence and/or a non-exclusive licence for contributions from authors who are: i) UK Crown employees; ii) where BMJ has agreed a CC-BY licence shall apply, and/or iii) in accordance with the terms applicable for US Federal Government officers or employees acting as part of their official duties; on a worldwide, perpetual, irrevocable, royalty-free basis to BMJ Publishing Group Ltd ("BMJ") its licensees and where the relevant Journal is co-owned by BMJ to the co-owners of the Journal, to publish the Work in this journal and any other BMJ products and to exploit all rights, as set out in our [licence](#).

The Submitting Author accepts and understands that any supply made under these terms is made by BMJ to the Submitting Author unless you are acting as an employee on behalf of your employer or a postgraduate student of an affiliated institution which is paying any applicable article publishing charge ("APC") for Open Access articles. Where the Submitting Author wishes to make the Work available on an Open Access basis (and intends to pay the relevant APC), the terms of reuse of such Open Access shall be governed by a Creative Commons licence – details of these licences and which [Creative Commons](#) licence will apply to this Work are set out in our licence referred to above.

Other than as permitted in any relevant BMJ Author's Self Archiving Policies, I confirm this Work has not been accepted for publication elsewhere, is not being considered for publication elsewhere and does not duplicate material already published. I confirm all authors consent to publication of this Work and authorise the granting of this licence.

1  
2  
3 **1 The Effect of Metabolic Syndrome on Incidence of Oral Potentially Malignant**  
4  
5  
6 **2 Disorder: A Prospective Cohort Study in Taiwan**  
7

8 Pallop Siewchaisakul<sup>1,2,3#</sup>, Sen-Te Wang<sup>4,5#</sup>, Szu-Min Peng<sup>6</sup>, Pongdech Sarakarn<sup>7</sup>, Li-Sheng  
9  
10 Chen<sup>2,3</sup>, Tony Hsiu-Hsi Chen<sup>6</sup>, Yen-Po Yeh<sup>6,8,\*</sup>, Amy Ming-Fang Yen<sup>2,3,\*</sup>  
11  
12  
13  
14

15 # These authors contribute equally.  
16  
17

18  
19  
20 <sup>1</sup>School of Dentistry, Taipei Medical University, Taipei, Taiwan  
21

22 <sup>2</sup>Oral Health Care Research Center, College of Oral Medicine, Taipei Medical University,  
23  
24 Taipei  
25

26  
27 <sup>3</sup>School of Oral Hygiene, College of Oral Medicine, Taipei Medical University, Taipei, Taiwan  
28

29 <sup>4</sup>Department of Family Medicine, School of Medicine, College of Medicine, Taipei Medical  
30  
31 University, Taipei, Taiwan  
32

33  
34 <sup>5</sup>Department of Family Medicine, Taipei Medical University Hospital, Taipei, Taiwan  
35

36 <sup>6</sup>Institute of Epidemiology and Preventive Medicine, College of Public Health, National Taiwan  
37  
38 University  
39

40  
41 <sup>7</sup>Epidemiology and Biostatistics Department, Faculty of Public Health, Khon Kaen University,  
42  
43 Khon Kaen, Thailand  
44

45 <sup>8</sup>Changhua County Public Health Bureau  
46  
47

48  
49  
50 Word counts of Abstract: 203, Manuscript: 3153  
51

52 Number of references: 45, Tables: 4, Figures: 1  
53  
54  
55  
56  
57



1  
2  
3 24 **Running title: Metabolic Syndrome and OPMD**  
4

5 25  
6

7  
8 26 **\* Corresponding author:**  
9

10 27 Dr. Yen-Po Yeh, Changhua County Public Health Bureau, No.162, Sec. 2, Jhongshan Rd.,  
11

12 28 Changhua City, Changhua County 500, Taiwan, Telephone: +886 -4-711-5141, E-mail:  
13

14 29 yeh.leego@gmail.com, and  
15

16  
17 30 Professor Amy Ming-Fang Yen, School of Oral Hygiene, College of Oral Medicine, Taipei  
18

19 31 Medical University, 250 Wu-Hsing St. Taipei, Taiwan. Telephone: +886-2-27361661 ext 5152,  
20

21 32 Fax: +886-27362295, E-mail: amyyen@tmu.edu.tw  
22  
23  
24 33  
25  
26  
27  
28  
29  
30  
31  
32  
33  
34  
35  
36  
37  
38  
39  
40  
41  
42  
43  
44  
45  
46  
47  
48  
49  
50  
51  
52  
53  
54  
55  
56  
57  
58  
59  
60

1  
2  
3 **34 Abstract**  
4

5 **35 Objectives** We aimed to assess the effect of metabolic syndrome (MetS) on incident oral  
6  
7  
8 **36** potentially malignant disorder (OPMD).  
9

10 **37 Design** We conducted a prospective cohort study of the Changhua community-based integrated  
11  
12 **38** screening (CHCIS) programme and nationwide oral cancer screening programme during the  
13  
14  
15 **39** period between 2005 and 2014.  
16

17 **40 Setting** Changhua community-based integrated screening CHCIS, Taiwan.  
18

19 **41 Participants** We enrolled 17,590 participants aged 30 years and older.  
20

21 **42 Main outcomes and measures** We assessed the impact of MetS on the outcome measured by  
22  
23  
24 **43** incident OPMD.  
25

26 **44 Results:** The incidences of OPMD among subjects with and without MetS were 7.68 ‰ and 5.38  
27  
28  
29 ‰, respectively. After adjusting for confounders, subjects with MetS exhibited a statistically  
30  
31  
32 greater risk of developing OPMD compared with those who were free of MetS by 33%  
33  
34 (aRR=1.33, 95% CI: 1.14-1.55). Individual components of MetS still remained significant,  
35  
36 **48** including central obesity (aRR=1.22, 95% CI: 1.04-1.44), hypertriglyceridaemia (aRR=1.26,  
37  
38 **49** 95% CI: 1.07-1.49), and hyperglycaemia (aRR=1.20, 95% CI: 1.02-1.41). Central obesity and  
39  
40  
41 hypertriglyceridaemia were also statistically associated with a sub-type of OPMD, namely,  
42  
43 **51** leukoplakia.  
44

45 **52 Conclusion:** The temporal influence of MetS on the risk of incident OPMD was noted in our  
46  
47 **53** prospective cohort study. Therefore, promoting a MetS prevention and control programme might  
48  
49  
50 **54** reduce the occurrence of OPMD and oral cancer.  
51  
52  
53  
54  
55  
56  
57  
58  
59  
60

1  
2  
3 55 **Strengths and limitations of this study**  
4

- 5 56 • A large population-based prospective cohort study was conducted to examine the impact of  
6  
7  
8 57 metabolic syndrome (MetS) on incident oral potentially malignant disorder (OPMD).  
9  
10 58 • This is the first study to investigate the effect of metabolic syndrome on incidence of  
11  
12 59 OPMD as well as sub-types of OPMD, especially leukoplakia and oral submucous fibrosis.  
13  
14 60 • Investigations into other subtypes of OPMD are limited due to the rarity of other OPMD  
15  
16 61 cases in our population.  
17  
18 62 • The results of our study are based on a Taiwanese population 30 years and older, so the  
19  
20 63 generalization of our results to other regions would be limited especially given ethnic,  
21  
22 64 genetic and dietary features.  
23  
24  
25  
26  
27  
28  
29  
30  
31  
32  
33  
34  
35  
36  
37  
38  
39  
40  
41  
42  
43  
44  
45  
46  
47  
48  
49  
50  
51  
52  
53  
54  
55  
56  
57  
58  
59  
60

## 65 Introduction

66 Oral potentially malignant disorder (OPMD) is an disorder that has potential for  
67 subsequent progression to oral cancer [1]. Thus, a better understanding of the risk factors for the  
68 occurrence of OPMD is important for the primary prevention of oral cancer [2]. Evidence on  
69 tobacco use, betel quid chewing, and alcohol drinking has well documented these major risk  
70 factors for OPMD [3-4]. Metabolic syndrome (MetS) is associated with the increased risk of  
71 several cancers, including oral cancer [5,6]. MetS is also associated with OPMD [7,8]. Such an  
72 association due to common shared underlying pathways (such as chronic inflammation) could be  
73 attributed to OPMD. Several studies have proposed the possible biological linkage between  
74 OPMD and MetS, which may have pro-inflammatory markers and insulin resistance in common  
75 [9-10]. However, the true biological causes accounting for such an association between MetS  
76 and OPMD remain elusive. In spite of this, it is still very worthwhile to study how MetS is  
77 associated with OPMD by clarifying the temporal relationship between MetS and OPMD. A  
78 prospective cohort study is therefore required.

79 In the Changhua community-based integrated screening (CHCIS) programme, a routine  
80 health check-up that embraces biomarker tests for MetS has been conducted annually since 2005  
81 [11]. The early detection of OPMD and oral cancer has been provided under the instruction of  
82 nationwide oral cancer screening programme [12]. This screened cohort provides an opportunity  
83 to elucidate the effect of MetS on the incidence of OPMD with a normal cohort at baseline and  
84 followed over time until 2014.

85 Using empirical data from a large population-based integrated screening programme in  
86 combination with a nationwide oral cancer screening programme with oral visual inspection, the  
87 major aim of this study was to assess the temporal influence of MetS on OPMD.

## Materials and methods

### Study design

Our study design consists of two main steps. The first step is tailored for prevalence (cross-sectional design), and the second step is a longitudinal follow-up for incident cases of OPMD (Figure 1). We conducted cross-sectional analysis to determine the prevalence of OPMD among the MetS and MetS-free groups at baseline (identified at the first screening round) to create a normal cohort by excluding those who were diagnosed with OPMD or oral cancer before or at the first screening. Subjects in the normal cohort have undergone repeated screening continuously.

To address our initial hypothesis that MetS plays a role in the aetiology of OPMD, a prospective follow-up study was adopted. We followed the OPMD-free cohort who attended subsequent screenings in the nationwide oral cancer screening programme to identify those with an OPMD diagnosis in subsequent screening rounds. It should be noted that subjects may attend the CHCIS and nationwide oral cancer screening programme at different times. We defined the status of MetS of participants using the first screen in CHCIS and the first diagnosis of OPMD in the nationwide oral cancer screening programme.

### Study population and data collection

The CHCIS programme is a population-based screening programme that followed the service model of the Keelung community-based integrated screening (KCIS) programme [13]. These programmes provided screening services of multiple cancers (liver cancer, breast cancer, colorectal cancer, oral cancer, and cervical cancer), chronic diseases (hyperlipidaemia, hypertension, and hyperglycaemia, and MetS), and anthropometric measurements [11]. The population in this study consists of dwellers aged 30 years or older that have been participated in

1  
2  
3 111 both CHCIS and the nationwide oral cancer screening programme between 2005 and 2014.  
4  
5 112 Subjects who had a diagnosis of oral cancer before the first attendance to the CHCIS programme  
6  
7  
8 113 were excluded.  
9

10 114 All participants were instructed to follow an 8-hour fasting before blood draw. Biochemical  
11  
12 115 examination of fasting glucose and lipid profiles was performed. The anthropometric measures for  
13  
14 116 body height, body weight, and circumferences of waist and hip were measured by either public  
15  
16 117 health nurses or well-trained volunteer social workers in the community settings. All participants  
17  
18 118 in the CHCIS programme were interviewed to obtain information on education level, oral habits  
19  
20 119 (including betel nut chewing, cigarette smoking, and alcohol drinking), dietary habits, personal  
21  
22 120 disease history, and family disease history. For oral habits, we classified the habit as never, quit,  
23  
24 121 or current user. Quitting in our study refers to participants who reported habitual use of chewing  
25  
26 122 betel quid, smoking cigarettes, or drinking alcohol; however, at the time of interview, they reported  
27  
28 123 no regular consumption of betel quid, cigarettes, or alcohol. Dietary factors, including meat,  
29  
30 124 vegetable and fruit consumption, were classified as seldom (including never), infrequent, and  
31  
32 125 frequent. Infrequent meat consumption was defined as having 1-2 units per day, and frequent meat  
33  
34 126 consumption was defined as 3-4 units per day. Infrequent vegetable consumption was defined as  
35  
36 127 having a half or 1 bowl per day, and frequent vegetable consumption was defined as 3-4 bowls per  
37  
38 128 day. Infrequent fruit consumption was defined as 1-4 times per week, and frequent fruit  
39  
40 129 consumption was defined as more than 5 times per week.  
41  
42  
43  
44  
45

46 130 Instruction on informed consent was first given and approved by those who expressed the  
47  
48 131 willingness of participating in the study. This study was approved by the Institutional Review  
49  
50 132 Board of Taipei Medical University (TMU-JIRB: N201611014)  
51  
52  
53

54 133  
55  
56  
57  
58  
59  
60

### 134 **OPMD detection**

135 Since 2005, the oral visual inspection for all eligible participants was performed in  
136 Changhua County. In each on-site screening centre, trained dentists or physicians examined all  
137 participants. For those who were clinically diagnosed with oral leukoplakia, erythroleukoplakia,  
138 erythroplakia, oral submucous fibrosis (OSF), and verrucous hyperplasia were recorded as positive  
139 for OPMD.

### 141 **Metabolic syndrome**

142 Metabolic syndrome (MetS) was defined according to the Epidemiology Task Force  
143 Consensus Group criteria (2005) [14] in which participants presented at least three or more of the  
144 five components including: (1) central obesity (waist circumference  $\geq 80$  cm for females and  $\geq$   
145 90 cm for males), (2) hypertriglyceridaemia ( $\geq 150$  mg/dl), (3) low level of high-density  
146 lipoprotein cholesterol (HDL-C) ( $<50$  mg/dl for females and  $<40$  mg/dl for males), (4) elevated  
147 blood pressure (systolic blood pressure  $\geq 130$  mm Hg or diastolic blood pressure  $\geq 85$  mm Hg),  
148 and (5) hyperglycaemia (fasting glucose  $\geq 100$  mg/dl).

### 150 **Patient and Public Involvement**

151 Participants in our study were recruited through the CHCIS programme. Participants  
152 were not involved in the design and conduct of the study. Staff in the Changhua County Public  
153 Health Bureau and local health centres were responsible for preparation and implementation of  
154 the screening service in the community.

155 The results of our study will be disseminated to the public through the Changhua County  
156 Public Health Bureau.

1  
2  
3 1574  
5 1586  
7  
8 **159 Statistical analysis**

9  
10 160 Prevalence of OPMD was presented as cases per 100 persons. The OPMD incidence rate  
11  
12 161 was presented as cases per 1,000 person-years. The univariate Poisson regression model was first  
13  
14 162 used to estimate the rate ratio (RR) for MetS and factors in association with the risk for developing  
15  
16 163 OPMD. The adjusted rate ratio (aRR) was further estimated using the multi-variable Poisson  
17  
18 164 regression model when significant confounding factors from the univariate analyses and other  
19  
20 165 factors reported of having significant association with OPMD in previous studies were retained in  
21  
22 166 the model. In addition to the dichotomous variable of MetS or not, we also examined the effect of  
23  
24 167 each individual component of MetS and also the MetS score in separate models with both  
25  
26 168 univariate and multivariate analyses. The magnitude of the effect between MetS and sub-types of  
27  
28 169 OPMD was estimated in separate multi-variable Poisson regression models. Statistical  
29  
30 170 significance was defined as  $p < 0.05$ . All analyses were conducted with SAS version 9.4 (SAS  
31  
32 171 Institute Inc., Cary, NC).



## 172 **Results**

173 A total of 35,411 subjects aged 30 years or older were included in this study from 2005 to  
174 2014 in Changhua. The prevalence of OPMD was 0.87% (=306/35,411). The prevalence of MetS  
175 was 31% (=10,974/35,411) (Figure 1). Subjects with MetS had a statistically significantly 1.44-  
176 fold (95% CI: 1.14-1.82) increased risk to develop the risk for OPMD compared with those without  
177 MetS (see Supplementary Table 1).

178 The incidence of OPMD varies based on demographic and lifestyle factors (Table 1). The  
179 incidence of OPMD in subjects with MetS (7.68 per 1000 person-years) was increased compared  
180 with those who were free of MetS (5.38 per 1000 person-years). Male subjects aged between 40-  
181 59 years and those with increased body mass index (BMI), increased blood pressure, and elevated  
182 lipid profiles tended to exhibit an increased risk of OPMD compared with their complementary  
183 groups. A previous habit of betel quid chewing, smoking, and alcohol drinking were associated  
184 with an increased incidence of OPMD. High consumption of meat and lower consumption of  
185 vegetables and fruit were also related to higher risk of OPMD.

186 Table 2 shows the effect of MetS on the risk of OPMD. In univariate analysis, participants  
187 with MetS had a 42% increased risk of developing OPMD compared with those who were MetS  
188 free (RR=1.42, 95% CI: 1.22-1.66). Other factors were also associated with increased risks of  
189 developing OPMD, including male, age less than 70, betel nut chewing, cigarette smoking, alcohol  
190 drinking, meat consumption, and lower education level. In multivariable analysis, after adjusting  
191 for potential confounding factors, including age, sex, education level, betel nut chewing, cigarette  
192 smoking, meat consumption, vegetable consumption, the intake of fruit, and alcohol drinking, the  
193 association of MetS with an elevated risk of OPMD remained significant (aRR=1.33, 95% CI:  
194 1.14-1.55).

1  
2  
3 195 In addition to exclusively focusing on MetS outcome, we also investigated the effects of  
4  
5 196 individual components of MetS (Table 3). The results show that central obesity (aRR=1.22, 95%  
6  
7 197 CI: 1.04-1.44), hypertriglyceridaemia (aRR=1.26, 95% CI: 1.07-1.49) and hyperglycaemia  
8  
9 198 (aRR=1.20, 95% CI: 1.02-1.41) led to a statistically significant increased risk of OPMD. However,  
10  
11 199 the effects of MetS components were different with respect to OPMD subtypes (Table 4). For  
12  
13 200 leukoplakia, only central obesity (aRR=1.30, 95% CI: 1.07-1.57) and hypertriglyceridaemia  
14  
15 201 (aRR=1.29, 95% CI: 1.06-1.57) remained significant. Only hyperglycaemia (aRR=1.43, 95% CI:  
16  
17 202 0.99-2.05) exhibited a borderline association with an increased risk for OSF. MetS led to a 33%  
18  
19 203 elevated risk of verrucous hyperplasia, but it was not statistically significant due to the small  
20  
21 204 number (aRR=1.33, 95% CI: 0.51-3.46). Same phenomenon was noted for erythroplakia and  
22  
23 205 erythroleukoplakia (aRR=1.59, 95% CI: 0.67-3.75). We also provide detailed results on the effects  
24  
25 206 of dichotomous MetS, individual components of MetS and MetS score for all OPMD cases  
26  
27 207 (Supplementary Tables 2-3), leukoplakia (Supplementary Tables 4-6), OSF (Supplementary  
28  
29 208 Tables 7-9), verrucous hyperplasia (Supplementary Tables 10-12), and erythroplakia and  
30  
31 209 erythroleukoplakia (Supplementary Tables 13-15).  
32  
33  
34  
35  
36  
37  
38  
39  
40  
41  
42  
43  
44  
45  
46  
47  
48  
49  
50  
51  
52  
53  
54  
55  
56  
57  
58  
59  
60

## 210 **Discussion**

211 In contrast to previous studies that place emphasis on the association between MetS and  
212 OPMD, the main objective of the present study, in addition to corroborating the association  
213 studies, was to investigate a temporal sequence pertaining to the effect of MetS on incident  
214 OPMD based on a longitudinal cohort study. A statistically significant impact of MetS on  
215 incident OPMD was observed. We used a longitudinal follow-up study design to address the  
216 limitation of the cross-sectional study design given that it cannot elucidate the temporal  
217 relationship between MetS and OPMD.

218 The association between MetS and OPMD has been elucidated in several previous cross-  
219 sectional studies conducted in Keelung community-based integrated screening programme  
220 (KCIS) and in Yunlin county, and MetS increased the risk of OPMD by 68% and 39%,  
221 respectively [7,8], which has been also confirmed in our current study. We also found that MetS  
222 led to a 44% increased risk associated with MetS for the presence of OPMD.

223 Furthermore, given its prospective cohort study design, our study further demonstrated  
224 the temporal effect of MetS and individual components on incident OPMD. Such a causal  
225 relationship between MetS and the risk for OPMD is independent of two well-established risk  
226 factors for oral pre-malignant lesions, namely smoking and betel quid chewing [3], [15], [16].  
227 Applying such information to oral cancer screening would provide additional value for  
228 identifying a high-risk category of OPMD.

229 Regarding an independent contributory cause of MetS accounting for OPMD, the  
230 association between MetS and tumour progression in OPMD and oral cancer might be  
231 attributable to the common underlying mechanism, an inflammatory process or immune response  
232 for both outcomes. To our knowledge, the exact pathway linking MetS and OPMD remains

1  
2  
3 233 unclear. However, cytokines are often secreted by immune cells in response to inflammation.  
4  
5 234 This process would lead an increased amount of C-reactive protein (CRP) [17]. CRP is known as  
6  
7  
8 235 a biomarker for cardiovascular disease. Recently, CRP was found to increase oxygen radicals  
9  
10 236 [18]. These inflammatory factors can activate oncogenes and inactivate tumour suppressor genes  
11  
12 237 and can potentially induce cell proliferation and prolong cell survival, which may result in  
13  
14  
15 238 genetic instability with an increased risk of cancer [19]. Previous studies proposed common  
16  
17 239 shared mechanisms between MetS and OPMD, including pro-inflammatory markers (TNF-alpha,  
18  
19 240 CRP, IL-6) and insulin resistance [9,10,20]. Therefore, MetS may affect cancer tumour cells  
20  
21 241 through increased proliferation, angiogenesis and damage to the DNA molecule under chronic  
22  
23  
24 242 hyperglycaemia, insulin resistance and hyperinsulinemia [21-22]. In addition, MetS particularly  
25  
26 243 with insulin resistance can overstimulate insulin growth factor-1 (IGF-1) and insulin receptor.  
27  
28 244 An increasing and changing of IGF-1 signalling pathway and insulin receptor expression might  
29  
30 245 also lead to an increased risk of cancer [17]. In the present study, we found that central obesity,  
31  
32  
33 246 hyperglycaemia, and hypertriglyceridemia were significant individual components of MetS  
34  
35 247 responsible for the development of OPMD. Previous studies revealed that central obesity can  
36  
37  
38 248 stimulate insulin resistance, dyslipidaemia and systematic inflammation. The individual  
39  
40 249 components were considered to play a vital role in the pathogenesis of certain type of cancers  
41  
42 250 [23,24]. Moreover, insulin resistance was also associated with an increase in glucose and  
43  
44  
45 251 triglyceride production. Both were highly associated with the risk of developing OPMD in our  
46  
47 252 analysis.

48  
49 253 Betel quid's substances (nitrosated and arecal alkaloid derivatives) increase the risk of  
50  
51 254 oral cancer and OPMD. This effect was not restricted to their direct contact tissue. Lee et al,  
52  
53  
54 255 found that betel quid chewing and components of MetS exhibit a positive correlation explained

1  
2  
3 256 by oxidative stress and inflammation [25]. An increase in the risk of oral cancer or OPMD by  
4  
5 257 consuming betel quid and also cigarette smoking or alcohol drinking were noted in our study,  
6  
7  
8 258 even in patients who had quit these habits because they were exposed to these carcinogenesis  
9  
10 259 components for a sufficient period. Our results were consistent with previous studies, which  
11  
12 260 demonstrated that former or ex- consuming of these oral habits still had higher risk of oral  
13  
14  
15 261 cancer, leukoplakia and OSF compared with non-users[26, 27].  
16

17 262 In addition to betel quid, foods were also of concern. Numerous studies unveiled that  
18  
19 263 potential foods, such as red meat, were associated with increased IL-6 [28], and vegetable and  
20  
21 264 fruit could lowered CRP [29]. In our study, we found that only high consumption of fruit was a  
22  
23  
24 265 protective factor of OPMD. Our findings were consistent with Fann et al, and Maserejian et al.,  
25  
26 266 who found that fruit decreased the risk of periodontal disease and OPMD, respectively [30,31].  
27  
28 267 Interestingly, fruit also reduced the risk of MetS [32]. Therefore, these findings support our  
29  
30  
31 268 hypothesis that inflammation is one of the potential mechanisms underlying the relationship  
32  
33 269 between MetS and OPMD.  
34

35 270 We examined the effect of MetS on OPMD subtypes and found that MetS was associated  
36  
37 271 with an increased risk of leukoplakia but not other sub-types, including OSF, verrucous  
38  
39 272 hyperplasia, and erythleukoplakia, due to the limited number of cases. Regarding leukoplakia,  
40  
41  
42 273 among the components of MetS, only central obesity and hypertriglyceridaemia significantly  
43  
44 274 elevated the risk of leukoplakia. These results were inconsistent with the previous study that  
45  
46  
47 275 found that only hypertriglyceridaemia and hyperglycaemia significantly increased the risk of  
48  
49 276 leukoplakia [8]. Regarding hypertriglyceridaemia in leukoplakia, a previous study reported  
50  
51 277 significantly higher triglyceride levels in individuals with leukoplakia compared with healthy  
52  
53  
54 278 people [33]. Increasing triglyceride levels were possibly due to the excessive release of free fatty  
55  
56  
57  
58  
59  
60

1  
2  
3 279 acids, which resulted from insulin resistance. Moreover, insulin resistance can be stimulated by  
4  
5 280 central obesity. In addition, Meisel et al, reported that visceral obesity was more likely to be  
6  
7 281 found in people with leukoplakia compared with those without [34]. The aforementioned studies  
8  
9  
10 282 support our findings that two MetS components, including central obesity and  
11  
12 283 hypertriglyceridaemia, are associated with leukoplakia. However, the mechanism remains  
13  
14  
15 284 unclear.

16  
17 285 Although our study demonstrated that hyperglycaemia did not significantly increase the  
18  
19 286 risk of OSF, the aRR exhibited the largest increased risk magnitude in OSF. Regarding OSF, it has  
20  
21 287 been recognized that the development of fibrosis is pathologically responsible for tissue injury  
22  
23 288 caused by chronic hyperglycaemia. The development of fibrosis was driven by the accumulation  
24  
25  
26 289 of extracellular matrix (ECM) [35].

27  
28 290 One of the unique characteristics of OSF is the symptom of mouth opening restriction [36],  
29  
30 291 [37,38]. A possible causation for restricted mouth opening might involve the dynamics of ECM  
31  
32 292 deposited around muscle fibres in different stages of OSF, and these dynamics lead to the  
33  
34 293 consequence of the loss of variety of ECM molecules, including elastin, and replacement with  
35  
36 294 collagen type I muscle fibres [39]. Notably, it has been shown that hyperglycaemia can alter the  
37  
38 295 collagenolysis [40] and also ECM's components interaction through advanced glycation end  
39  
40 296 products (AGEs) modification [41-42]. These reasons mentioned above may support the  
41  
42  
43 297 borderline impact of hyperglycaemia on OSF and its symptom.

44  
45  
46 298 Another possibility of the discordance between these findings might be due to the  
47  
48 299 differences in study approaches and communities with different dietary habits. However, both  
49  
50  
51 300 studies noted that hypertriglyceridaemia and hyperglycaemia were related to OPMD. In addition  
52  
53  
54  
55  
56  
57  
58  
59  
60

1  
2  
3 301 to these biological aspects, these results are supported by the strong epidemiological study design  
4  
5 302 in which we followed up the OPMD-free study population until the occurrence of OPMD.  
6

7  
8 303 In the view of oral cancer control, primary prevention aims to reduce the exposure to risk  
9  
10 304 factors. In Taiwan, several cessation campaigns have been launched, but most of these efforts only  
11  
12 305 considered conventional risk factors, including cigarette smoking and betel nut chewing. Our study  
13  
14 306 result showed that MetS was a risk factor for OPMD. In addition, a recent study also revealed that  
15  
16 307 sweet beverage consumption elevated risk of overall cancer and breast cancer [43]. The promotion  
17  
18 308 of a MetS prevention programme after controlling for sugar-sweetened beverage or diet might  
19  
20 309 reduce OPMD and oral cancer incidence in the future.  
21  
22

23  
24 310 Several limitations existed in our study. First, several confounding factors that may link  
25  
26 311 MetS and oral cancer, such as family history of oral cancer and history of chronic diseases other  
27  
28 312 than MetS, were not considered. Second, the results of our study were derived from Taiwanese  
29  
30 313 individuals older than 30 years, so external generalization of our results to other regions would be  
31  
32 314 limited especially on the grounds of ethnic, genetic and dietary backgrounds. Third, the association  
33  
34 315 between MetS and verrucous hyperplasia, erythroplakia, and erythroleukoplakia should be  
35  
36 316 interpreted with great caution given the limited number of cases in our population. Fourth, possible  
37  
38 317 information bias exists for self-reported variables, especially oral habits. Betel nut chewing,  
39  
40 318 smoking, and alcohol drinking are behaviours that are deviant from social norms and regulations  
41  
42 319 and can be possibly under-reported. Evidence on this phenomena has been demonstrated for  
43  
44 320 reporting smoking behaviour [44, 45]. This notion might explain the 38 OSF subjects who reported  
45  
46 321 never betel quid chewing, which contradicts the well-known association between OSF and betel  
47  
48 322 quid chewing.  
49  
50  
51  
52  
53  
54  
55  
56  
57  
58  
59  
60

1  
2  
3 323 In conclusion, our prospective cohort study design affirmed the notion that MetS elevated  
4  
5 324 the risk of OPMD. This epidemiological evidence provides new insight for health policy makers  
6  
7  
8 325 to promote MetS prevention to reduce OPMD and oral cancer in the future.  
9  
10  
11  
12  
13  
14  
15  
16  
17  
18  
19  
20  
21  
22  
23  
24  
25  
26  
27  
28  
29  
30  
31  
32  
33  
34  
35  
36  
37  
38  
39  
40  
41  
42  
43  
44  
45  
46  
47  
48  
49  
50  
51  
52  
53  
54  
55  
56  
57  
58  
59  
60

For peer review only



1  
2  
3 326 **Acknowledgements:** We are grateful to Taiwan Cancer registry for information on cancer registry  
4  
5 327 data, Changhua County Public Health Bureau for screening activities, and Health and Welfare  
6  
7 328 Data Science Center, Ministry of Health and Welfare for providing administrative and technical  
8  
9  
10 329 support.

11  
12 330 **Contributors:** P Siewchaisakul, ST-W, YP-Y, and AMF-Y were responsible for  
13  
14 331 conceptualization and methodology. SM-P and YP-Y contributed to data curation and  
15  
16 332 investigation. P Siewchaisakul, CLS, and AMF-Y performed statistical analysis. P Siewchaisakul  
17  
18 333 and ST-W wrote the original draft. This study was supervised by YP-Y and AMF-Y. CTH-H and  
19  
20 334 P Sarakarn participated in editing manuscript. All authors have reviewed and approved the final  
21  
22 335 manuscript.

23  
24  
25  
26 336 **Funding:** This work was supported by Ministry of Science and Technology, Taiwan (MOST 108-  
27  
28 337 2118-M-038-001-MY3 and MOST 108-2118-M-038-002-MY3).

29  
30  
31 338 **Conflicts of interest:** None

32  
33 339 **Ethics approval:** This study was approved by the Institutional Review Board of Taipei Medical  
34  
35 340 University (TMU-JIRB: N201611014).

36  
37 341 **Provenance and peer review** Not commissioned; externally peer reviewed.

38  
39 342 **Data sharing statement:** No additional data are available.

40  
41 343 **Patient consent for publication:** Not required.  
42  
43  
44  
45  
46  
47  
48  
49  
50  
51  
52  
53  
54  
55  
56  
57  
58  
59  
60

## References

1. Warnakulasuriya S. Clinical features and presentation of oral potentially malignant disorders. *Oral Surg Oral Med Oral Pathol Oral Radiol*. 2018;125(6):582-590. doi:10.1016/j.oooo.2018.03.011
2. Sankaranarayanan R, Ramadas K, Amarasinghe H, Subramanian S, Johnson N. Oral Cancer: Prevention, Early Detection, and Treatment. In: Gelband H, Jha P, Sankaranarayanan R, Horton S, eds. *Cancer: Disease Control Priorities, Third Edition (Volume 3)*. The International Bank for Reconstruction and Development / The World Bank; 2015. Accessed October 13, 2019. <http://www.ncbi.nlm.nih.gov/books/NBK343649/>
3. Axell T, Holmstrup P, Kramer IRH, Pindborg JJ, Shear M. International seminar on oral leukoplakia and associated lesions related to tobacco habits. *Community Dent Oral Epidemiol*. 1984;12(3):145-154. doi:10.1111/j.1600-0528.1984.tb01428.x
4. Juntanong N, Siewchaisakul P, Bradshaw P, et al. Prevalence and Factors Associated with Oral Pre-malignant Lesions in Northeast Thailand. *Asian Pac J Cancer Prev*. 2016;17(8):4175-4179.
5. Esposito K, Chiodini P, Colao A, Lenzi A, Giugliano D. Metabolic Syndrome and Risk of Cancer. *Diabetes Care*. 2012;35(11):2402-2411. doi:10.2337/dc12-0336
6. Stocks T, Bjørge T, Ulmer H, et al. Metabolic risk score and cancer risk: pooled analysis of seven cohorts. *Int J Epidemiol*. 2015;44(4):1353-1363. doi:10.1093/ije/dyv001
7. Chang C-C, Lin M-S, Chen Y-T, Tu L-T, Jane S-W, Chen M-Y. Metabolic syndrome and health-related behaviours associated with pre-oral cancerous lesions among adults aged 20–80 years in Yunlin County, Taiwan: a cross-sectional study. *BMJ Open*. 2015;5(12). doi:10.1136/bmjopen-2015-008788
8. Yen AM-F, Chen SL-S, Chiu SY-H, Chen H-H. Association between metabolic syndrome and oral pre-malignancy: A community- and population-based study (KCIS No. 28). *Oral Oncol*. 2011;47(7):625-630. doi:10.1016/j.oraloncology.2011.04.011

- 1  
2  
3  
4 9. Chiang CP, Wu HY, Liu BY, Wang JT, Kuo MYP. Quantitative analysis of  
5 immunocompetent cells in oral submucous fibrosis in Taiwan. *Oral Oncol.*  
6 2002;38(1):56-63.  
7
- 8  
9 10. Ujpál M, Matos O, Bíbok G, Somogyi A, Szabó G, Suba Z. Diabetes and oral tumors in  
10 Hungary: epidemiological correlations. *Diabetes Care.* 2004;27(3):770-774.  
11 doi:10.2337/diacare.27.3.770  
12
- 13  
14 11. Yeh Y-P, Hu T-H, Cho P-Y, et al. Evaluation of Abdominal Ultrasonography Mass  
15 Screening for Hepatocellular Carcinoma in Taiwan. *Hepatol Baltim Md.*  
16 2014;59(5):1840-1849. doi:10.1002/hep.26703  
17
- 18  
19 12. Chuang S-L, Su WW-Y, Chen SL-S, et al. Population-based screening program for  
20 reducing oral cancer mortality in 2,334,299 Taiwanese cigarette smokers and/or betel  
21 quid chewers. *Cancer.* 2017;123(9):1597-1609. doi:10.1002/cncr.30517  
22
- 23  
24 13. Chen TH-H, Chiu Y-H, Luh D-L, et al. Community-based multiple screening model:  
25 design, implementation, and analysis of 42,387 participants. *Cancer.* 2004;100(8):1734-  
26 1743. doi:10.1002/cncr.20171  
27
- 28  
29 14. Alberti KGMM, Zimmet P, Shaw J, IDF Epidemiology Task Force Consensus Group.  
30 The metabolic syndrome--a new worldwide definition. *Lancet Lond Engl.*  
31 2005;366(9491):1059-1062. doi:10.1016/S0140-6736(05)67402-8  
32
- 33  
34 15. Shiu M-N, Chen T-H. Impact of betel quid, tobacco and alcohol on three-stage disease  
35 natural history of oral leukoplakia and cancer: implication for prevention of oral cancer.  
36 *Eur J Cancer Prev.* 2004;13(1):39-45.  
37
- 38  
39 16. Yen AM-F, Chen S-C, Chen TH-H. Dose-response relationships of oral habits  
40 associated with the risk of oral pre-malignant lesions among men who chew betel quid.  
41 *Oral Oncol.* 2007;43(7):634-638. doi:10.1016/j.oraloncology.2006.05.001  
42
- 43  
44 17. Ouchi N, Parker JL, Lugus JJ, Walsh K. Adipokines in inflammation and metabolic  
45 disease. *Nat Rev Immunol.* 2011;11(2):85-97. doi:10.1038/nri2921  
46
- 47  
48 18. Prasad K. C-Reactive Protein Increases Oxygen Radical Generation by Neutrophils: *J*  
49 *Cardiovasc Pharmacol Ther.* Published online June 29, 2016.  
50 doi:10.1177/107424840400900308  
51
- 52  
53 19. Feller L, Altini M, Lemmer J. Inflammation in the context of oral cancer. *Oral Oncol.*  
54 2013;49(9):887-892. doi:10.1016/j.oraloncology.2013.07.003  
55  
56  
57  
58  
59  
60

- 1  
2  
3  
4  
5  
6  
7  
8  
9  
10  
11  
12  
13  
14  
15  
16  
17  
18  
19  
20  
21  
22  
23  
24  
25  
26  
27  
28  
29  
30  
31  
32  
33  
34  
35  
36  
37  
38  
39  
40  
41  
42  
43  
44  
45  
46  
47  
48  
49  
50  
51  
52  
53  
54  
55  
56  
57  
58  
59  
60
20. Hsu H-J, Yang Y-H, Shieh T-Y, et al. Role of cytokine gene (interferon- $\gamma$ , transforming growth factor- $\beta$ 1, tumor necrosis factor- $\alpha$ , interleukin-6, and interleukin-10) polymorphisms in the risk of oral precancerous lesions in Taiwanese. *Kaohsiung J Med Sci*. 2014;30(11):551-558. doi:10.1016/j.kjms.2014.09.003
  21. Bellastella G, Scappaticcio L, Esposito K, Giugliano D, Maiorino MI. Metabolic syndrome and cancer: "The common soil hypothesis." *Diabetes Res Clin Pract*. 2018;143:389-397. doi:10.1016/j.diabres.2018.05.024
  22. Yunusova NV, Spirina LV, Frolova AE, Afanas'ev SG, Kolegova ES, Kondakova IV. Association of IGFBP-6 Expression with Metabolic Syndrome and Adiponectin and IGF-IR Receptor Levels in Colorectal Cancer. *Asian Pac J Cancer Prev APJCP*. 2016;17(8):3963-3969.
  23. Zhang Cuilin, Rexrode Kathryn M., van Dam Rob M., Li Tricia Y., Hu Frank B. Abdominal Obesity and the Risk of All-Cause, Cardiovascular, and Cancer Mortality. *Circulation*. 2008;117(13):1658-1667. doi:10.1161/CIRCULATIONAHA.107.739714
  24. Owolabi EO, Ter Goon D, Adeniyi OV. Central obesity and normal-weight central obesity among adults attending healthcare facilities in Buffalo City Metropolitan Municipality, South Africa: a cross-sectional study. *J Health Popul Nutr*. 2017;36(1):54. doi:10.1186/s41043-017-0133-x
  25. Lee B-J, Chan M-Y, Hsiao H-Y, Chang C-H, Hsu L-P, Lin P-T. Relationship of Oxidative Stress, Inflammation, and the Risk of Metabolic Syndrome in Patients with Oral Cancer. *Oxid Med Cell Longev*. 2018;2018. doi:10.1155/2018/9303094
  26. Chen P-H, Mahmood Q, Mariottini GL, Chiang T-A, Lee K-W. Adverse Health Effects of Betel Quid and the Risk of Oral and Pharyngeal Cancers. *BioMed Research International*. doi:10.1155/2017/3904098
  27. Lee C-H, Ko Y-C, Huang H-L, et al. The precancer risk of betel quid chewing, tobacco use and alcohol consumption in oral leukoplakia and oral submucous fibrosis in southern Taiwan. *Br J Cancer*. 2003;88(3):366-372. doi:10.1038/sj.bjc.6600727
  28. Ozawa M, Shipley M, Kivimaki M, Singh-Manoux A, Brunner EJ. Dietary pattern, inflammation and cognitive decline: The Whitehall II prospective cohort study. *Clin Nutr Edinb Scotl*. 2017;36(2):506-512. doi:10.1016/j.clnu.2016.01.013
  29. Silveira BKS, Oliveira TMS, Andrade PA, Hermsdorff HHM, Rosa C de OB, Franceschini S do CC. Dietary Pattern and Macronutrients Profile on the Variation of

- 1  
2  
3  
4 Inflammatory Biomarkers: Scientific Update. *Cardiol Res Pract.* 2018;2018.  
5 doi:10.1155/2018/4762575  
6  
7  
8 30. Fann JC-Y, Lai H, Chiu SY-H, Yen AM-F, Chen SL-S, Chen H-H. A population-based  
9 study on the association between the intake of soft drinks and periodontal disease in  
10 Taiwanese adults aged 35-44 years (KCIS no. 33). *Public Health Nutr.*  
11 2016;19(8):1471-1478. doi:10.1017/S1368980015002608  
12  
13  
14 31. Maserejian NN, Giovannucci E, Rosner B, Zavras A, Joshipura K. Prospective Study of  
15 Fruits and Vegetables and Risk of Oral Premalignant Lesions in Men. *Am J Epidemiol.*  
16 2006;164(6):556-566. doi:10.1093/aje/kwj233  
17  
18  
19 32. Lee M, Lim M, Kim J. Fruit and vegetable consumption and the metabolic syndrome: a  
20 systematic review and dose-response meta-analysis. *Br J Nutr.* 2019;122(7):723-733.  
21 doi:10.1017/S000711451900165X  
22  
23  
24 33. Granero Fernandez M, Lopez-Jornet P. Association between smoking, glycaemia, blood  
25 lipoproteins and risk of oral leukoplakia. *Aust Dent J.* 2017;62(1):47-51.  
26 doi:10.1111/adj.12431  
27  
28  
29 34. Meisel P, Dau M, Sümnick W, et al. Association between glycemia, serum lipoproteins,  
30 and the risk of oral leukoplakia: the population-based Study of Health in Pomerania  
31 (SHIP). *Diabetes Care.* 2010;33(6):1230-1232. doi:10.2337/dc09-1262  
32  
33  
34 35. Ban CR, Twigg SM. Fibrosis in diabetes complications: Pathogenic mechanisms and  
35 circulating and urinary markers. *Vasc Health Risk Manag.* 2008;4(3):575-596.  
36  
37  
38 36. Angadi PV, Rekha KP. Oral submucous fibrosis: a clinicopathologic review of 205  
39 cases in Indians. *Oral Maxillofac Surg.* 2011;15(1):15-19. doi:10.1007/s10006-010-  
40 0225-x  
41  
42  
43 37. Shih Y-H, Wang T-H, Shieh T-M, Tseng Y-H. Oral Submucous Fibrosis: A Review on  
44 Etiopathogenesis, Diagnosis, and Therapy. *Int J Mol Sci.* 2019;20(12):2940.  
45 doi:10.3390/ijms20122940  
46  
47  
48 38. Fang C-Y, Hsia S-M, Hsieh P-L, et al. Slug mediates myofibroblastic differentiation to  
49 promote fibrogenesis in buccal mucosa. *J Cell Physiol.* 2019;234(5):6721-6730.  
50 doi:10.1002/jcp.27418  
51  
52  
53 39. Utsunomiya H, Tilakaratne WM, Oshiro K, et al. Extracellular matrix remodeling in  
54 oral submucous fibrosis: its stage-specific modes revealed by immunohistochemistry  
55  
56  
57  
58  
59  
60

- 1  
2  
3 and in situ hybridization. *J Oral Pathol Med Off Publ Int Assoc Oral Pathol Am Acad*  
4 *Oral Pathol.* 2005;34(8):498-507. doi:10.1111/j.1600-0714.2005.00339.x  
5  
6  
7  
8 40. Stultz CM, Edelman ER. A Structural Model that Explains the Effects of  
9 Hyperglycemia on Collagenolysis. *Biophys J.* 2003;85(4):2198-2204.  
10  
11 41. Singh VP, Bali A, Singh N, Jaggi AS. Advanced glycation end products and diabetic  
12 complications. *Korean J Physiol Pharmacol Off J Korean Physiol Soc Korean Soc*  
13 *Pharmacol.* 2014;18(1):1-14. doi:10.4196/kjpp.2014.18.1.1  
14  
15  
16 42. Pastino AK, Greco TM, Mathias RA, Cristea IM, Schwarzbauer JE. Stimulatory effects  
17 of advanced glycation endproducts (AGEs) on fibronectin matrix assembly. *Matrix Biol*  
18 *J Int Soc Matrix Biol.* 2017;59:39-53. doi:10.1016/j.matbio.2016.07.003  
19  
20  
21  
22 43. Chazelas E, Srour B, Desmetz E, et al. Sugary drink consumption and risk of cancer:  
23 results from NutriNet-Santé prospective cohort. *BMJ.* 2019;366. doi:10.1136/bmj.l2408  
24  
25  
26 44. Gnamb T, Kaspar K. Disclosure of sensitive behaviors across self-administered survey  
27 modes: a meta-analysis. *Behav Res Methods.* 2015;47(4):1237-1259.  
28 doi:10.3758/s13428-014-0533-4  
29  
30  
31 45. Gorber SC, Schofield-Hurwitz S, Hardt J, Levasseur G, Tremblay M. The accuracy of  
32 self-reported smoking: A systematic review of the relationship between self-reported  
33 and cotinine-assessed smoking status. *Nicotine Tob Res.* 2009;11(1):12-24.  
34 doi:10.1093/ntr/ntn010  
35  
36  
37  
38  
39  
40  
41  
42  
43  
44  
45  
46  
47  
48  
49  
50  
51  
52  
53  
54  
55  
56  
57  
58  
59  
60

1  
2  
3  
4 **Figure Legend**  
5  
6  
7  
8  
9

10 **Figure 1 Flow chart for prospective normal cohort study design**  
11  
12  
13  
14  
15  
16  
17  
18  
19  
20  
21  
22  
23  
24  
25  
26  
27  
28  
29  
30  
31  
32  
33  
34  
35  
36  
37  
38  
39  
40  
41  
42  
43  
44  
45  
46  
47  
48  
49  
50  
51  
52  
53  
54  
55  
56  
57  
58  
59  
60

For peer review only

**Table 1 The incidence (per 1,000) of oral potentially malignant disorders by demographic features, status of metabolic syndrome and other associated risk factors**

|                             | N      | Person years | OPMD |       | OSF |      | Leukoplakia |       | Verrucous hyperplasia |      | Erythroplakia+ Erythroleukoplakia |      |
|-----------------------------|--------|--------------|------|-------|-----|------|-------------|-------|-----------------------|------|-----------------------------------|------|
|                             |        |              | No.  | %     | No. | %    | No.         | %     | No.                   | %    | No.                               | %    |
| <b>Overall</b>              | 17,590 | 116732.06    | 716  | 6.13  | 149 | 1.28 | 521         | 4.46  | 20                    | 0.17 | 26                                | 0.22 |
| <b>Metabolic Syndrome</b>   |        |              |      |       |     |      |             |       |                       |      |                                   |      |
| Yes                         | 5,789  | 38416.38     | 295  | 7.68  | 58  | 1.51 | 219         | 5.70  | 7                     | 0.18 | 11                                | 0.29 |
| No                          | 11,801 | 78315.68     | 421  | 5.38  | 91  | 1.16 | 302         | 3.86  | 13                    | 0.17 | 15                                | 0.19 |
| <b>Age</b>                  |        |              |      |       |     |      |             |       |                       |      |                                   |      |
| 30-39                       | 1,178  | 8296.07      | 47   | 5.67  | 13  | 1.57 | 28          | 3.38  | 1                     | 0.12 | 5                                 | 0.60 |
| 40-49                       | 4,359  | 29193.98     | 210  | 7.19  | 42  | 1.44 | 154         | 5.28  | 8                     | 0.27 | 6                                 | 0.21 |
| 50-59                       | 5,538  | 35137.59     | 267  | 7.60  | 48  | 1.37 | 205         | 5.83  | 6                     | 0.17 | 8                                 | 0.23 |
| 60-69                       | 4,176  | 27778.33     | 160  | 5.76  | 37  | 1.33 | 115         | 4.14  | 4                     | 0.14 | 4                                 | 0.14 |
| 70+                         | 2,339  | 16326.09     | 32   | 1.96  | 9   | 0.55 | 19          | 1.16  | 1                     | 0.06 | 3                                 | 0.18 |
| <b>Sex</b>                  |        |              |      |       |     |      |             |       |                       |      |                                   |      |
| Male                        | 15,619 | 104569.65    | 703  | 6.72  | 146 | 1.40 | 511         | 4.89  | 20                    | 0.19 | 26                                | 0.25 |
| Female                      | 1,971  | 12162.41     | 13   | 1.07  | 3   | 0.25 | 10          | 0.82  | 0                     | 0.00 | 0                                 | 0.00 |
| <b>Education</b>            |        |              |      |       |     |      |             |       |                       |      |                                   |      |
| University                  | 2140   | 13691.15     | 53   | 3.87  | 4   | 0.29 | 47          | 3.43  | 1                     | 0.07 | 1                                 | 0.07 |
| Senior high school          | 4173   | 26814.93     | 174  | 6.49  | 39  | 1.45 | 126         | 4.70  | 3                     | 0.11 | 6                                 | 0.22 |
| Junior high school or lower | 11228  | 75877.21     | 487  | 6.42  | 106 | 1.40 | 347         | 4.57  | 16                    | 0.21 | 18                                | 0.24 |
| <b>Betel quid chewing</b>   |        |              |      |       |     |      |             |       |                       |      |                                   |      |
| Never                       | 11,925 | 79006.46     | 256  | 3.24  | 38  | 0.48 | 203         | 2.57  | 10                    | 0.13 | 5                                 | 0.06 |
| Quit*                       | 3,544  | 23719.97     | 236  | 9.95  | 62  | 2.61 | 162         | 6.83  | 6                     | 0.25 | 6                                 | 0.25 |
| Current                     | 2,110  | 13920.02     | 224  | 16.09 | 49  | 3.52 | 156         | 11.21 | 4                     | 0.29 | 15                                | 1.08 |
| <b>Smoking</b>              |        |              |      |       |     |      |             |       |                       |      |                                   |      |
| Never                       | 6,976  | 46286.91     | 101  | 2.18  | 21  | 0.45 | 75          | 1.62  | 1                     | 0.02 | 4                                 | 0.09 |
| Quit*                       | 3,656  | 24678.95     | 126  | 5.11  | 36  | 1.46 | 82          | 3.32  | 3                     | 0.12 | 5                                 | 0.20 |
| Current                     | 6,947  | 45680.37     | 489  | 10.70 | 92  | 2.01 | 364         | 7.97  | 16                    | 0.35 | 17                                | 0.37 |



|    |                                  |        |          |     |      |     |      |     |      |    |      |    |      |
|----|----------------------------------|--------|----------|-----|------|-----|------|-----|------|----|------|----|------|
| 1  |                                  |        |          |     |      |     |      |     |      |    |      |    |      |
| 2  |                                  |        |          |     |      |     |      |     |      |    |      |    |      |
| 3  |                                  |        |          |     |      |     |      |     |      |    |      |    |      |
| 4  |                                  |        |          |     |      |     |      |     |      |    |      |    |      |
| 5  | <b>Alcohol drinking</b>          |        |          |     |      |     |      |     |      |    |      |    |      |
| 6  | Never                            | 8,041  | 53484.46 | 212 | 3.96 | 48  | 0.90 | 155 | 2.90 | 4  | 0.07 | 5  | 0.09 |
| 7  |                                  |        |          |     |      |     |      |     |      |    |      |    |      |
| 8  | Quit*                            | 1,009  | 6798.76  | 58  | 8.53 | 10  | 1.47 | 44  | 6.47 | 2  | 0.29 | 2  | 0.29 |
| 9  | Current                          | 8,529  | 56365.96 | 446 | 7.91 | 91  | 1.61 | 322 | 5.71 | 14 | 0.25 | 19 | 0.34 |
| 10 | <b>BMI (kg/m<sup>2</sup>)</b>    |        |          |     |      |     |      |     |      |    |      |    |      |
| 11 | <18.5                            | 422    | 2852.29  | 9   | 3.16 | 5   | 1.75 | 3   | 1.05 | 0  | 0.00 | 1  | 0.35 |
| 12 | 18.5-24.9                        | 8,844  | 58824.11 | 313 | 5.32 | 66  | 1.12 | 221 | 3.76 | 13 | 0.22 | 13 | 0.22 |
| 13 | >25                              | 8,324  | 55055.66 | 394 | 7.16 | 78  | 1.42 | 297 | 5.39 | 7  | 0.13 | 12 | 0.22 |
| 14 | <b>Triglyceride (mg/dl)</b>      |        |          |     |      |     |      |     |      |    |      |    |      |
| 15 | <150                             | 12,178 | 81399.38 | 405 | 4.98 | 87  | 1.07 | 289 | 3.55 | 14 | 0.17 | 15 | 0.18 |
| 16 | ≥150                             | 5,412  | 35332.68 | 311 | 8.80 | 62  | 1.75 | 232 | 6.57 | 6  | 0.17 | 11 | 0.31 |
| 17 | <b>HDL-C (mg/dl) **</b>          |        |          |     |      |     |      |     |      |    |      |    |      |
| 18 | Abnormal                         | 5,684  | 37372.54 | 268 | 7.17 | 50  | 1.34 | 204 | 5.46 | 5  | 0.13 | 9  | 0.24 |
| 19 | Normal                           | 11,781 | 78407.84 | 441 | 5.62 | 98  | 1.25 | 312 | 3.98 | 14 | 0.18 | 17 | 0.22 |
| 20 |                                  |        |          |     |      |     |      |     |      |    |      |    |      |
| 21 | <b>Blood pressure (mm/Hg)***</b> |        |          |     |      |     |      |     |      |    |      |    |      |
| 22 | Normal                           | 10,869 | 71713.89 | 440 | 6.14 | 94  | 1.31 | 321 | 4.48 | 12 | 0.17 | 13 | 0.18 |
| 23 | Elevated risk                    | 2,858  | 19152.31 | 127 | 6.63 | 23  | 1.20 | 91  | 4.75 | 7  | 0.37 | 6  | 0.31 |
| 24 | Hypertension                     | 3,863  | 25865.86 | 149 | 5.76 | 32  | 1.24 | 109 | 4.21 | 1  | 0.04 | 7  | 0.27 |
| 25 |                                  |        |          |     |      |     |      |     |      |    |      |    |      |
| 26 | <b>Glucose (mg/dl)</b>           |        |          |     |      |     |      |     |      |    |      |    |      |
| 27 | <100                             | 11,974 | 78755.06 | 454 | 5.76 | 90  | 1.14 | 332 | 4.22 | 13 | 0.17 | 19 | 0.24 |
| 28 | 100-125                          | 3,907  | 26462.49 | 165 | 6.24 | 37  | 1.40 | 120 | 4.53 | 5  | 0.19 | 3  | 0.11 |
| 29 | >125                             | 1,709  | 11514.51 | 97  | 8.42 | 22  | 1.91 | 69  | 5.99 | 2  | 0.17 | 4  | 0.35 |
| 30 |                                  |        |          |     |      |     |      |     |      |    |      |    |      |
| 31 | <b>Meat</b>                      |        |          |     |      |     |      |     |      |    |      |    |      |
| 32 | Seldom                           | 4,820  | 31984.38 | 171 | 5.35 | 38  | 1.19 | 127 | 3.97 | 3  | 0.09 | 3  | 0.09 |
| 33 | Infrequent                       | 11,904 | 78845.33 | 488 | 6.19 | 94  | 1.19 | 360 | 4.57 | 13 | 0.16 | 21 | 0.27 |
| 34 | Frequent                         | 829    | 5625.25  | 56  | 9.96 | 17  | 3.02 | 33  | 5.87 | 4  | 0.71 | 2  | 0.36 |
| 35 | <b>Vegetable</b>                 |        |          |     |      |     |      |     |      |    |      |    |      |
| 36 | Seldom                           | 3,679  | 24216.53 | 172 | 7.10 | 42  | 1.73 | 124 | 5.12 | 1  | 0.04 | 5  | 0.21 |
| 37 | Infrequent                       | 13,469 | 89529.87 | 527 | 5.89 | 105 | 1.17 | 384 | 4.29 | 19 | 0.21 | 19 | 0.21 |
| 38 | Frequent                         | 308    | 2045.50  | 6   | 2.93 | 0   | 0.00 | 6   | 2.93 | 0  | 0.00 | 0  | 0.00 |
| 39 |                                  |        |          |     |      |     |      |     |      |    |      |    |      |
| 40 |                                  |        |          |     |      |     |      |     |      |    |      |    |      |
| 41 |                                  |        |          |     |      |     |      |     |      |    |      |    |      |
| 42 |                                  |        |          |     |      |     |      |     |      |    |      |    |      |
| 43 |                                  |        |          |     |      |     |      |     |      |    |      |    |      |
| 44 |                                  |        |          |     |      |     |      |     |      |    |      |    |      |
| 45 |                                  |        |          |     |      |     |      |     |      |    |      |    |      |
| 46 |                                  |        |          |     |      |     |      |     |      |    |      |    |      |

| <b>Fruit</b> |       |          |     |      |    |      |     |      |    |      |    |      |
|--------------|-------|----------|-----|------|----|------|-----|------|----|------|----|------|
| Seldom       | 1,608 | 10685.41 | 102 | 9.55 | 20 | 1.87 | 75  | 7.02 | 2  | 0.19 | 5  | 0.47 |
| Infrequent   | 7,190 | 47575.85 | 333 | 7.00 | 74 | 1.56 | 233 | 4.90 | 10 | 0.21 | 16 | 0.34 |
| Frequent     | 8,773 | 58318.08 | 280 | 4.80 | 55 | 0.94 | 212 | 3.64 | 8  | 0.14 | 5  | 0.09 |

**OSF**: oral submucosa fibrosis; **\*Quit**: Quit betel quid chewing, quit smoking or quit alcohol drinking defined as those who once participated in these oral habits but no longer participate in these habit on the day of interview.

**\*\*HDL-C**: Abnormal defined as (male with  $0 < \text{HDL} < 40$ ) or (female with  $0 < \text{HDL} < 50$ ). Normal defined as (male with  $40 \leq \text{HDL}$ ) or (female with  $50 \leq \text{HDL}$ )

**\*\*\*Hypertension**: Normal defined as systolic blood pressure (sbp) $<130$  or diastolic blood pressure (dbp) $<85$ . Elevated risk defined as  $130 \leq \text{sbp} < 140$  or  $85 \leq \text{dbp} < 90$ . Hypertension defined as  $\text{sbp} \geq 140$  or  $\text{dbp} \geq 90$ .

**Table 2 The association between MetS, other factors and oral potentially malignant disorders (MetS → OPMD)**

|                                                         | RR   | 95% CI     | aRR  | 95% CI    |
|---------------------------------------------------------|------|------------|------|-----------|
| <b>Metabolic syndrome</b>                               |      |            |      |           |
| Yes vs No                                               | 1.42 | 1.22 1.66  | 1.33 | 1.14 1.55 |
| <b>Sex</b>                                              |      |            |      |           |
| Male vs Female                                          | 7.14 | 3.94 12.94 | 3.49 | 1.89 6.44 |
| <b>Age groups (vs 70+)</b>                              |      |            |      |           |
| 30-39                                                   | 2.89 | 1.85 4.52  | 2.17 | 1.35 3.47 |
| 40-49                                                   | 3.53 | 2.43 5.12  | 2.63 | 1.79 3.85 |
| 50-59                                                   | 3.63 | 2.52 5.24  | 3.10 | 2.14 4.49 |
| 60-69                                                   | 2.85 | 1.95 4.16  | 2.53 | 1.73 3.71 |
| <b>Betel nut chewing (vs Never)</b>                     |      |            |      |           |
| Quit*                                                   | 3.03 | 2.54 3.63  | 2.00 | 1.62 2.47 |
| Current                                                 | 4.92 | 4.10 5.89  | 2.68 | 2.16 3.33 |
| <b>Cigarette smoking (vs Never)</b>                     |      |            |      |           |
| Quit*                                                   | 2.32 | 1.78 3.03  | 1.31 | 0.96 1.78 |
| Current                                                 | 4.90 | 3.94 6.09  | 2.47 | 1.90 3.20 |
| <b>Alcohol drinking (vs Never)</b>                      |      |            |      |           |
| Quit*                                                   | 2.18 | 1.62 2.92  | 1.23 | 0.90 1.68 |
| Current                                                 | 1.95 | 1.65 2.30  | 1.03 | 0.86 1.23 |
| <b>Meat (vs Seldom)</b>                                 |      |            |      |           |
| Infrequent                                              | 1.13 | 0.95 1.35  | 0.95 | 0.79 1.13 |
| Frequent                                                | 1.77 | 1.30 2.41  | 1.23 | 0.90 1.68 |
| <b>Vegetable (vs Seldom)</b>                            |      |            |      |           |
| Infrequent                                              | 0.83 | 0.70 0.99  | 0.92 | 0.77 1.10 |
| Frequent                                                | 0.36 | 0.15 0.87  | 0.46 | 0.19 1.11 |
| <b>Fruit (vs Seldom)</b>                                |      |            |      |           |
| Infrequent                                              | 0.74 | 0.59 0.93  | 0.91 | 0.72 1.15 |
| Frequent                                                | 0.51 | 0.40 0.64  | 0.79 | 0.62 1.00 |
| <b>Education level (vs Junior high school or lower)</b> |      |            |      |           |
| Senior high school                                      | 1.00 | 0.84 1.19  | 0.97 | 0.80 1.17 |
| University                                              | 0.60 | 0.45 0.81  | 0.84 | 0.62 1.14 |

**aRR**: adjusted rate ratio; **CI**: confidence interval; **\*Quit**: quit betel quid chewing, quit smoking or quit alcohol drinking defined as those who once participated in these oral habits but no longer participate in these habits on the day of interview.

**Table 3 The effect of metabolic syndrome components on oral potentially malignant disorders**

|                                        | All OPMD |        |      | p-value  |
|----------------------------------------|----------|--------|------|----------|
|                                        | aRR*     | 95% CI |      |          |
| <b>Component of metabolic syndrome</b> |          |        |      |          |
| Central obesity                        | 1.22     | 1.04   | 1.44 | 0.0162   |
| Hypertriglyceridaemia                  | 1.26     | 1.07   | 1.49 | 0.0066   |
| Low HDL-C                              | 1.12     | 0.95   | 1.32 | 0.1851   |
| Elevated blood pressure                | 0.93     | 0.79   | 1.09 | 0.3586   |
| Hyperglycaemia                         | 1.20     | 1.02   | 1.41 | 0.0297   |
| <b>Metabolic syndrome score</b>        | 1.14     | 1.08   | 1.20 | < 0.0001 |

**aRR**: adjusted rate ratio; **CI**: confidence interval.

\* Adjusted rate ratio for components of metabolic syndrome and metabolic syndrome score were treated in different models with adjustment of age, sex, education level, betel nut chewing, cigarette smoking, alcohol drinking, meat, vegetable and fruit consumption.

1  
2  
3  
4  
5  
6  
7  
8  
9  
10  
11  
12  
13  
14  
15  
16  
17  
18  
19  
20  
21  
22  
23  
24  
25  
26  
27  
28  
29  
30  
31  
32  
33  
34  
35  
36  
37  
38  
39  
40  
41  
42  
43  
44  
45  
46

**Table 4 The association between metabolic syndrome and sub-types of oral potentially malignant disorders using multi-variable Poisson regression**

|                                        | Leukoplakia |        |      | OSF   |        |      | Verrucous hyperplasia |        |      | Erythroplakia + Erythroleukoplakia |        |      |
|----------------------------------------|-------------|--------|------|-------|--------|------|-----------------------|--------|------|------------------------------------|--------|------|
|                                        | aRR*        | 95% CI |      | aRR** | 95% CI |      | aRR***                | 95% CI |      | aRR***                             | 95% CI |      |
| <b>Metabolic syndrome</b>              |             |        |      |       |        |      |                       |        |      |                                    |        |      |
| Yes vs No                              | 1.37        | 1.14   | 1.64 | 1.22  | 0.87   | 1.71 | 1.33                  | 0.51   | 3.46 | 1.59                               | 0.67   | 3.75 |
| <b>Component of metabolic syndrome</b> |             |        |      |       |        |      |                       |        |      |                                    |        |      |
| Central obesity                        | 1.30        | 1.07   | 1.57 | 1.06  | 0.74   | 1.52 | 1.17                  | 0.47   | 2.89 | 0.94                               | 0.37   | 2.36 |
| Hypertriglyceridaemia                  | 1.29        | 1.06   | 1.57 | 1.21  | 0.83   | 1.76 | 0.98                  | 0.40   | 2.40 | 1.39                               | 0.54   | 3.58 |
| Low HDL-C                              | 1.17        | 0.97   | 1.42 | 0.94  | 0.64   | 1.38 | 0.79                  | 0.31   | 1.99 | 1.18                               | 0.47   | 2.97 |
| Elevated blood pressure                | 0.90        | 0.75   | 1.09 | 0.95  | 0.66   | 1.37 | 1.34                  | 0.46   | 3.85 | 1.22                               | 0.50   | 3.00 |
| Hyperglycaemia                         | 1.16        | 0.96   | 1.41 | 1.43  | 0.99   | 2.05 | 1.28                  | 0.52   | 3.19 | 0.99                               | 0.37   | 2.64 |
| <b>Metabolic syndrome score</b>        | 1.16        | 1.09   | 1.24 | 1.10  | 0.98   | 1.24 | 1.02                  | 0.68   | 1.54 | 1.13                               | 0.83   | 1.55 |

aRR: adjusted rate ratio; CI: confidence interval; OSF: oral submucous fibrosis

1  
2  
3  
4  
5 \* Adjusted rate ratio for metabolic syndrome, components of metabolic syndrome, and metabolic syndrome score were treated in different  
6 models with adjustment of age, sex, education level, betel nut chewing, cigarette smoking, alcohol drinking, meat, vegetable and fruit  
7 consumption.  
8  
9

10 \*\* Adjusted rate ratio for metabolic syndrome, components of metabolic syndrome, and metabolic syndrome score were treated in different  
11 models with adjustment of age, sex, education level, betel nut chewing, cigarette smoking, alcohol drinking, meat, and fruit consumption.  
12  
13

14 \*\*\* Adjusted rate ratio for metabolic syndrome, components of metabolic syndrome, and metabolic syndrome score were treated in different  
15 models with adjustment of betel nut chewing and cigarette smoking.  
16  
17  
18  
19  
20  
21  
22  
23  
24  
25  
26  
27  
28  
29  
30  
31  
32  
33  
34  
35  
36  
37  
38  
39  
40  
41  
42  
43  
44  
45  
46

1  
2  
3  
4 “I Amy Ming-Fang Yen The Corresponding Author of this article contained within the original  
5 manuscript which includes any diagrams & photographs within and any related or stand alone film  
6 submitted (the Contribution”) has the right to grant on behalf  
7 of all authors and does grant on behalf of all authors, a licence to the BMJ Publishing Group Ltd and  
8 its licencees, to permit this Contribution (if accepted) to be published in the BMJ and any other BMJ  
9 Group products and to exploit all subsidiary rights, as set out in our licence set out at:  
10  
11  
12  
13 [http://www.bmj.com/about-bmj/resources-authors/forms-policies-and-checklists/copyright-open-](http://www.bmj.com/about-bmj/resources-authors/forms-policies-and-checklists/copyright-open-access-and-permission-reuse)  
14 [access-and-permission-reuse.](http://www.bmj.com/about-bmj/resources-authors/forms-policies-and-checklists/copyright-open-access-and-permission-reuse)”  
15  
16  
17  
18  
19

20 IF YOU ARE A NATIONAL INSTITUTE OF HEALTH (“NIH”) EMPLOYEE, CONTRACTOR OR  
21 TRAINEE the following cover sheet will be accepted by the BMJ Group and NIH and incorporated into  
22 the above Licence.  
23  
24  
25  
26  
27

28 Please tick **one or more** boxes as appropriate:

- 29  
30  I am the sole author of the Contribution.  
31  I am one author signing on behalf of all co-owners of the Contribution.  
32  
33  The Contribution has been made in the course of my employment and I am signing as  
34 authorised by my employer.  
35  
36  I am a US Federal Government employee acting in the course of my employment.  
37  I am not a US Federal Government employee, but some or all of my co-authors are.  
38  
39  I am an employee of the UK Crown\* acting in the course of my employment  
40  I am a US Federal Government employee acting in the course of my employment.  
41  I am not a US Federal Government employee, but some or all of my co-authors are.  
42  
43  I am an employee of the UK Crown acting in the course of my employment  
44  I am not an employee of the UK Crown acting in the course of my employment but  
45 some/all of my co-authors are.\*  
46  
47  
48

49 \*Such authors should consult the any guidance issued by their employer and if  
50 necessary return any completed form;  
51 [http://www.nationalarchives.gov.uk/documents/information-management/articles-](http://www.nationalarchives.gov.uk/documents/information-management/articles-ministers-civil-servants-annexa.pdf)  
52 [ministers-civil-servants-annexa.pdf](http://www.nationalarchives.gov.uk/documents/information-management/articles-ministers-civil-servants-annexa.pdf)  
53  
54  
55  
56  
57  
58  
59  
60



**Figure 1 The flow chart for prospective normal cohort study design**



**Supplement Table 1 The association between MetS, other factors and prevalence of oral potentially malignant disorders**

|                                                         | OR   | 95%CI | aOR   | 95%CI |      |      |
|---------------------------------------------------------|------|-------|-------|-------|------|------|
| <b>Metabolic syndrome</b>                               |      |       |       |       |      |      |
| Yen vs No                                               | 1.61 | 1.28  | 2.02  | 1.44  | 1.14 | 1.82 |
| <b>Sex</b>                                              |      |       |       |       |      |      |
| Male vs Female                                          | 7.32 | 4.65  | 11.53 | 2.50  | 1.50 | 4.16 |
| <b>Age groups (vs 70+)</b>                              |      |       |       |       |      |      |
| 30-39                                                   | 0.83 | 0.39  | 1.77  | 0.87  | 0.39 | 1.92 |
| 40-49                                                   | 1.69 | 1.02  | 2.77  | 1.33  | 0.79 | 2.25 |
| 50-59                                                   | 2.52 | 1.58  | 4.04  | 2.23  | 1.38 | 3.62 |
| 60-69                                                   | 1.83 | 1.11  | 3.01  | 1.73  | 1.04 | 2.86 |
| <b>Betel nut chewing (vs Never)</b>                     |      |       |       |       |      |      |
| Quit*                                                   | 3.33 | 2.53  | 4.37  | 1.40  | 1.04 | 1.90 |
| Current                                                 | 5.71 | 4.34  | 7.52  | 2.00  | 1.47 | 2.74 |
| <b>Cigarette smoking (vs Never)</b>                     |      |       |       |       |      |      |
| Quit*                                                   | 4.72 | 3.23  | 6.91  | 2.66  | 1.72 | 4.12 |
| Current                                                 | 8.89 | 6.48  | 12.19 | 4.74  | 3.25 | 6.92 |
| <b>Alcohol drinking (vs Never)</b>                      |      |       |       |       |      |      |
| Quit*                                                   | 2.49 | 1.95  | 3.16  | 0.98  | 0.59 | 1.63 |
| Current                                                 | 2.62 | 1.62  | 4.24  | 1.01  | 0.77 | 1.32 |
| <b>Meat (vs Seldom)</b>                                 |      |       |       |       |      |      |
| Infrequent                                              | 1.28 | 0.98  | 1.67  | 1.00  | 0.76 | 1.32 |
| Frequent                                                | 2.85 | 1.83  | 4.45  | 1.67  | 1.06 | 2.63 |
| <b>Vegetable (vs Seldom)</b>                            |      |       |       |       |      |      |
| Infrequent                                              | 0.82 | 0.63  | 1.07  | 0.88  | 0.68 | 1.16 |
| Frequent                                                | 0.48 | 0.15  | 1.52  | 0.53  | 0.17 | 1.71 |
| <b>Fruit (vs Seldom)</b>                                |      |       |       |       |      |      |
| Infrequent                                              | 0.71 | 0.49  | 1.02  | 1.00  | 0.68 | 1.46 |
| Frequent                                                | 0.54 | 0.38  | 0.78  | 1.02  | 0.69 | 1.50 |
| <b>Education level (vs Junior high school or lower)</b> |      |       |       |       |      |      |
| Senior high school                                      | 1.00 | 0.77  | 1.29  | 1.06  | 0.80 | 1.41 |
| University                                              | 0.54 | 0.36  | 0.82  | 0.84  | 0.55 | 1.30 |

**aOR:** adjusted odds ratio; **CI:** confidence interval; **\*Quit:** quit betel quid chewing, quit smoking or quit alcohol drinking defined as those who once participated in these oral habits but no longer participate in these habits on the day of interview.

**Supplement Table 2 The association between Component of MetS, other factors and oral potentially malignant disorders (MetS → OPMD)**

|                                                         | RR   | 95% CI     | aRR  | 95% CI    |
|---------------------------------------------------------|------|------------|------|-----------|
| <b>Component of metabolic syndrome</b>                  |      |            |      |           |
| Central obesity                                         | 1.36 | 1.17 1.58  | 1.22 | 1.04 1.44 |
| Hypertriglyceridaemia                                   | 1.78 | 1.53 2.07  | 1.26 | 1.07 1.49 |
| Low HDL-C                                               | 1.26 | 1.08 1.47  | 1.12 | 0.95 1.32 |
| Elevated blood pressure                                 | 1.00 | 0.86 1.17  | 0.93 | 0.79 1.09 |
| Hyperglycaemia                                          | 1.21 | 1.04 1.42  | 1.20 | 1.02 1.41 |
| <b>Sex</b>                                              |      |            |      |           |
| Male vs Female                                          | 7.14 | 3.94 12.94 | 3.57 | 1.94 6.59 |
| <b>Age groups (vs 70+)</b>                              |      |            |      |           |
| 30-39                                                   | 2.89 | 1.85 4.52  | 2.19 | 1.34 3.56 |
| 40-49                                                   | 3.53 | 2.43 5.12  | 2.65 | 1.78 3.94 |
| 50-59                                                   | 3.63 | 2.52 5.24  | 3.12 | 2.13 4.58 |
| 60-69                                                   | 2.85 | 1.95 4.16  | 2.56 | 1.73 3.79 |
| <b>Betel nut chewing (vs Never)</b>                     |      |            |      |           |
| Quit*                                                   | 3.03 | 2.54 3.63  | 1.94 | 1.57 2.40 |
| Current                                                 | 4.92 | 4.10 5.89  | 2.59 | 2.08 3.22 |
| <b>Cigarette smoking (vs Never)</b>                     |      |            |      |           |
| Quit*                                                   | 2.32 | 1.78 3.03  | 1.32 | 0.96 1.79 |
| Current                                                 | 4.90 | 3.94 6.09  | 2.42 | 1.86 3.14 |
| <b>Alcohol drinking (vs Never)</b>                      |      |            |      |           |
| Quit*                                                   | 2.18 | 1.62 2.92  | 1.24 | 0.90 1.70 |
| Current                                                 | 1.95 | 1.65 2.30  | 1.03 | 0.86 1.24 |
| <b>Meat (vs Seldom)</b>                                 |      |            |      |           |
| Infrequent                                              | 1.13 | 0.95 1.35  | 0.94 | 0.79 1.13 |
| Frequent                                                | 1.77 | 1.30 2.41  | 1.22 | 0.90 1.67 |
| <b>Vegetable (vs Seldom)</b>                            |      |            |      |           |
| Infrequent                                              | 0.83 | 0.70 0.99  | 0.93 | 0.78 1.12 |
| Frequent                                                | 0.36 | 0.15 0.87  | 0.48 | 0.20 1.14 |
| <b>Fruit (vs Seldom)</b>                                |      |            |      |           |
| Infrequent                                              | 0.74 | 0.59 0.93  | 0.91 | 0.72 1.15 |
| Frequent                                                | 0.51 | 0.40 0.64  | 0.77 | 0.60 0.98 |
| <b>Education level (vs Junior high school or lower)</b> |      |            |      |           |
| Senior high school                                      | 1.00 | 0.84 1.19  | 0.98 | 0.81 1.19 |
| University                                              | 0.60 | 0.45 0.81  | 0.84 | 0.62 1.14 |

**aRR:** adjusted rate ratio; **CI:** confidence interval; **\*Quit:** quit betel quid chewing, quit smoking or quit alcohol drinking defined as those who once participated in these oral habits but no longer participate in these habits on the day of interview.

**Supplement Table 3 The association between MetS score, other factors and oral potentially malignant disorders (MetS → OPMD)**

|                                                         | RR   | 95%CI      | aRR  | 95%CI     |
|---------------------------------------------------------|------|------------|------|-----------|
| <b>Metabolic syndrome</b>                               |      |            |      |           |
| Score                                                   | 1.18 | 1.12 1.24  | 1.14 | 1.08 1.20 |
| <b>Sex</b>                                              |      |            |      |           |
| Male vs Female                                          | 7.14 | 3.94 12.94 | 3.51 | 1.90 6.47 |
| <b>Age groups (vs 70+)</b>                              |      |            |      |           |
| 30-39                                                   | 2.89 | 1.85 4.52  | 2.18 | 1.36 3.50 |
| 40-49                                                   | 3.53 | 2.43 5.12  | 2.64 | 1.80 3.87 |
| 50-59                                                   | 3.63 | 2.52 5.24  | 3.09 | 2.13 4.48 |
| 60-69                                                   | 2.85 | 1.95 4.16  | 2.53 | 1.73 3.70 |
| <b>Betel nut chewing (vs Never)</b>                     |      |            |      |           |
| Quit*                                                   | 3.03 | 2.54 3.63  | 1.98 | 1.61 2.44 |
| Current                                                 | 4.92 | 4.10 5.89  | 2.63 | 2.12 3.27 |
| <b>Cigarette smoking (vs Never)</b>                     |      |            |      |           |
| Quit*                                                   | 2.32 | 1.78 3.03  | 1.31 | 0.96 1.79 |
| Current                                                 | 4.90 | 3.94 6.09  | 2.48 | 1.91 3.22 |
| <b>Alcohol drinking (vs Never)</b>                      |      |            |      |           |
| Quit*                                                   | 2.18 | 1.62 2.92  | 1.23 | 0.90 1.68 |
| Current                                                 | 1.95 | 1.65 2.30  | 1.03 | 0.86 1.23 |
| <b>Meat (vs Seldom)</b>                                 |      |            |      |           |
| Infrequent                                              | 1.13 | 0.95 1.35  | 0.95 | 0.79 1.14 |
| Frequent                                                | 1.77 | 1.30 2.41  | 1.23 | 0.90 1.68 |
| <b>Vegetable (vs Seldom)</b>                            |      |            |      |           |
| Infrequent                                              | 0.83 | 0.70 0.99  | 0.92 | 0.77 1.10 |
| Frequent                                                | 0.36 | 0.15 0.87  | 0.46 | 0.19 1.11 |
| <b>Fruit (vs Seldom)</b>                                |      |            |      |           |
| Infrequent                                              | 0.74 | 0.59 0.93  | 0.92 | 0.73 1.15 |
| Frequent                                                | 0.51 | 0.40 0.64  | 0.79 | 0.62 1.01 |
| <b>Education level (vs Junior high school or lower)</b> |      |            |      |           |
| Senior high school                                      | 1.00 | 0.84 1.19  | 0.97 | 0.81 1.17 |
| University                                              | 0.60 | 0.45 0.81  | 0.84 | 0.62 1.14 |

**aRR:** adjusted rate ratio; **CI:** confidence interval; **\*Quit:** quit betel quid chewing, quit smoking or quit alcohol drinking defined as those who once participated in these oral habits but no longer participate in these habits on the day of interview.

**Supplement Table 4 The association between MetS, other factors and oral submucous fibrosis (MetS → OSF)**

|                                                         | RR   | 95%CI      | aRR  | 95%CI      |
|---------------------------------------------------------|------|------------|------|------------|
| <b>Metabolic syndrome</b>                               |      |            |      |            |
| Yen vs No                                               | 1.35 | 0.96 1.90  | 1.22 | 0.87 1.71  |
| <b>Sex</b>                                              |      |            |      |            |
| Male vs Female                                          | 8.16 | 2.02 32.94 | 3.34 | 0.78 14.26 |
| <b>Age groups (vs 70+)</b>                              |      |            |      |            |
| 30-39                                                   | 2.88 | 1.23 6.73  | 2.61 | 1.04 6.54  |
| 40-49                                                   | 2.60 | 1.26 5.34  | 2.08 | 0.97 4.47  |
| 50-59                                                   | 2.22 | 1.08 4.56  | 1.99 | 0.96 4.13  |
| 60-69                                                   | 2.25 | 1.08 4.69  | 2.07 | 0.99 4.33  |
| <b>Betel nut chewing (vs Never)</b>                     |      |            |      |            |
| Quit*                                                   | 5.31 | 3.49 8.06  | 3.71 | 2.23 6.16  |
| Current                                                 | 7.82 | 5.07 12.05 | 4.77 | 2.87 7.92  |
| <b>Cigarette smoking (vs Never)</b>                     |      |            |      |            |
| Quit*                                                   | 3.58 | 2.03 6.34  | 1.60 | 0.77 3.32  |
| Current                                                 | 5.10 | 3.07 8.47  | 1.96 | 1.04 3.66  |
| <b>Alcohol drinking (vs Never)</b>                      |      |            |      |            |
| Quit*                                                   | 1.78 | 0.90 3.53  | 0.72 | 0.35 1.47  |
| Current                                                 | 1.80 | 1.25 2.59  | 0.83 | 0.56 1.23  |
| <b>Meat (vs Seldom)</b>                                 |      |            |      |            |
| Infrequent                                              | 1.03 | 0.69 1.52  | 0.84 | 0.56 1.24  |
| Frequent                                                | 2.65 | 1.47 4.77  | 1.71 | 0.94 3.11  |
| <b>Fruit (vs Seldom)</b>                                |      |            |      |            |
| Infrequent                                              | 0.92 | 0.54 1.56  | 1.11 | 0.65 1.91  |
| Frequent                                                | 0.55 | 0.32 0.95  | 0.87 | 0.50 1.51  |
| <b>Education level (vs Junior high school or lower)</b> |      |            |      |            |
| Senior high school                                      | 1.11 | 0.76 1.61  | 1.07 | 0.70 1.62  |
| University                                              | 0.23 | 0.08 0.62  | 0.33 | 0.12 0.94  |

**aRR:** adjusted rate ratio; **CI:** confidence interval \***Quit:** quit betel quid chewing, quit smoking or quit alcohol drinking defined as those who once participated in these oral habits but no longer participate in these habits on the day of interview.

**Supplement Table 5 The association between Component of MetS, other factors and oral submucous fibrosis (MetS → OSF)**

|                                                         | RR   | 95%CI      | aRR  | 95%CI      |
|---------------------------------------------------------|------|------------|------|------------|
| <b>Component of metabolic syndrome</b>                  |      |            |      |            |
| Central obesity                                         | 1.21 | 0.87 1.70  | 1.06 | 0.74 1.52  |
| Hypertriglyceridaemia                                   | 1.67 | 1.19 2.34  | 1.21 | 0.83 1.76  |
| Low HDL-C                                               | 1.06 | 0.74 1.50  | 0.94 | 0.64 1.38  |
| Elevated blood pressure                                 | 1.04 | 0.74 1.47  | 0.95 | 0.66 1.37  |
| Hyperglycaemia                                          | 1.37 | 0.97 1.92  | 1.43 | 0.99 2.05  |
| <b>Sex</b>                                              |      |            |      |            |
| Male vs Female                                          | 8.16 | 2.02 32.94 | 3.27 | 0.77 13.93 |
| <b>Age groups (vs 70+)</b>                              |      |            |      |            |
| 30-39                                                   | 2.88 | 1.23 6.73  | 2.60 | 1.02 6.63  |
| 40-49                                                   | 2.60 | 1.26 5.34  | 2.05 | 0.95 4.43  |
| 50-59                                                   | 2.22 | 1.08 4.56  | 1.89 | 0.91 3.91  |
| 60-69                                                   | 2.25 | 1.08 4.69  | 2.03 | 0.97 4.26  |
| <b>Betel nut chewing (vs Never)</b>                     |      |            |      |            |
| Quit*                                                   | 5.31 | 3.49 8.06  | 3.77 | 2.26 6.31  |
| Current                                                 | 7.82 | 5.07 12.05 | 4.88 | 2.92 8.14  |
| <b>Cigarette smoking (vs Never)</b>                     |      |            |      |            |
| Quit*                                                   | 3.58 | 2.03 6.34  | 1.59 | 0.77 3.29  |
| Current                                                 | 5.10 | 3.07 8.47  | 1.91 | 1.02 3.59  |
| <b>Alcohol drinking (vs Never)</b>                      |      |            |      |            |
| Quit*                                                   | 1.78 | 0.90 3.53  | 0.73 | 0.36 1.50  |
| Current                                                 | 1.80 | 1.25 2.59  | 0.84 | 0.56 1.25  |
| <b>Meat (vs Seldom)</b>                                 |      |            |      |            |
| Infrequent                                              | 1.03 | 0.69 1.52  | 0.82 | 0.55 1.21  |
| Frequent                                                | 2.65 | 1.47 4.77  | 1.67 | 0.91 3.09  |
| <b>Fruit (vs Seldom)</b>                                |      |            |      |            |
| Infrequent                                              | 0.92 | 0.54 1.56  | 1.12 | 0.65 1.92  |
| Frequent                                                | 0.55 | 0.32 0.95  | 0.85 | 0.49 1.48  |
| <b>Education level (vs Junior high school or lower)</b> |      |            |      |            |
| Senior high school                                      | 1.11 | 0.76 1.61  | 1.09 | 0.71 1.66  |
| University                                              | 0.23 | 0.08 0.62  | 0.34 | 0.12 0.95  |

**aRR:** adjusted rate ratio; **CI:** confidence interval; **\*Quit:** quit betel quid chewing, quit smoking or quit alcohol drinking defined as those who once participated in these oral habits but no longer participate in these habits on the day of interview.

**Supplement Table 6 The association between MetS score, other factors and oral submucous fibrosis (MetS → OSF)**

|                                                         | RR   | 95%CI      | aRR  | 95%CI      |
|---------------------------------------------------------|------|------------|------|------------|
| <b>Metabolic syndrome</b>                               |      |            |      |            |
| Score                                                   | 1.15 | 1.03 1.30  | 1.10 | 0.98 1.24  |
| <b>Sex</b>                                              |      |            |      |            |
| Male vs Female                                          | 8.16 | 2.02 32.94 | 3.37 | 0.79 14.38 |
| <b>Age groups (vs 70+)</b>                              |      |            |      |            |
| 30-39                                                   | 2.88 | 1.23 6.73  | 2.63 | 1.05 6.62  |
| 40-49                                                   | 2.60 | 1.26 5.34  | 2.10 | 0.98 4.50  |
| 50-59                                                   | 2.22 | 1.08 4.56  | 1.99 | 0.96 4.12  |
| 60-69                                                   | 2.25 | 1.08 4.69  | 2.07 | 0.99 4.33  |
| <b>Betel nut chewing (vs Never)</b>                     |      |            |      |            |
| Quit*                                                   | 5.31 | 3.49 8.06  | 3.68 | 2.21 6.11  |
| Current                                                 | 7.82 | 5.07 12.05 | 4.70 | 2.83 7.80  |
| <b>Cigarette smoking (vs Never)</b>                     |      |            |      |            |
| Quit*                                                   | 3.58 | 2.03 6.34  | 1.60 | 0.77 3.33  |
| Current                                                 | 5.10 | 3.07 8.47  | 1.96 | 1.05 3.67  |
| <b>Alcohol drinking (vs Never)</b>                      |      |            |      |            |
| Quit*                                                   | 1.78 | 0.90 3.53  | 0.72 | 0.35 1.47  |
| Current                                                 | 1.80 | 1.25 2.59  | 0.83 | 0.56 1.23  |
| <b>Meat (vs Seldom)</b>                                 |      |            |      |            |
| Infrequent                                              | 1.03 | 0.69 1.52  | 0.84 | 0.57 1.24  |
| Frequent                                                | 2.65 | 1.47 4.77  | 1.71 | 0.94 3.11  |
| <b>Fruit (vs Seldom)</b>                                |      |            |      |            |
| Infrequent                                              | 0.92 | 0.54 1.56  | 1.12 | 0.65 1.92  |
| Frequent                                                | 0.55 | 0.32 0.95  | 0.87 | 0.50 1.51  |
| <b>Education level (vs Junior high school or lower)</b> |      |            |      |            |
| Senior high school                                      | 1.11 | 0.76 1.61  | 1.07 | 0.70 1.63  |
| University                                              | 0.23 | 0.08 0.62  | 0.33 | 0.12 0.94  |

**aRR:** adjusted rate ratio; **CI:** confidence interval; **\*Quit:** quit betel quid chewing, quit smoking or quit alcohol drinking defined as those who once participated in these oral habits but no longer participate in these habits on the day of interview.

**Supplement Table 7 The association between MetS, other factors and Leukoplakia  
(MetS → Leukoplakia)**

|                                                         | RR   | 95%CI      | aRR  | 95%CI     |
|---------------------------------------------------------|------|------------|------|-----------|
| <b>Metabolic syndrome</b>                               |      |            |      |           |
| Yen vs No                                               | 1.45 | 1.22 1.73  | 1.37 | 1.14 1.64 |
| <b>Sex</b>                                              |      |            |      |           |
| Male vs Female                                          | 6.48 | 3.36 12.52 | 3.29 | 1.67 6.48 |
| <b>Age groups (vs 70+)</b>                              |      |            |      |           |
| 30-39                                                   | 2.92 | 1.63 5.22  | 2.08 | 1.13 3.81 |
| 40-49                                                   | 4.38 | 2.72 7.05  | 3.20 | 1.97 5.18 |
| 50-59                                                   | 4.86 | 3.04 7.78  | 4.09 | 2.55 6.57 |
| 60-69                                                   | 3.51 | 2.16 5.71  | 3.13 | 1.92 5.09 |
| <b>Betel nut chewing (vs Never)</b>                     |      |            |      |           |
| Quit*                                                   | 2.70 | 2.20 3.33  | 1.81 | 1.42 2.30 |
| Current                                                 | 4.45 | 3.61 5.49  | 2.42 | 1.88 3.12 |
| <b>Cigarette smoking (vs Never)</b>                     |      |            |      |           |
| Quit*                                                   | 2.04 | 1.49 2.80  | 1.22 | 0.86 1.74 |
| Current                                                 | 4.88 | 3.80 6.27  | 2.66 | 1.98 3.58 |
| <b>Alcohol drinking (vs Never)</b>                      |      |            |      |           |
| Quit*                                                   | 2.29 | 1.63 3.20  | 1.36 | 0.95 1.96 |
| Current                                                 | 1.95 | 1.61 2.36  | 1.06 | 0.86 1.31 |
| <b>Meat (vs Seldom)</b>                                 |      |            |      |           |
| Infrequent                                              | 1.12 | 0.91 1.37  | 0.93 | 0.76 1.15 |
| Frequent                                                | 1.47 | 1.00 2.16  | 1.01 | 0.68 1.51 |
| <b>Vegetable (vs Seldom)</b>                            |      |            |      |           |
| Infrequent                                              | 0.84 | 0.69 1.03  | 0.93 | 0.75 1.14 |
| Frequent                                                | 0.49 | 0.20 1.19  | 0.60 | 0.25 1.45 |
| <b>Fruit (vs Seldom)</b>                                |      |            |      |           |
| Infrequent                                              | 0.68 | 0.53 0.89  | 0.85 | 0.65 1.11 |
| Frequent                                                | 0.51 | 0.39 0.66  | 0.78 | 0.59 1.03 |
| <b>Education level (vs Junior high school or lower)</b> |      |            |      |           |
| Senior high school                                      | 0.99 | 0.80 1.22  | 0.98 | 0.78 1.22 |
| University                                              | 0.74 | 0.55 1.01  | 1.03 | 0.74 1.43 |

**aRR:** adjusted rate ratio; **CI:** confidence interval; **\*Quit:** quit betel quid chewing, quit smoking or quit alcohol drinking defined as those who once participated in these oral habits but no longer participate in these habits on the day of interview.

**Supplement Table 8 The association between Component of MetS, other factors and Leukoplakia (MetS → Leukoplakia)**

|                                                         | RR   | 95%CI      | aRR  | 95%CI     |
|---------------------------------------------------------|------|------------|------|-----------|
| <b>Component of metabolic syndrome</b>                  |      |            |      |           |
| Central obesity                                         | 1.43 | 1.20 1.70  | 1.30 | 1.07 1.57 |
| Hypertriglyceridaemia                                   | 1.85 | 1.56 2.21  | 1.29 | 1.06 1.57 |
| Low HDL-C                                               | 1.34 | 1.12 1.60  | 1.17 | 0.97 1.42 |
| Elevated blood pressure                                 | 0.99 | 0.83 1.18  | 0.90 | 0.75 1.09 |
| Hyperglycaemia                                          | 1.20 | 1.00 1.44  | 1.16 | 0.96 1.41 |
| <b>Sex</b>                                              |      |            |      |           |
| Male vs Female                                          | 6.48 | 3.36 12.52 | 3.43 | 1.74 6.75 |
| <b>Age groups (vs 70+)</b>                              |      |            |      |           |
| 30-39                                                   | 2.92 | 1.63 5.22  | 2.15 | 1.14 4.06 |
| 40-49                                                   | 4.38 | 2.72 7.05  | 3.34 | 2.00 5.57 |
| 50-59                                                   | 4.86 | 3.04 7.78  | 4.30 | 2.61 7.08 |
| 60-69                                                   | 3.51 | 2.16 5.71  | 3.29 | 1.97 5.49 |
| <b>Betel nut chewing (vs Never)</b>                     |      |            |      |           |
| Quit*                                                   | 2.70 | 2.20 3.33  | 1.73 | 1.36 2.20 |
| Current                                                 | 4.45 | 3.61 5.49  | 2.31 | 1.79 2.98 |
| <b>Cigarette smoking (vs Never)</b>                     |      |            |      |           |
| Quit*                                                   | 2.04 | 1.49 2.80  | 1.23 | 0.86 1.75 |
| Current                                                 | 4.88 | 3.80 6.27  | 2.60 | 1.93 3.50 |
| <b>Alcohol drinking (vs Never)</b>                      |      |            |      |           |
| Quit*                                                   | 2.29 | 1.63 3.20  | 1.37 | 0.95 1.98 |
| Current                                                 | 1.95 | 1.61 2.36  | 1.06 | 0.86 1.32 |
| <b>Meat (vs Seldom)</b>                                 |      |            |      |           |
| Infrequent                                              | 1.12 | 0.91 1.37  | 0.94 | 0.76 1.16 |
| Frequent                                                | 1.47 | 1.00 2.16  | 1.02 | 0.68 1.51 |
| <b>Vegetable (vs Seldom)</b>                            |      |            |      |           |
| Infrequent                                              | 0.84 | 0.69 1.03  | 0.92 | 0.75 1.14 |
| Frequent                                                | 0.49 | 0.20 1.19  | 0.60 | 0.25 1.45 |
| <b>Fruit (vs Seldom)</b>                                |      |            |      |           |
| Infrequent                                              | 0.68 | 0.53 0.89  | 0.85 | 0.65 1.11 |
| Frequent                                                | 0.51 | 0.39 0.66  | 0.78 | 0.59 1.03 |
| <b>Education level (vs Junior high school or lower)</b> |      |            |      |           |
| Senior high school                                      | 0.99 | 0.80 1.22  | 0.98 | 0.78 1.22 |
| University                                              | 0.74 | 0.55 1.01  | 1.04 | 0.75 1.44 |

**aRR:** adjusted rate ratio; **CI:** confidence interval; **\*Quit:** quit betel quid chewing, quit smoking or quit alcohol drinking defined as those who once participated in these oral habits but no longer participate in these habits on the day of interview.



**Supplement Table 9 The association between MetS score, other factors and Leukoplakia (MetS → Leukoplakia)**

|                                                         | RR   | 95%CI      | aRR  | 95%CI     |
|---------------------------------------------------------|------|------------|------|-----------|
| <b>Metabolic syndrome</b>                               |      |            |      |           |
| Score                                                   | 1.20 | 1.13 1.27  | 1.16 | 1.09 1.24 |
| <b>Sex</b>                                              |      |            |      |           |
| Male vs Female                                          | 6.48 | 3.36 12.52 | 3.31 | 1.68 6.51 |
| <b>Age groups (vs 70+)</b>                              |      |            |      |           |
| 30-39                                                   | 2.92 | 1.63 5.22  | 2.09 | 1.14 3.84 |
| 40-49                                                   | 4.38 | 2.72 7.05  | 3.22 | 1.99 5.22 |
| 50-59                                                   | 4.86 | 3.04 7.78  | 4.08 | 2.54 6.54 |
| 60-69                                                   | 3.51 | 2.16 5.71  | 3.12 | 1.92 5.08 |
| <b>Betel nut chewing (vs Never)</b>                     |      |            |      |           |
| Quit*                                                   | 2.70 | 2.20 3.33  | 1.79 | 1.40 2.27 |
| Current                                                 | 4.45 | 3.61 5.49  | 2.37 | 1.84 3.05 |
| <b>Cigarette smoking (vs Never)</b>                     |      |            |      |           |
| Quit*                                                   | 2.04 | 1.49 2.80  | 1.22 | 0.86 1.74 |
| Current                                                 | 4.88 | 3.80 6.27  | 2.68 | 1.99 3.60 |
| <b>Alcohol drinking (vs Never)</b>                      |      |            |      |           |
| Quit*                                                   | 2.29 | 1.63 3.20  | 1.37 | 0.95 1.97 |
| Current                                                 | 1.95 | 1.61 2.36  | 1.05 | 0.85 1.30 |
| <b>Meat (vs Seldom)</b>                                 |      |            |      |           |
| Infrequent                                              | 1.12 | 0.91 1.37  | 0.94 | 0.76 1.16 |
| Frequent                                                | 1.47 | 1.00 2.16  | 1.02 | 0.68 1.51 |
| <b>Vegetable (vs Seldom)</b>                            |      |            |      |           |
| Infrequent                                              | 0.84 | 0.69 1.03  | 0.92 | 0.75 1.14 |
| Frequent                                                | 0.49 | 0.20 1.19  | 0.60 | 0.25 1.45 |
| <b>Fruit (vs Seldom)</b>                                |      |            |      |           |
| Infrequent                                              | 0.68 | 0.53 0.89  | 0.85 | 0.65 1.11 |
| Frequent                                                | 0.51 | 0.39 0.66  | 0.78 | 0.59 1.03 |
| <b>Education level (vs Junior high school or lower)</b> |      |            |      |           |
| Senior high school                                      | 0.99 | 0.80 1.22  | 0.98 | 0.78 1.22 |
| University                                              | 0.74 | 0.55 1.01  | 1.04 | 0.75 1.44 |

**aRR:** adjusted rate ratio; **CI:** confidence interval; **\*Quit:** quit betel quid chewing, quit smoking or quit alcohol drinking defined as those who once participated in these oral habits but no longer participate in these habits on the day of interview.

**Supplement Table 10 The association between MetS, other factors and Verrucous hyperplasia (MetS → Verrucous hyperplasia)**

|                                     | <b>RR</b> | <b>95%CI</b> | <b>aRR</b> | <b>95%CI</b> |
|-------------------------------------|-----------|--------------|------------|--------------|
| <b>Metabolic syndrome</b>           |           |              |            |              |
| Yen vs No                           | 1.32      | 0.51 3.40    | 1.33       | 0.51 3.46    |
| <b>Betel nut chewing (vs Never)</b> |           |              |            |              |
| Quit*                               | 1.92      | 0.64 5.71    | 1.24       | 0.40 3.82    |
| Current                             | 2.71      | 0.84 8.81    | 1.13       | 0.34 3.74    |
| <b>Cigarette smoking (vs Never)</b> |           |              |            |              |
| Quit*                               | 1.91      | 0.12 30.49   | 1.72       | 0.09 31.37   |
| Current                             | 17.03     | 2.26 128.38  | 15.80      | 2.04 122.28  |

**aRR:** adjusted rate ratio; **CI:** confidence interval; **\*Quit:** quit betel quid chewing, quit smoking or quit alcohol drinking defined as those who once participated in these oral habits but no longer participate in these habits on the day of interview.

**Supplement Table 11 The association between Component of MetS, other factors and Verrucous hyperplasia (MetS → Verrucous hyperplasia)**

|                                        | RR    | 95%CI       | aRR   | 95%CI       |
|----------------------------------------|-------|-------------|-------|-------------|
| <b>Component of metabolic syndrome</b> |       |             |       |             |
| Central obesity                        | 1.05  | 0.41 2.71   | 1.17  | 0.47 2.89   |
| Hypertriglyceridaemia                  | 1.26  | 0.47 3.42   | 0.98  | 0.40 2.40   |
| Low HDL-C                              | 0.88  | 0.31 2.50   | 0.79  | 0.31 1.99   |
| Elevated blood pressure                | 1.04  | 0.40 2.69   | 1.34  | 0.46 3.85   |
| Hyperglycaemia                         | 1.13  | 0.42 3.05   | 1.28  | 0.52 3.19   |
| <b>Betel nut chewing (vs Never)</b>    |       |             |       |             |
| Quit*                                  | 1.92  | 0.64 5.71   | 1.22  | 0.39 3.80   |
| Current                                | 2.71  | 0.84 8.81   | 0.84  | 0.23 3.13   |
| <b>Cigarette smoking (vs Never)</b>    |       |             |       |             |
| Quit*                                  | 1.91  | 0.12 30.49  | 1.72  | 0.09 31.29  |
| Current                                | 17.03 | 2.26 128.38 | 16.34 | 2.00 133.78 |

**aRR:** adjusted rate ratio; **CI:** confidence interval; **\*Quit:** quit betel quid chewing, quit smoking or quit alcohol drinking defined as those who once participated in these oral habits but no longer participate in these habits on the day of interview.

**Supplement Table 12 The association between MetS score, other factors and Verrucous hyperplasia (MetS → Verrucous hyperplasia)**

|                                     | <b>RR</b> | <b>95%CI</b> | <b>aRR</b> | <b>95%CI</b> |
|-------------------------------------|-----------|--------------|------------|--------------|
| <b>Metabolic syndrome</b>           |           |              |            |              |
| Score                               | 1.01      | 0.67 1.54    | 1.02       | 0.68 1.54    |
| <b>Betel nut chewing (vs Never)</b> |           |              |            |              |
| Quit*                               | 1.92      | 0.64 5.71    | 1.24       | 0.40 3.85    |
| Current                             | 2.71      | 0.84 8.81    | 1.15       | 0.34 3.91    |
| <b>Cigarette smoking (vs Never)</b> |           |              |            |              |
| Quit*                               | 1.91      | 0.12 30.49   | 1.73       | 0.09 31.58   |
| Current                             | 17.03     | 2.26 128.38  | 15.73      | 2.01 122.98  |

**aRR:** adjusted rate ratio; **CI:** confidence interval; **\*Quit:** quit betel quid chewing, quit smoking or quit alcohol drinking defined as those who once participated in these oral habits but no longer participate in these habits on the day of interview.

**Supplement Table 13 The association between MetS, other factors and Erythroplakia + Erythroleukoplakia (MetS → Erythroplakia + Erythroleukoplakia)**

|                                     | <b>RR</b> | <b>95%CI</b> | <b>aRR</b> | <b>95%CI</b> |
|-------------------------------------|-----------|--------------|------------|--------------|
| <b>Metabolic syndrome</b>           |           |              |            |              |
| Yen vs No                           | 1.88      | 0.80 4.43    | 1.59       | 0.67 3.75    |
| <b>Betel nut chewing (vs Never)</b> |           |              |            |              |
| Quit*                               | 4.31      | 1.16 16.03   | 4.47       | 0.93 21.46   |
| Current                             | 18.24     | 5.88 56.54   | 17.81      | 4.95 64.12   |
| <b>Cigarette smoking (vs Never)</b> |           |              |            |              |
| Quit*                               | 1.91      | 0.48 7.62    | 0.84       | 0.15 4.60    |
| Current                             | 3.46      | 1.13 10.61   | 0.96       | 0.26 3.49    |

**aRR:** adjusted rate ratio; **CI:** confidence interval; **\*Quit:** quit betel quid chewing, quit smoking or quit alcohol drinking defined as those who once participated in these oral habits but no longer participate in these habits on the day of interview.

**Supplement Table 14 The association between Component of MetS, other factors and Erythroplakia + Erythroleukoplakia (MetS → Erythroplakia + Erythroleukoplakia)**

|                                        | RR    | 95%CI      | aRR   | 95%CI      |
|----------------------------------------|-------|------------|-------|------------|
| <b>Component of metabolic syndrome</b> |       |            |       |            |
| Central obesity                        | 1.24  | 0.52 2.94  | 0.94  | 0.37 2.36  |
| Hypertriglyceridaemia                  | 2.10  | 0.89 4.95  | 1.39  | 0.54 3.58  |
| Low HDL-C                              | 1.30  | 0.54 3.13  | 1.18  | 0.47 2.97  |
| Elevated blood pressure                | 1.33  | 0.54 3.29  | 1.22  | 0.50 3.00  |
| Hyperglycaemia                         | 1.03  | 0.42 2.56  | 0.99  | 0.37 2.64  |
| <b>Betel nut chewing (vs Never)</b>    |       |            |       |            |
| Quit*                                  | 4.31  | 1.16 16.03 | 4.49  | 0.94 21.55 |
| Current                                | 18.24 | 5.88 56.54 | 17.86 | 5.10 62.54 |
| <b>Cigarette smoking (vs Never)</b>    |       |            |       |            |
| Quit*                                  | 1.91  | 0.48 7.62  | 0.85  | 0.15 4.65  |
| Current                                | 3.46  | 1.13 10.61 | 0.91  | 0.24 3.50  |

**aRR:** adjusted rate ratio; **CI:** confidence interval; **\*Quit:** quit betel quid chewing, quit smoking or quit alcohol drinking defined as those who once participated in these oral habits but no longer participate in these habits on the day of interview.

**Supplement Table 15 The association between MetS score, other factors and Erythroplakia + Erythroleukoplakia (MetS → Erythroplakia + Erythroleukoplakia)**

|                                     | <b>RR</b> | <b>95%CI</b> | <b>aRR</b> | <b>95%CI</b> |
|-------------------------------------|-----------|--------------|------------|--------------|
| <b>Metabolic syndrome</b>           |           |              |            |              |
| Score                               | 1.22      | 0.89 1.68    | 1.13       | 0.83 1.55    |
| <b>Betel nut chewing (vs Never)</b> |           |              |            |              |
| Quit*                               | 4.31      | 1.16 16.03   | 4.49       | 0.94 21.54   |
| Current                             | 18.24     | 5.88 56.54   | 17.92      | 4.96 64.68   |
| <b>Cigarette smoking (vs Never)</b> |           |              |            |              |
| Quit*                               | 1.91      | 0.48 7.62    | 0.84       | 0.15 4.60    |
| Current                             | 3.46      | 1.13 10.61   | 0.95       | 0.26 3.49    |

**aRR:** adjusted rate ratio; **CI:** confidence interval; **\*Quit:** quit betel quid chewing, quit smoking or quit alcohol drinking defined as those who once participated in these oral habits but no longer participate in these habits on the day of interview.

STROBE Statement—Checklist of items that should be included in reports of *cohort studies*

|                              | Item No | Recommendation                                                                                                                                                                                    | Pages          |
|------------------------------|---------|---------------------------------------------------------------------------------------------------------------------------------------------------------------------------------------------------|----------------|
| <b>Title and abstract</b>    | 1       | (a) Indicate the study's design with a commonly used term in the title or the abstract                                                                                                            | 1              |
|                              |         | (b) Provide in the abstract an informative and balanced summary of what was done and what was found                                                                                               | 3              |
| <b>Introduction</b>          |         |                                                                                                                                                                                                   |                |
| Background/rationale         | 2       | Explain the scientific background and rationale for the investigation being reported                                                                                                              | 5              |
| Objectives                   | 3       | State specific objectives, including any prespecified hypotheses                                                                                                                                  | 5              |
| <b>Methods</b>               |         |                                                                                                                                                                                                   |                |
| Study design                 | 4       | Present key elements of study design early in the paper                                                                                                                                           | 6              |
| Setting                      | 5       | Describe the setting, locations, and relevant dates, including periods of recruitment, exposure, follow-up, and data collection                                                                   | 6,7            |
| Participants                 | 6       | (a) Give the eligibility criteria, and the sources and methods of selection of participants. Describe methods of follow-up                                                                        | 6,7            |
|                              |         | (b) For matched studies, give matching criteria and number of exposed and unexposed                                                                                                               | NA             |
| Variables                    | 7       | Clearly define all outcomes, exposures, predictors, potential confounders, and effect modifiers. Give diagnostic criteria, if applicable                                                          | 7              |
| Data sources/<br>measurement | 8*      | For each variable of interest, give sources of data and details of methods of assessment (measurement). Describe comparability of assessment methods if there is more than one group              | 6,7            |
| Bias                         | 9       | Describe any efforts to address potential sources of bias                                                                                                                                         | NA             |
| Study size                   | 10      | Explain how the study size was arrived at                                                                                                                                                         | 6              |
| Quantitative variables       | 11      | Explain how quantitative variables were handled in the analyses. If applicable, describe which groupings were chosen and why                                                                      | 7,9            |
| Statistical methods          | 12      | (a) Describe all statistical methods, including those used to control for confounding                                                                                                             | 9              |
|                              |         | (b) Describe any methods used to examine subgroups and interactions                                                                                                                               | NA             |
|                              |         | (c) Explain how missing data were addressed                                                                                                                                                       | NA             |
|                              |         | (d) If applicable, explain how loss to follow-up was addressed                                                                                                                                    | NA             |
|                              |         | (e) Describe any sensitivity analyses                                                                                                                                                             | NA             |
| <b>Results</b>               |         |                                                                                                                                                                                                   |                |
| Participants                 | 13*     | (a) Report numbers of individuals at each stage of study—eg numbers potentially eligible, examined for eligibility, confirmed eligible, included in the study, completing follow-up, and analysed | 10             |
|                              |         | (b) Give reasons for non-participation at each stage                                                                                                                                              | NA             |
|                              |         | (c) Consider use of a flow diagram                                                                                                                                                                | 10<br>(Figure) |
| Descriptive data             | 14*     | (a) Give characteristics of study participants (eg demographic, clinical, social) and information on exposures and potential confounders                                                          | 10             |
|                              |         | (b) Indicate number of participants with missing data for each variable of interest                                                                                                               | NA             |
|                              |         | (c) Summarise follow-up time (eg, average and total amount)                                                                                                                                       | NA             |
| Outcome data                 | 15*     | Report numbers of outcome events or summary measures over time                                                                                                                                    | 10             |
| Main results                 | 16      | (a) Give unadjusted estimates and, if applicable, confounder-adjusted                                                                                                                             | 10,11          |



|                          |    |                                                                                                                                                                            |    |
|--------------------------|----|----------------------------------------------------------------------------------------------------------------------------------------------------------------------------|----|
|                          |    | estimates and their precision (eg, 95% confidence interval). Make clear which confounders were adjusted for and why they were included                                     |    |
|                          |    | (b) Report category boundaries when continuous variables were categorized                                                                                                  | NA |
|                          |    | (c) If relevant, consider translating estimates of relative risk into absolute risk for a meaningful time period                                                           | NA |
| Other analyses           | 17 | Report other analyses done—eg analyses of subgroups and interactions, and sensitivity analyses                                                                             | NA |
| <b>Discussion</b>        |    |                                                                                                                                                                            |    |
| Key results              | 18 | Summarise key results with reference to study objectives                                                                                                                   | 12 |
| Limitations              | 19 | Discuss limitations of the study, taking into account sources of potential bias or imprecision. Discuss both direction and magnitude of any potential bias                 | 16 |
| Interpretation           | 20 | Give a cautious overall interpretation of results considering objectives, limitations, multiplicity of analyses, results from similar studies, and other relevant evidence | 16 |
| Generalisability         | 21 | Discuss the generalisability (external validity) of the study results                                                                                                      | 16 |
| <b>Other information</b> |    |                                                                                                                                                                            |    |
| Funding                  | 22 | Give the source of funding and the role of the funders for the present study and, if applicable, for the original study on which the present article is based              | 18 |

\*Give information separately for exposed and unexposed groups.

**Note:** An Explanation and Elaboration article discusses each checklist item and gives methodological background and published examples of transparent reporting. The STROBE checklist is best used in conjunction with this article (freely available on the Web sites of PLoS Medicine at <http://www.plosmedicine.org/>, Annals of Internal Medicine at <http://www.annals.org/>, and Epidemiology at <http://www.epidem.com/>). Information on the STROBE Initiative is available at <http://www.strobe-statement.org>.
