# Supplementary material for: Effect of metabolic syndrome on incidence of oral potentially malignant disorder: a prospective cohort study in Taiwan
Source: PubMed Central journal article supplement — BMJ Open. 2020 Oct 14;10(10):e041971. doi: 10.1136/bmjopen-2020-041971 (PMC7559119; doi:10.1136/bmjopen-2020-041971), 2020-10-14
Supplement: bmjopen-2020-041971supp001.pdf [file bmjopen-2020-041971supp001.pdf]

**Supplement Table 1 The association between MetS, other factors and prevalence of oral potentially malignant disorders**

|                                                         | OR   | 95% CI     | aOR  | 95% CI    |
|---------------------------------------------------------|------|------------|------|-----------|
| <b>Metabolic syndrome</b>                               |      |            |      |           |
| Yes vs No                                               | 1.61 | 1.28 2.02  | 1.44 | 1.14 1.82 |
| <b>Sex</b>                                              |      |            |      |           |
| Male vs Female                                          | 7.32 | 4.65 11.53 | 2.50 | 1.50 4.16 |
| <b>Age groups (vs 70+)</b>                              |      |            |      |           |
| 30-39                                                   | 0.83 | 0.39 1.77  | 0.87 | 0.39 1.92 |
| 40-49                                                   | 1.69 | 1.02 2.77  | 1.33 | 0.79 2.25 |
| 50-59                                                   | 2.52 | 1.58 4.04  | 2.23 | 1.38 3.62 |
| 60-69                                                   | 1.83 | 1.11 3.01  | 1.73 | 1.04 2.86 |
| <b>Betel nut chewing (vs Never)</b>                     |      |            |      |           |
| Quit*                                                   | 3.33 | 2.53 4.37  | 1.40 | 1.04 1.90 |
| Current                                                 | 5.71 | 4.34 7.52  | 2.00 | 1.47 2.74 |
| <b>Cigarette smoking (vs Never)</b>                     |      |            |      |           |
| Quit*                                                   | 4.72 | 3.23 6.91  | 2.66 | 1.72 4.12 |
| Current                                                 | 8.89 | 6.48 12.19 | 4.74 | 3.25 6.92 |
| <b>Alcohol drinking (vs Never)</b>                      |      |            |      |           |
| Quit*                                                   | 2.49 | 1.95 3.16  | 0.98 | 0.59 1.63 |
| Current                                                 | 2.62 | 1.62 4.24  | 1.01 | 0.77 1.32 |
| <b>Meat (vs Seldom)</b>                                 |      |            |      |           |
| Infrequent                                              | 1.28 | 0.98 1.67  | 1.00 | 0.76 1.32 |
| Frequent                                                | 2.85 | 1.83 4.45  | 1.67 | 1.06 2.63 |
| <b>Vegetable (vs Seldom)</b>                            |      |            |      |           |
| Infrequent                                              | 0.82 | 0.63 1.07  | 0.88 | 0.68 1.16 |
| Frequent                                                | 0.48 | 0.15 1.52  | 0.53 | 0.17 1.71 |
| <b>Fruit (vs Seldom)</b>                                |      |            |      |           |
| Infrequent                                              | 0.71 | 0.49 1.02  | 1.00 | 0.68 1.46 |
| Frequent                                                | 0.54 | 0.38 0.78  | 1.02 | 0.69 1.50 |
| <b>Education level (vs Junior high school or lower)</b> |      |            |      |           |
| Senior high school                                      | 1.00 | 0.77 1.29  | 1.06 | 0.80 1.41 |
| University                                              | 0.54 | 0.36 0.82  | 0.84 | 0.55 1.30 |

**aOR:** adjusted odds ratio; **CI:** confidence interval; **\*Quit:** quit betel quid chewing, quit smoking or quit alcohol drinking defined as those who once participated in these oral habits but no longer participate in these habits on the day of interview.

**Supplement Table 2 The association between Component of MetS, other factors and oral potentially malignant disorders (MetS → OPMD)**

|                                                         | RR   | 95% CI |       | aRR  | 95% CI |      |
|---------------------------------------------------------|------|--------|-------|------|--------|------|
| <b>Component of metabolic syndrome</b>                  |      |        |       |      |        |      |
| Central obesity                                         | 1.36 | 1.17   | 1.58  | 1.22 | 1.04   | 1.44 |
| Hypertriglyceridaemia                                   | 1.78 | 1.53   | 2.07  | 1.26 | 1.07   | 1.49 |
| Low HDL-C                                               | 1.26 | 1.08   | 1.47  | 1.12 | 0.95   | 1.32 |
| Elevated blood pressure                                 | 1.00 | 0.86   | 1.17  | 0.93 | 0.79   | 1.09 |
| Hyperglycaemia                                          | 1.21 | 1.04   | 1.42  | 1.20 | 1.02   | 1.41 |
| <b>Sex</b>                                              |      |        |       |      |        |      |
| Male vs Female                                          | 7.14 | 3.94   | 12.94 | 3.57 | 1.94   | 6.59 |
| <b>Age groups (vs 70+)</b>                              |      |        |       |      |        |      |
| 30-39                                                   | 2.89 | 1.85   | 4.52  | 2.19 | 1.34   | 3.56 |
| 40-49                                                   | 3.53 | 2.43   | 5.12  | 2.65 | 1.78   | 3.94 |
| 50-59                                                   | 3.63 | 2.52   | 5.24  | 3.12 | 2.13   | 4.58 |
| 60-69                                                   | 2.85 | 1.95   | 4.16  | 2.56 | 1.73   | 3.79 |
| <b>Betel nut chewing (vs Never)</b>                     |      |        |       |      |        |      |
| Quit*                                                   | 3.03 | 2.54   | 3.63  | 1.94 | 1.57   | 2.40 |
| Current                                                 | 4.92 | 4.10   | 5.89  | 2.59 | 2.08   | 3.22 |
| <b>Cigarette smoking (vs Never)</b>                     |      |        |       |      |        |      |
| Quit*                                                   | 2.32 | 1.78   | 3.03  | 1.32 | 0.96   | 1.79 |
| Current                                                 | 4.90 | 3.94   | 6.09  | 2.42 | 1.86   | 3.14 |
| <b>Alcohol drinking (vs Never)</b>                      |      |        |       |      |        |      |
| Quit*                                                   | 2.18 | 1.62   | 2.92  | 1.24 | 0.90   | 1.70 |
| Current                                                 | 1.95 | 1.65   | 2.30  | 1.03 | 0.86   | 1.24 |
| <b>Meat (vs Seldom)</b>                                 |      |        |       |      |        |      |
| Infrequent                                              | 1.13 | 0.95   | 1.35  | 0.94 | 0.79   | 1.13 |
| Frequent                                                | 1.77 | 1.30   | 2.41  | 1.22 | 0.90   | 1.67 |
| <b>Vegetable (vs Seldom)</b>                            |      |        |       |      |        |      |
| Infrequent                                              | 0.83 | 0.70   | 0.99  | 0.93 | 0.78   | 1.12 |
| Frequent                                                | 0.36 | 0.15   | 0.87  | 0.48 | 0.20   | 1.14 |
| <b>Fruit (vs Seldom)</b>                                |      |        |       |      |        |      |
| Infrequent                                              | 0.74 | 0.59   | 0.93  | 0.91 | 0.72   | 1.15 |
| Frequent                                                | 0.51 | 0.40   | 0.64  | 0.77 | 0.60   | 0.98 |
| <b>Education level (vs Junior high school or lower)</b> |      |        |       |      |        |      |
| Senior high school                                      | 1.00 | 0.84   | 1.19  | 0.98 | 0.81   | 1.19 |
| University                                              | 0.60 | 0.45   | 0.81  | 0.84 | 0.62   | 1.14 |

**aRR**: adjusted rate ratio; **CI**: confidence interval; **\*Quit**: quit betel quid chewing, quit smoking or quit alcohol drinking defined as those who once participated in these oral habits but no longer participate in these habits on the day of interview.

**Supplement Table 3 The association between MetS score, other factors and oral potentially malignant disorders (MetS → OPMD)**

|                                                         | RR   | 95% CI |       | aRR  | 95% CI |      |
|---------------------------------------------------------|------|--------|-------|------|--------|------|
| <b>Metabolic syndrome</b>                               |      |        |       |      |        |      |
| Score                                                   | 1.18 | 1.12   | 1.24  | 1.14 | 1.08   | 1.20 |
| <b>Sex</b>                                              |      |        |       |      |        |      |
| Male vs Female                                          | 7.14 | 3.94   | 12.94 | 3.51 | 1.90   | 6.47 |
| <b>Age groups (vs 70+)</b>                              |      |        |       |      |        |      |
| 30-39                                                   | 2.89 | 1.85   | 4.52  | 2.18 | 1.36   | 3.50 |
| 40-49                                                   | 3.53 | 2.43   | 5.12  | 2.64 | 1.80   | 3.87 |
| 50-59                                                   | 3.63 | 2.52   | 5.24  | 3.09 | 2.13   | 4.48 |
| 60-69                                                   | 2.85 | 1.95   | 4.16  | 2.53 | 1.73   | 3.70 |
| <b>Betel nut chewing (vs Never)</b>                     |      |        |       |      |        |      |
| Quit*                                                   | 3.03 | 2.54   | 3.63  | 1.98 | 1.61   | 2.44 |
| Current                                                 | 4.92 | 4.10   | 5.89  | 2.63 | 2.12   | 3.27 |
| <b>Cigarette smoking (vs Never)</b>                     |      |        |       |      |        |      |
| Quit*                                                   | 2.32 | 1.78   | 3.03  | 1.31 | 0.96   | 1.79 |
| Current                                                 | 4.90 | 3.94   | 6.09  | 2.48 | 1.91   | 3.22 |
| <b>Alcohol drinking (vs Never)</b>                      |      |        |       |      |        |      |
| Quit*                                                   | 2.18 | 1.62   | 2.92  | 1.23 | 0.90   | 1.68 |
| Current                                                 | 1.95 | 1.65   | 2.30  | 1.03 | 0.86   | 1.23 |
| <b>Meat (vs Seldom)</b>                                 |      |        |       |      |        |      |
| Infrequent                                              | 1.13 | 0.95   | 1.35  | 0.95 | 0.79   | 1.14 |
| Frequent                                                | 1.77 | 1.30   | 2.41  | 1.23 | 0.90   | 1.68 |
| <b>Vegetable (vs Seldom)</b>                            |      |        |       |      |        |      |
| Infrequent                                              | 0.83 | 0.70   | 0.99  | 0.92 | 0.77   | 1.10 |
| Frequent                                                | 0.36 | 0.15   | 0.87  | 0.46 | 0.19   | 1.11 |
| <b>Fruit (vs Seldom)</b>                                |      |        |       |      |        |      |
| Infrequent                                              | 0.74 | 0.59   | 0.93  | 0.92 | 0.73   | 1.15 |
| Frequent                                                | 0.51 | 0.40   | 0.64  | 0.79 | 0.62   | 1.01 |
| <b>Education level (vs Junior high school or lower)</b> |      |        |       |      |        |      |
| Senior high school                                      | 1.00 | 0.84   | 1.19  | 0.97 | 0.81   | 1.17 |
| University                                              | 0.60 | 0.45   | 0.81  | 0.84 | 0.62   | 1.14 |

**aRR**: adjusted rate ratio; **CI**: confidence interval; **\*Quit**: quit betel quid chewing, quit smoking or quit alcohol drinking defined as those who once participated in these oral habits but no longer participate in these habits on the day of interview.

**Supplement Table 4 The association between MetS, other factors and oral submucous fibrosis (MetS → OSF)**

|                                                         | RR   | 95% CI     | aRR  | 95% CI     |
|---------------------------------------------------------|------|------------|------|------------|
| <b>Metabolic syndrome</b>                               |      |            |      |            |
| Yen vs No                                               | 1.35 | 0.96 1.90  | 1.22 | 0.87 1.71  |
| <b>Sex</b>                                              |      |            |      |            |
| Male vs Female                                          | 8.16 | 2.02 32.94 | 3.34 | 0.78 14.26 |
| <b>Age groups (vs 70+)</b>                              |      |            |      |            |
| 30-39                                                   | 2.88 | 1.23 6.73  | 2.61 | 1.04 6.54  |
| 40-49                                                   | 2.60 | 1.26 5.34  | 2.08 | 0.97 4.47  |
| 50-59                                                   | 2.22 | 1.08 4.56  | 1.99 | 0.96 4.13  |
| 60-69                                                   | 2.25 | 1.08 4.69  | 2.07 | 0.99 4.33  |
| <b>Betel nut chewing (vs Never)</b>                     |      |            |      |            |
| Quit*                                                   | 5.31 | 3.49 8.06  | 3.71 | 2.23 6.16  |
| Current                                                 | 7.82 | 5.07 12.05 | 4.77 | 2.87 7.92  |
| <b>Cigarette smoking (vs Never)</b>                     |      |            |      |            |
| Quit*                                                   | 3.58 | 2.03 6.34  | 1.60 | 0.77 3.32  |
| Current                                                 | 5.10 | 3.07 8.47  | 1.96 | 1.04 3.66  |
| <b>Alcohol drinking (vs Never)</b>                      |      |            |      |            |
| Quit*                                                   | 1.78 | 0.90 3.53  | 0.72 | 0.35 1.47  |
| Current                                                 | 1.80 | 1.25 2.59  | 0.83 | 0.56 1.23  |
| <b>Meat (vs Seldom)</b>                                 |      |            |      |            |
| Infrequent                                              | 1.03 | 0.69 1.52  | 0.84 | 0.56 1.24  |
| Frequent                                                | 2.65 | 1.47 4.77  | 1.71 | 0.94 3.11  |
| <b>Fruit (vs Seldom)</b>                                |      |            |      |            |
| Infrequent                                              | 0.92 | 0.54 1.56  | 1.11 | 0.65 1.91  |
| Frequent                                                | 0.55 | 0.32 0.95  | 0.87 | 0.50 1.51  |
| <b>Education level (vs Junior high school or lower)</b> |      |            |      |            |
| Senior high school                                      | 1.11 | 0.76 1.61  | 1.07 | 0.70 1.62  |
| University                                              | 0.23 | 0.08 0.62  | 0.33 | 0.12 0.94  |

**aRR**: adjusted rate ratio; **CI**: confidence interval \***Quit**: quit betel quid chewing, quit smoking or quit alcohol drinking defined as those who once participated in these oral habits but no longer participate in these habits on the day of interview.

**Supplement Table 5 The association between Component of MetS, other factors and oral submucous fibrosis (MetS → OSF)**

|                                                         | RR   | 95% CI     | aRR  | 95% CI     |
|---------------------------------------------------------|------|------------|------|------------|
| <b>Component of metabolic syndrome</b>                  |      |            |      |            |
| Central obesity                                         | 1.21 | 0.87 1.70  | 1.06 | 0.74 1.52  |
| Hypertriglyceridaemia                                   | 1.67 | 1.19 2.34  | 1.21 | 0.83 1.76  |
| Low HDL-C                                               | 1.06 | 0.74 1.50  | 0.94 | 0.64 1.38  |
| Elevated blood pressure                                 | 1.04 | 0.74 1.47  | 0.95 | 0.66 1.37  |
| Hyperglycaemia                                          | 1.37 | 0.97 1.92  | 1.43 | 0.99 2.05  |
| <b>Sex</b>                                              |      |            |      |            |
| Male vs Female                                          | 8.16 | 2.02 32.94 | 3.27 | 0.77 13.93 |
| <b>Age groups (vs 70+)</b>                              |      |            |      |            |
| 30-39                                                   | 2.88 | 1.23 6.73  | 2.60 | 1.02 6.63  |
| 40-49                                                   | 2.60 | 1.26 5.34  | 2.05 | 0.95 4.43  |
| 50-59                                                   | 2.22 | 1.08 4.56  | 1.89 | 0.91 3.91  |
| 60-69                                                   | 2.25 | 1.08 4.69  | 2.03 | 0.97 4.26  |
| <b>Betel nut chewing (vs Never)</b>                     |      |            |      |            |
| Quit*                                                   | 5.31 | 3.49 8.06  | 3.77 | 2.26 6.31  |
| Current                                                 | 7.82 | 5.07 12.05 | 4.88 | 2.92 8.14  |
| <b>Cigarette smoking (vs Never)</b>                     |      |            |      |            |
| Quit*                                                   | 3.58 | 2.03 6.34  | 1.59 | 0.77 3.29  |
| Current                                                 | 5.10 | 3.07 8.47  | 1.91 | 1.02 3.59  |
| <b>Alcohol drinking (vs Never)</b>                      |      |            |      |            |
| Quit*                                                   | 1.78 | 0.90 3.53  | 0.73 | 0.36 1.50  |
| Current                                                 | 1.80 | 1.25 2.59  | 0.84 | 0.56 1.25  |
| <b>Meat (vs Seldom)</b>                                 |      |            |      |            |
| Infrequent                                              | 1.03 | 0.69 1.52  | 0.82 | 0.55 1.21  |
| Frequent                                                | 2.65 | 1.47 4.77  | 1.67 | 0.91 3.09  |
| <b>Fruit (vs Seldom)</b>                                |      |            |      |            |
| Infrequent                                              | 0.92 | 0.54 1.56  | 1.12 | 0.65 1.92  |
| Frequent                                                | 0.55 | 0.32 0.95  | 0.85 | 0.49 1.48  |
| <b>Education level (vs Junior high school or lower)</b> |      |            |      |            |
| Senior high school                                      | 1.11 | 0.76 1.61  | 1.09 | 0.71 1.66  |
| University                                              | 0.23 | 0.08 0.62  | 0.34 | 0.12 0.95  |

**aRR**: adjusted rate ratio; **CI**: confidence interval; **\*Quit**: quit betel quid chewing, quit smoking or quit alcohol drinking defined as those who once participated in these oral habits but no longer participate in these habits on the day of interview.

**Supplement Table 6 The association between MetS score, other factors and oral submucous fibrosis (MetS → OSF)**

|                                                         | RR   | 95% CI     | aRR  | 95% CI     |
|---------------------------------------------------------|------|------------|------|------------|
| <b>Metabolic syndrome</b>                               |      |            |      |            |
| Score                                                   | 1.15 | 1.03 1.30  | 1.10 | 0.98 1.24  |
| <b>Sex</b>                                              |      |            |      |            |
| Male vs Female                                          | 8.16 | 2.02 32.94 | 3.37 | 0.79 14.38 |
| <b>Age groups (vs 70+)</b>                              |      |            |      |            |
| 30-39                                                   | 2.88 | 1.23 6.73  | 2.63 | 1.05 6.62  |
| 40-49                                                   | 2.60 | 1.26 5.34  | 2.10 | 0.98 4.50  |
| 50-59                                                   | 2.22 | 1.08 4.56  | 1.99 | 0.96 4.12  |
| 60-69                                                   | 2.25 | 1.08 4.69  | 2.07 | 0.99 4.33  |
| <b>Betel nut chewing (vs Never)</b>                     |      |            |      |            |
| Quit*                                                   | 5.31 | 3.49 8.06  | 3.68 | 2.21 6.11  |
| Current                                                 | 7.82 | 5.07 12.05 | 4.70 | 2.83 7.80  |
| <b>Cigarette smoking (vs Never)</b>                     |      |            |      |            |
| Quit*                                                   | 3.58 | 2.03 6.34  | 1.60 | 0.77 3.33  |
| Current                                                 | 5.10 | 3.07 8.47  | 1.96 | 1.05 3.67  |
| <b>Alcohol drinking (vs Never)</b>                      |      |            |      |            |
| Quit*                                                   | 1.78 | 0.90 3.53  | 0.72 | 0.35 1.47  |
| Current                                                 | 1.80 | 1.25 2.59  | 0.83 | 0.56 1.23  |
| <b>Meat (vs Seldom)</b>                                 |      |            |      |            |
| Infrequent                                              | 1.03 | 0.69 1.52  | 0.84 | 0.57 1.24  |
| Frequent                                                | 2.65 | 1.47 4.77  | 1.71 | 0.94 3.11  |
| <b>Fruit (vs Seldom)</b>                                |      |            |      |            |
| Infrequent                                              | 0.92 | 0.54 1.56  | 1.12 | 0.65 1.92  |
| Frequent                                                | 0.55 | 0.32 0.95  | 0.87 | 0.50 1.51  |
| <b>Education level (vs Junior high school or lower)</b> |      |            |      |            |
| Senior high school                                      | 1.11 | 0.76 1.61  | 1.07 | 0.70 1.63  |
| University                                              | 0.23 | 0.08 0.62  | 0.33 | 0.12 0.94  |

**aRR**: adjusted rate ratio; **CI**: confidence interval; **\*Quit**: quit betel quid chewing, quit smoking or quit alcohol drinking defined as those who once participated in these oral habits but no longer participate in these habits on the day of interview.

**Supplement Table 7 The association between MetS, other factors and Leukoplakia (MetS → Leukoplakia)**

|                                                         | RR   | 95% CI     | aRR  | 95% CI    |
|---------------------------------------------------------|------|------------|------|-----------|
| <b>Metabolic syndrome</b>                               |      |            |      |           |
| Yen vs No                                               | 1.45 | 1.22 1.73  | 1.37 | 1.14 1.64 |
| <b>Sex</b>                                              |      |            |      |           |
| Male vs Female                                          | 6.48 | 3.36 12.52 | 3.29 | 1.67 6.48 |
| <b>Age groups (vs 70+)</b>                              |      |            |      |           |
| 30-39                                                   | 2.92 | 1.63 5.22  | 2.08 | 1.13 3.81 |
| 40-49                                                   | 4.38 | 2.72 7.05  | 3.20 | 1.97 5.18 |
| 50-59                                                   | 4.86 | 3.04 7.78  | 4.09 | 2.55 6.57 |
| 60-69                                                   | 3.51 | 2.16 5.71  | 3.13 | 1.92 5.09 |
| <b>Betel nut chewing (vs Never)</b>                     |      |            |      |           |
| Quit*                                                   | 2.70 | 2.20 3.33  | 1.81 | 1.42 2.30 |
| Current                                                 | 4.45 | 3.61 5.49  | 2.42 | 1.88 3.12 |
| <b>Cigarette smoking (vs Never)</b>                     |      |            |      |           |
| Quit*                                                   | 2.04 | 1.49 2.80  | 1.22 | 0.86 1.74 |
| Current                                                 | 4.88 | 3.80 6.27  | 2.66 | 1.98 3.58 |
| <b>Alcohol drinking (vs Never)</b>                      |      |            |      |           |
| Quit*                                                   | 2.29 | 1.63 3.20  | 1.36 | 0.95 1.96 |
| Current                                                 | 1.95 | 1.61 2.36  | 1.06 | 0.86 1.31 |
| <b>Meat (vs Seldom)</b>                                 |      |            |      |           |
| Infrequent                                              | 1.12 | 0.91 1.37  | 0.93 | 0.76 1.15 |
| Frequent                                                | 1.47 | 1.00 2.16  | 1.01 | 0.68 1.51 |
| <b>Vegetable (vs Seldom)</b>                            |      |            |      |           |
| Infrequent                                              | 0.84 | 0.69 1.03  | 0.93 | 0.75 1.14 |
| Frequent                                                | 0.49 | 0.20 1.19  | 0.60 | 0.25 1.45 |
| <b>Fruit (vs Seldom)</b>                                |      |            |      |           |
| Infrequent                                              | 0.68 | 0.53 0.89  | 0.85 | 0.65 1.11 |
| Frequent                                                | 0.51 | 0.39 0.66  | 0.78 | 0.59 1.03 |
| <b>Education level (vs Junior high school or lower)</b> |      |            |      |           |
| Senior high school                                      | 0.99 | 0.80 1.22  | 0.98 | 0.78 1.22 |
| University                                              | 0.74 | 0.55 1.01  | 1.03 | 0.74 1.43 |

**aRR**: adjusted rate ratio; **CI**: confidence interval; **\*Quit**: quit betel quid chewing, quit smoking or quit alcohol drinking defined as those who once participated in these oral habits but no longer participate in these habits on the day of interview.

**Supplement Table 8 The association between Component of MetS, other factors and Leukoplakia (MetS → Leukoplakia)**

|                                                         | RR   | 95% CI     | aRR  | 95% CI    |
|---------------------------------------------------------|------|------------|------|-----------|
| <b>Component of metabolic syndrome</b>                  |      |            |      |           |
| Central obesity                                         | 1.43 | 1.20 1.70  | 1.30 | 1.07 1.57 |
| Hypertriglyceridaemia                                   | 1.85 | 1.56 2.21  | 1.29 | 1.06 1.57 |
| Low HDL-C                                               | 1.34 | 1.12 1.60  | 1.17 | 0.97 1.42 |
| Elevated blood pressure                                 | 0.99 | 0.83 1.18  | 0.90 | 0.75 1.09 |
| Hyperglycaemia                                          | 1.20 | 1.00 1.44  | 1.16 | 0.96 1.41 |
| <b>Sex</b>                                              |      |            |      |           |
| Male vs Female                                          | 6.48 | 3.36 12.52 | 3.43 | 1.74 6.75 |
| <b>Age groups (vs 70+)</b>                              |      |            |      |           |
| 30-39                                                   | 2.92 | 1.63 5.22  | 2.15 | 1.14 4.06 |
| 40-49                                                   | 4.38 | 2.72 7.05  | 3.34 | 2.00 5.57 |
| 50-59                                                   | 4.86 | 3.04 7.78  | 4.30 | 2.61 7.08 |
| 60-69                                                   | 3.51 | 2.16 5.71  | 3.29 | 1.97 5.49 |
| <b>Betel nut chewing (vs Never)</b>                     |      |            |      |           |
| Quit*                                                   | 2.70 | 2.20 3.33  | 1.73 | 1.36 2.20 |
| Current                                                 | 4.45 | 3.61 5.49  | 2.31 | 1.79 2.98 |
| <b>Cigarette smoking (vs Never)</b>                     |      |            |      |           |
| Quit*                                                   | 2.04 | 1.49 2.80  | 1.23 | 0.86 1.75 |
| Current                                                 | 4.88 | 3.80 6.27  | 2.60 | 1.93 3.50 |
| <b>Alcohol drinking (vs Never)</b>                      |      |            |      |           |
| Quit*                                                   | 2.29 | 1.63 3.20  | 1.37 | 0.95 1.98 |
| Current                                                 | 1.95 | 1.61 2.36  | 1.06 | 0.86 1.32 |
| <b>Meat (vs Seldom)</b>                                 |      |            |      |           |
| Infrequent                                              | 1.12 | 0.91 1.37  | 0.94 | 0.76 1.16 |
| Frequent                                                | 1.47 | 1.00 2.16  | 1.02 | 0.68 1.51 |
| <b>Vegetable (vs Seldom)</b>                            |      |            |      |           |
| Infrequent                                              | 0.84 | 0.69 1.03  | 0.92 | 0.75 1.14 |
| Frequent                                                | 0.49 | 0.20 1.19  | 0.60 | 0.25 1.45 |
| <b>Fruit (vs Seldom)</b>                                |      |            |      |           |
| Infrequent                                              | 0.68 | 0.53 0.89  | 0.85 | 0.65 1.11 |
| Frequent                                                | 0.51 | 0.39 0.66  | 0.78 | 0.59 1.03 |
| <b>Education level (vs Junior high school or lower)</b> |      |            |      |           |
| Senior high school                                      | 0.99 | 0.80 1.22  | 0.98 | 0.78 1.22 |
| University                                              | 0.74 | 0.55 1.01  | 1.04 | 0.75 1.44 |

**aRR**: adjusted rate ratio; **CI**: confidence interval; **\*Quit**: quit betel quid chewing, quit smoking or quit alcohol drinking defined as those who once participated in these oral habits but no longer participate in these habits on the day of interview.



**Supplement Table 9 The association between MetS score, other factors and Leukoplakia (MetS → Leukoplakia)**

|                                                         | <b>RR</b> | <b>95%CI</b> | <b>aRR</b> | <b>95%CI</b> |
|---------------------------------------------------------|-----------|--------------|------------|--------------|
| <b>Metabolic syndrome</b>                               |           |              |            |              |
| Score                                                   | 1.20      | 1.13 1.27    | 1.16       | 1.09 1.24    |
| <b>Sex</b>                                              |           |              |            |              |
| Male vs Female                                          | 6.48      | 3.36 12.52   | 3.31       | 1.68 6.51    |
| <b>Age groups (vs 70+)</b>                              |           |              |            |              |
| 30-39                                                   | 2.92      | 1.63 5.22    | 2.09       | 1.14 3.84    |
| 40-49                                                   | 4.38      | 2.72 7.05    | 3.22       | 1.99 5.22    |
| 50-59                                                   | 4.86      | 3.04 7.78    | 4.08       | 2.54 6.54    |
| 60-69                                                   | 3.51      | 2.16 5.71    | 3.12       | 1.92 5.08    |
| <b>Betel nut chewing (vs Never)</b>                     |           |              |            |              |
| Quit*                                                   | 2.70      | 2.20 3.33    | 1.79       | 1.40 2.27    |
| Current                                                 | 4.45      | 3.61 5.49    | 2.37       | 1.84 3.05    |
| <b>Cigarette smoking (vs Never)</b>                     |           |              |            |              |
| Quit*                                                   | 2.04      | 1.49 2.80    | 1.22       | 0.86 1.74    |
| Current                                                 | 4.88      | 3.80 6.27    | 2.68       | 1.99 3.60    |
| <b>Alcohol drinking (vs Never)</b>                      |           |              |            |              |
| Quit*                                                   | 2.29      | 1.63 3.20    | 1.37       | 0.95 1.97    |
| Current                                                 | 1.95      | 1.61 2.36    | 1.05       | 0.85 1.30    |
| <b>Meat (vs Seldom)</b>                                 |           |              |            |              |
| Infrequent                                              | 1.12      | 0.91 1.37    | 0.94       | 0.76 1.16    |
| Frequent                                                | 1.47      | 1.00 2.16    | 1.02       | 0.68 1.51    |
| <b>Vegetable (vs Seldom)</b>                            |           |              |            |              |
| Infrequent                                              | 0.84      | 0.69 1.03    | 0.92       | 0.75 1.14    |
| Frequent                                                | 0.49      | 0.20 1.19    | 0.60       | 0.25 1.45    |
| <b>Fruit (vs Seldom)</b>                                |           |              |            |              |
| Infrequent                                              | 0.68      | 0.53 0.89    | 0.85       | 0.65 1.11    |
| Frequent                                                | 0.51      | 0.39 0.66    | 0.78       | 0.59 1.03    |
| <b>Education level (vs Junior high school or lower)</b> |           |              |            |              |
| Senior high school                                      | 0.99      | 0.80 1.22    | 0.98       | 0.78 1.22    |
| University                                              | 0.74      | 0.55 1.01    | 1.04       | 0.75 1.44    |

**aRR**: adjusted rate ratio; **CI**: confidence interval; **\*Quit**: quit betel quid chewing, quit smoking or quit alcohol drinking defined as those who once participated in these oral habits but no longer participate in these habits on the day of interview.

**Supplement Table 10 The association between MetS, other factors and Verrucous hyperplasia (MetS → Verrucous hyperplasia)**

|                                     | RR    | 95% CI      | aRR   | 95% CI      |
|-------------------------------------|-------|-------------|-------|-------------|
| <b>Metabolic syndrome</b>           |       |             |       |             |
| Yen vs No                           | 1.32  | 0.51 3.40   | 1.33  | 0.51 3.46   |
| <b>Betel nut chewing (vs Never)</b> |       |             |       |             |
| Quit*                               | 1.92  | 0.64 5.71   | 1.24  | 0.40 3.82   |
| Current                             | 2.71  | 0.84 8.81   | 1.13  | 0.34 3.74   |
| <b>Cigarette smoking (vs Never)</b> |       |             |       |             |
| Quit*                               | 1.91  | 0.12 30.49  | 1.72  | 0.09 31.37  |
| Current                             | 17.03 | 2.26 128.38 | 15.80 | 2.04 122.28 |

**aRR**: adjusted rate ratio; **CI**: confidence interval; **\*Quit**: quit betel quid chewing, quit smoking or quit alcohol drinking defined as those who once participated in these oral habits but no longer participate in these habits on the day of interview.

**Supplement Table 11 The association between Component of MetS, other factors and Verrucous hyperplasia (MetS → Verrucous hyperplasia)**

|                                        | <b>RR</b> | <b>95% CI</b> |        | <b>aRR</b> | <b>95% CI</b> |        |
|----------------------------------------|-----------|---------------|--------|------------|---------------|--------|
| <b>Component of metabolic syndrome</b> |           |               |        |            |               |        |
| Central obesity                        | 1.05      | 0.41          | 2.71   | 1.17       | 0.47          | 2.89   |
| Hypertriglyceridaemia                  | 1.26      | 0.47          | 3.42   | 0.98       | 0.40          | 2.40   |
| Low HDL-C                              | 0.88      | 0.31          | 2.50   | 0.79       | 0.31          | 1.99   |
| Elevated blood pressure                | 1.04      | 0.40          | 2.69   | 1.34       | 0.46          | 3.85   |
| Hyperglycaemia                         | 1.13      | 0.42          | 3.05   | 1.28       | 0.52          | 3.19   |
| <b>Betel nut chewing (vs Never)</b>    |           |               |        |            |               |        |
| Quit*                                  | 1.92      | 0.64          | 5.71   | 1.22       | 0.39          | 3.80   |
| Current                                | 2.71      | 0.84          | 8.81   | 0.84       | 0.23          | 3.13   |
| <b>Cigarette smoking (vs Never)</b>    |           |               |        |            |               |        |
| Quit*                                  | 1.91      | 0.12          | 30.49  | 1.72       | 0.09          | 31.29  |
| Current                                | 17.03     | 2.26          | 128.38 | 16.34      | 2.00          | 133.78 |

**aRR**: adjusted rate ratio; **CI**: confidence interval; **\*Quit**: quit betel quid chewing, quit smoking or quit alcohol drinking defined as those who once participated in these oral habits but no longer participate in these habits on the day of interview.

**Supplement Table 12 The association between MetS score, other factors and Verrucous hyperplasia (MetS → Verrucous hyperplasia)**

|                                     | <b>RR</b> | <b>95% CI</b> | <b>aRR</b> | <b>95% CI</b> |
|-------------------------------------|-----------|---------------|------------|---------------|
| <b>Metabolic syndrome</b>           |           |               |            |               |
| Score                               | 1.01      | 0.67 1.54     | 1.02       | 0.68 1.54     |
| <b>Betel nut chewing (vs Never)</b> |           |               |            |               |
| Quit*                               | 1.92      | 0.64 5.71     | 1.24       | 0.40 3.85     |
| Current                             | 2.71      | 0.84 8.81     | 1.15       | 0.34 3.91     |
| <b>Cigarette smoking (vs Never)</b> |           |               |            |               |
| Quit*                               | 1.91      | 0.12 30.49    | 1.73       | 0.09 31.58    |
| Current                             | 17.03     | 2.26 128.38   | 15.73      | 2.01 122.98   |

**aRR**: adjusted rate ratio; **CI**: confidence interval; **\*Quit**: quit betel quid chewing, quit smoking or quit alcohol drinking defined as those who once participated in these oral habits but no longer participate in these habits on the day of interview.

**Supplement Table 13 The association between MetS, other factors and Erythroplakia + Erythroleukoplakia (MetS → Erythroplakia + Erythroleukoplakia)**

|                                     | <b>RR</b> | <b>95% CI</b> | <b>aRR</b> | <b>95% CI</b> |
|-------------------------------------|-----------|---------------|------------|---------------|
| <b>Metabolic syndrome</b>           |           |               |            |               |
| Yen vs No                           | 1.88      | 0.80 4.43     | 1.59       | 0.67 3.75     |
| <b>Betel nut chewing (vs Never)</b> |           |               |            |               |
| Quit*                               | 4.31      | 1.16 16.03    | 4.47       | 0.93 21.46    |
| Current                             | 18.24     | 5.88 56.54    | 17.81      | 4.95 64.12    |
| <b>Cigarette smoking (vs Never)</b> |           |               |            |               |
| Quit*                               | 1.91      | 0.48 7.62     | 0.84       | 0.15 4.60     |
| Current                             | 3.46      | 1.13 10.61    | 0.96       | 0.26 3.49     |

**aRR**: adjusted rate ratio; **CI**: confidence interval; **\*Quit**: quit betel quid chewing, quit smoking or quit alcohol drinking defined as those who once participated in these oral habits but no longer participate in these habits on the day of interview.

**Supplement Table 14 The association between Component of MetS, other factors and Erythroplakia + Erythroleukoplakia (MetS → Erythroplakia + Erythroleukoplakia)**

|                                        | <b>RR</b> | <b>95% CI</b> |       | <b>aRR</b> | <b>95% CI</b> |       |
|----------------------------------------|-----------|---------------|-------|------------|---------------|-------|
| <b>Component of metabolic syndrome</b> |           |               |       |            |               |       |
| Central obesity                        | 1.24      | 0.52          | 2.94  | 0.94       | 0.37          | 2.36  |
| Hypertriglyceridaemia                  | 2.10      | 0.89          | 4.95  | 1.39       | 0.54          | 3.58  |
| Low HDL-C                              | 1.30      | 0.54          | 3.13  | 1.18       | 0.47          | 2.97  |
| Elevated blood pressure                | 1.33      | 0.54          | 3.29  | 1.22       | 0.50          | 3.00  |
| Hyperglycaemia                         | 1.03      | 0.42          | 2.56  | 0.99       | 0.37          | 2.64  |
| <b>Betel nut chewing (vs Never)</b>    |           |               |       |            |               |       |
| Quit*                                  | 4.31      | 1.16          | 16.03 | 4.49       | 0.94          | 21.55 |
| Current                                | 18.24     | 5.88          | 56.54 | 17.86      | 5.10          | 62.54 |
| <b>Cigarette smoking (vs Never)</b>    |           |               |       |            |               |       |
| Quit*                                  | 1.91      | 0.48          | 7.62  | 0.85       | 0.15          | 4.65  |
| Current                                | 3.46      | 1.13          | 10.61 | 0.91       | 0.24          | 3.50  |

**aRR**: adjusted rate ratio; **CI**: confidence interval; **\*Quit**: quit betel quid chewing, quit smoking or quit alcohol drinking defined as those who once participated in these oral habits but no longer participate in these habits on the day of interview.

**Supplement Table 15 The association between MetS score, other factors and Erythroplakia + Erythroleukoplakia (MetS → Erythroplakia + Erythroleukoplakia)**

|                                     | <b>RR</b> | <b>95% CI</b> |       | <b>aRR</b> | <b>95% CI</b> |       |
|-------------------------------------|-----------|---------------|-------|------------|---------------|-------|
| <b>Metabolic syndrome</b>           |           |               |       |            |               |       |
| Score                               | 1.22      | 0.89          | 1.68  | 1.13       | 0.83          | 1.55  |
| <b>Betel nut chewing (vs Never)</b> |           |               |       |            |               |       |
| Quit*                               | 4.31      | 1.16          | 16.03 | 4.49       | 0.94          | 21.54 |
| Current                             | 18.24     | 5.88          | 56.54 | 17.92      | 4.96          | 64.68 |
| <b>Cigarette smoking (vs Never)</b> |           |               |       |            |               |       |
| Quit*                               | 1.91      | 0.48          | 7.62  | 0.84       | 0.15          | 4.60  |
| Current                             | 3.46      | 1.13          | 10.61 | 0.95       | 0.26          | 3.49  |

**aRR**: adjusted rate ratio; **CI**: confidence interval; **\*Quit**: quit betel quid chewing, quit smoking or quit alcohol drinking defined as those who once participated in these oral habits but no longer participate in these habits on the day of interview.
